# Supplementary material
Source: PubMed Central journal article supplement (PMC8789808)
Supplement: 41392_2022_879_MOESM2_ESM.pdf [file 41392_2022_879_MOESM2_ESM.pdf]

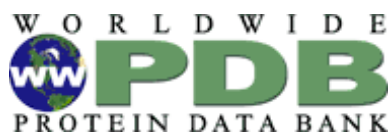

# Preliminary Full wwPDB EM Validation Report ⓘ

Dec 17, 2021 – 05:13 PM JST

Deposition ID : D\_1300026375

This is a Preliminary Full wwPDB EM Validation Report.

This report is produced by the wwPDB Deposition System during initial deposition but before annotation of the structure.

We welcome your comments at [validation@mail.wwpdb.org](mailto:validation@mail.wwpdb.org)

A user guide is available at

<https://www.wwpdb.org/validation/2017/EMValidationReportHelp>

with specific help available everywhere you see the ⓘ symbol.

---

The following versions of software and data (see [references ⓘ](#)) were used in the production of this report:

|                                |   |                                                                    |
|--------------------------------|---|--------------------------------------------------------------------|
| EMDB validation analysis       | : | 0.0.0.dev97                                                        |
| Mogul                          | : | 1.8.5 (274361), CSD as541be (2020)                                 |
| MolProbity                     | : | 4.02b-467                                                          |
| Percentile statistics          | : | 20191225.v01 (using entries in the PDB archive December 25th 2019) |
| Ideal geometry (proteins)      | : | Engh & Huber (2001)                                                |
| Ideal geometry (DNA, RNA)      | : | Parkinson et al. (1996)                                            |
| Validation Pipeline (wwPDB-VP) | : | 2.24                                                               |

# 1 Overall quality at a glance i

The following experimental techniques were used to determine the structure:  
*ELECTRON MICROSCOPY*

The reported resolution of this entry is 3.70 Å.

Percentile scores (ranging between 0-100) for global validation metrics of the entry are shown in the following graphic. The table shows the number of entries on which the scores are based.

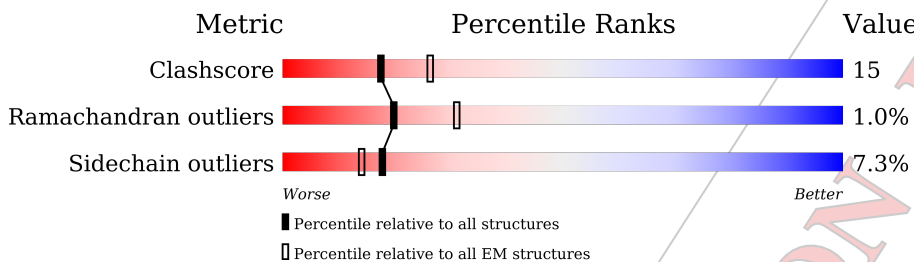

| Metric                | Whole archive (#Entries) | EM structures (#Entries) |
|-----------------------|--------------------------|--------------------------|
| Clashscore            | 158937                   | 4297                     |
| Ramachandran outliers | 154571                   | 4023                     |
| Sidechain outliers    | 154315                   | 3826                     |

The table below summarises the geometric issues observed across the polymeric chains and their fit to the map. The red, orange, yellow and green segments of the bar indicate the fraction of residues that contain outliers for  $\geq 3$ , 2, 1 and 0 types of geometric quality criteria respectively. A grey segment represents the fraction of residues that are not modelled. The numeric value for each fraction is indicated below the corresponding segment, with a dot representing fractions  $\leq 5\%$ . The upper red bar (where present) indicates the fraction of residues that have poor fit to the EM map (all-atom inclusion  $< 40\%$ ). The numeric value is given above the bar.

| Mol | Chain | Length | Quality of chain |
|-----|-------|--------|------------------|
| 1   | A     | 1016   | <br>19% 76% 20%  |
| 2   | B     | 1000   | <br>13% 76% 21%  |
| 3   | C     | 1000   | <br>14% 74% 23%  |
| 4   | O     | 118    | <br>52% 58% 42%  |
| 4   | P     | 118    | <br>34% 58% 42%  |
| 4   | U     | 118    | <br>78% 57% 42%  |
| 5   | Q     | 107    | <br>56% 61% 38%  |
| 5   | S     | 107    | <br>41% 61% 38%  |

Continued on next page...

Continued from previous page...

| Mol | Chain | Length | Quality of chain |
|-----|-------|--------|------------------|
| 5   | V     | 107    | 84%<br>59% 40%   |
| 6   | D     | 3      | 67%<br>33% 67%   |
| 6   | E     | 3      | 33% 67%          |
| 6   | F     | 3      | 33% 67%          |
| 7   | G     | 2      | 50% 50%          |
| 7   | H     | 2      | 100%             |
| 7   | I     | 2      | 50% 50%          |
| 7   | J     | 2      | 50% 50%          |
| 7   | K     | 2      | 50% 100%         |
| 7   | L     | 2      | 100%             |
| 7   | M     | 2      | 50% 100%         |
| 7   | N     | 2      | 100%             |
| 7   | R     | 2      | 50% 50%          |
| 7   | T     | 2      | 50% 100%         |

## 2 Entry composition i

There are 8 unique types of molecules in this entry. The entry contains 29187 atoms, of which 0 are hydrogens and 0 are deuteriums.

In the tables below, the AltConf column contains the number of residues with at least one atom in alternate conformation and the Trace column contains the number of residues modelled with at most 2 atoms.

- Molecule 1 is a protein called spike chain A.

| Mol | Chain | Residues | Atoms |      |      |      |    | AltConf | Trace |
|-----|-------|----------|-------|------|------|------|----|---------|-------|
|     |       |          | Total | C    | N    | O    | S  |         |       |
| 1   | A     | 1006     | 7761  | 4956 | 1292 | 1478 | 35 | 0       | 0     |

- Molecule 2 is a protein called chain B of spike.

| Mol | Chain | Residues | Atoms |      |      |      |    | AltConf | Trace |
|-----|-------|----------|-------|------|------|------|----|---------|-------|
|     |       |          | Total | C    | N    | O    | S  |         |       |
| 2   | B     | 1000     | 7732  | 4938 | 1283 | 1476 | 35 | 0       | 0     |

- Molecule 3 is a protein called chain C of spike.

| Mol | Chain | Residues | Atoms |      |      |      |    | AltConf | Trace |
|-----|-------|----------|-------|------|------|------|----|---------|-------|
|     |       |          | Total | C    | N    | O    | S  |         |       |
| 3   | C     | 1000     | 7677  | 4903 | 1270 | 1469 | 35 | 0       | 0     |

- Molecule 4 is a protein called heavy chain of R33.

| Mol | Chain | Residues | Atoms |     |     |     |   | AltConf | Trace |
|-----|-------|----------|-------|-----|-----|-----|---|---------|-------|
|     |       |          | Total | C   | N   | O   | S |         |       |
| 4   | U     | 118      | 928   | 594 | 151 | 178 | 5 | 0       | 0     |
| 4   | O     | 118      | 928   | 594 | 151 | 178 | 5 | 0       | 0     |
| 4   | P     | 118      | 928   | 594 | 151 | 178 | 5 | 0       | 0     |

- Molecule 5 is a protein called light chain of R33.

| Mol | Chain | Residues | Atoms |     |     |     |   | AltConf | Trace |
|-----|-------|----------|-------|-----|-----|-----|---|---------|-------|
|     |       |          | Total | C   | N   | O   | S |         |       |
| 5   | V     | 107      | 824   | 520 | 137 | 164 | 3 | 0       | 0     |
| 5   | Q     | 107      | 824   | 520 | 137 | 164 | 3 | 0       | 0     |

*Continued on next page...*

Continued from previous page...

| Mol | Chain | Residues | Atoms |     |     |     |   | AltConf | Trace |
|-----|-------|----------|-------|-----|-----|-----|---|---------|-------|
|     |       |          | Total | C   | N   | O   | S |         |       |
| 5   | S     | 107      | 824   | 520 | 137 | 164 | 3 | 0       | 0     |

- Molecule 6 is an oligosaccharide called beta-D-mannopyranose-(1-4)-2-acetamido-2-deoxy-beta-D-glucopyranose-(1-4)-2-acetamido-2-deoxy-beta-D-glucopyranose.

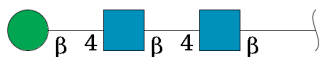

| Mol | Chain | Residues | Atoms |    |   |    | AltConf | Trace |
|-----|-------|----------|-------|----|---|----|---------|-------|
|     |       |          | Total | C  | N | O  |         |       |
| 6   | D     | 3        | 39    | 22 | 2 | 15 | 0       | 0     |
| 6   | E     | 3        | 39    | 22 | 2 | 15 | 0       | 0     |
| 6   | F     | 3        | 39    | 22 | 2 | 15 | 0       | 0     |

- Molecule 7 is an oligosaccharide called 2-acetamido-2-deoxy-beta-D-glucopyranose-(1-4)-2-acetamido-2-deoxy-beta-D-glucopyranose.

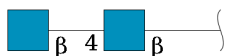

| Mol | Chain | Residues | Atoms |    |   |    | AltConf | Trace |
|-----|-------|----------|-------|----|---|----|---------|-------|
|     |       |          | Total | C  | N | O  |         |       |
| 7   | G     | 2        | 28    | 16 | 2 | 10 | 0       | 0     |
| 7   | H     | 2        | 28    | 16 | 2 | 10 | 0       | 0     |
| 7   | I     | 2        | 28    | 16 | 2 | 10 | 0       | 0     |
| 7   | J     | 2        | 28    | 16 | 2 | 10 | 0       | 0     |
| 7   | K     | 2        | 28    | 16 | 2 | 10 | 0       | 0     |
| 7   | L     | 2        | 28    | 16 | 2 | 10 | 0       | 0     |
| 7   | M     | 2        | 28    | 16 | 2 | 10 | 0       | 0     |
| 7   | N     | 2        | 28    | 16 | 2 | 10 | 0       | 0     |

Continued on next page...

Continued from previous page...

| Mol | Chain | Residues | Atoms |    |   | AltConf | Trace |   |
|-----|-------|----------|-------|----|---|---------|-------|---|
|     |       |          | Total | C  | N |         |       | O |
| 7   | R     | 2        | Total | C  | N | O       | 0     | 0 |
|     |       |          | 28    | 16 | 2 | 10      |       |   |
| 7   | T     | 2        | Total | C  | N | O       | 0     | 0 |
|     |       |          | 28    | 16 | 2 | 10      |       |   |

- Molecule 8 is 2-acetamido-2-deoxy-beta-D-glucopyranose (three-letter code: NAG) (formula:  $C_8H_{15}NO_6$ ).

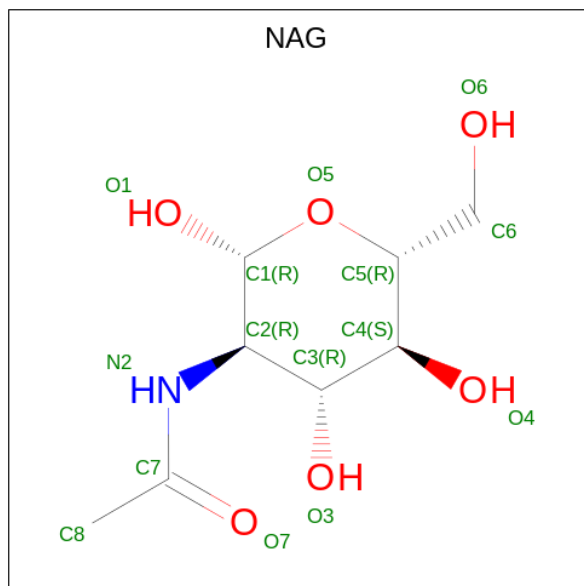

| Mol | Chain | Residues | Atoms |    |    | AltConf |   |
|-----|-------|----------|-------|----|----|---------|---|
|     |       |          | Total | C  | N  |         | O |
| 8   | A     | 1        | Total | C  | N  | O       | 0 |
|     |       |          | 98    | 56 | 7  | 35      |   |
| 8   | A     | 1        | Total | C  | N  | O       | 0 |
|     |       |          | 98    | 56 | 7  | 35      |   |
| 8   | A     | 1        | Total | C  | N  | O       | 0 |
|     |       |          | 98    | 56 | 7  | 35      |   |
| 8   | A     | 1        | Total | C  | N  | O       | 0 |
|     |       |          | 98    | 56 | 7  | 35      |   |
| 8   | A     | 1        | Total | C  | N  | O       | 0 |
|     |       |          | 98    | 56 | 7  | 35      |   |
| 8   | A     | 1        | Total | C  | N  | O       | 0 |
|     |       |          | 98    | 56 | 7  | 35      |   |
| 8   | B     | 1        | Total | C  | N  | O       | 0 |
|     |       |          | 154   | 88 | 11 | 55      |   |
| 8   | B     | 1        | Total | C  | N  | O       | 0 |
|     |       |          | 154   | 88 | 11 | 55      |   |

Continued on next page...

*Continued from previous page...*

| Mol | Chain | Residues | Atoms        |    |    |    | AltConf |
|-----|-------|----------|--------------|----|----|----|---------|
|     |       |          | Total        | C  | N  | O  |         |
| 8   | B     | 1        | Total<br>154 | 88 | 11 | 55 | 0       |
| 8   | B     | 1        | Total<br>154 | 88 | 11 | 55 | 0       |
| 8   | B     | 1        | Total<br>154 | 88 | 11 | 55 | 0       |
| 8   | B     | 1        | Total<br>154 | 88 | 11 | 55 | 0       |
| 8   | B     | 1        | Total<br>154 | 88 | 11 | 55 | 0       |
| 8   | B     | 1        | Total<br>154 | 88 | 11 | 55 | 0       |
| 8   | B     | 1        | Total<br>154 | 88 | 11 | 55 | 0       |
| 8   | B     | 1        | Total<br>154 | 88 | 11 | 55 | 0       |
| 8   | B     | 1        | Total<br>154 | 88 | 11 | 55 | 0       |
| 8   | C     | 1        | Total<br>112 | 64 | 8  | 40 | 0       |
| 8   | C     | 1        | Total<br>112 | 64 | 8  | 40 | 0       |
| 8   | C     | 1        | Total<br>112 | 64 | 8  | 40 | 0       |
| 8   | C     | 1        | Total<br>112 | 64 | 8  | 40 | 0       |
| 8   | C     | 1        | Total<br>112 | 64 | 8  | 40 | 0       |
| 8   | C     | 1        | Total<br>112 | 64 | 8  | 40 | 0       |
| 8   | C     | 1        | Total<br>112 | 64 | 8  | 40 | 0       |
| 8   | C     | 1        | Total<br>112 | 64 | 8  | 40 | 0       |

### 3 Residue-property plots

These plots are drawn for all protein, RNA, DNA and oligosaccharide chains in the entry. The first graphic for a chain summarises the proportions of the various outlier classes displayed in the second graphic. The second graphic shows the sequence view annotated by issues in geometry and atom inclusion in map density. Residues are color-coded according to the number of geometric quality criteria for which they contain at least one outlier: green = 0, yellow = 1, orange = 2 and red = 3 or more. A red diamond above a residue indicates a poor fit to the EM map for this residue (all-atom inclusion < 40%). Stretches of 2 or more consecutive residues without any outlier are shown as a green connector. Residues present in the sample, but not in the model, are shown in grey.

- Molecule 1: spike chain A

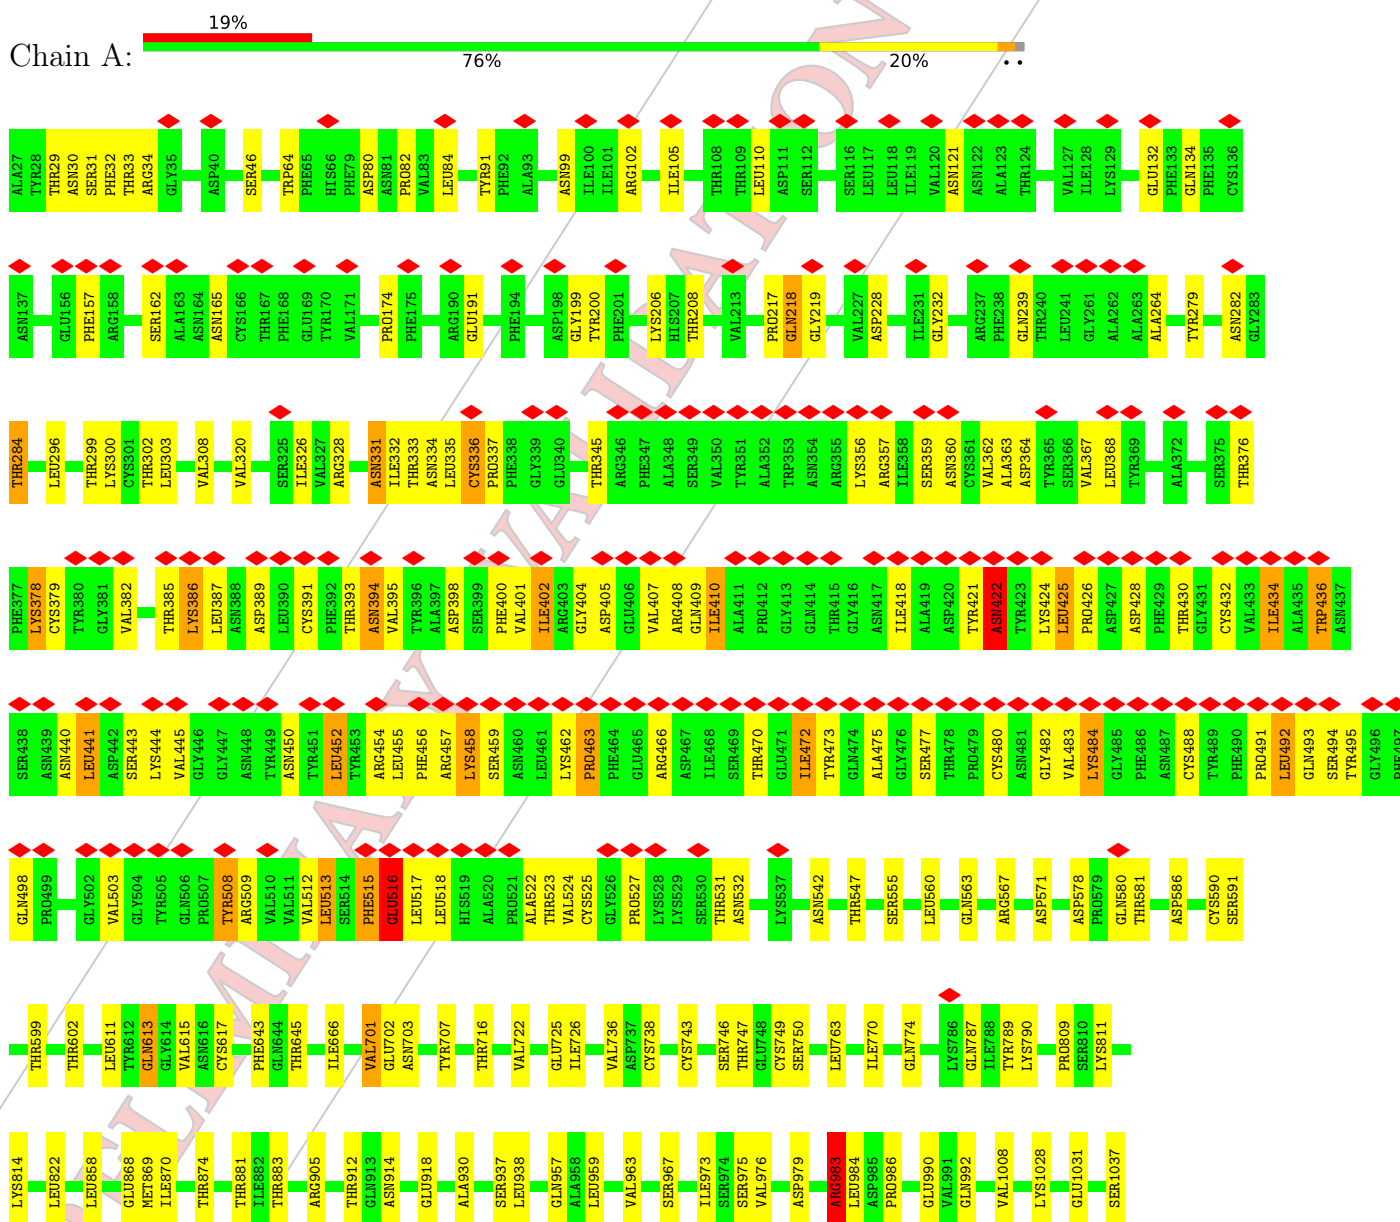



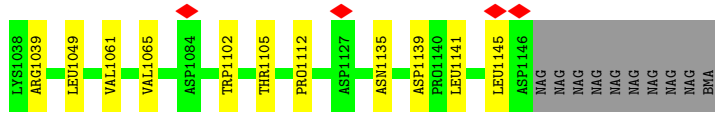

• Molecule 2: chain B of spike

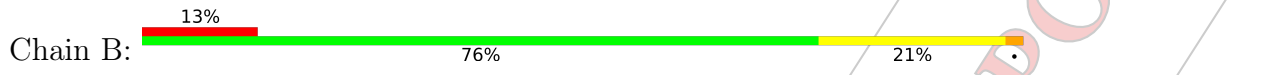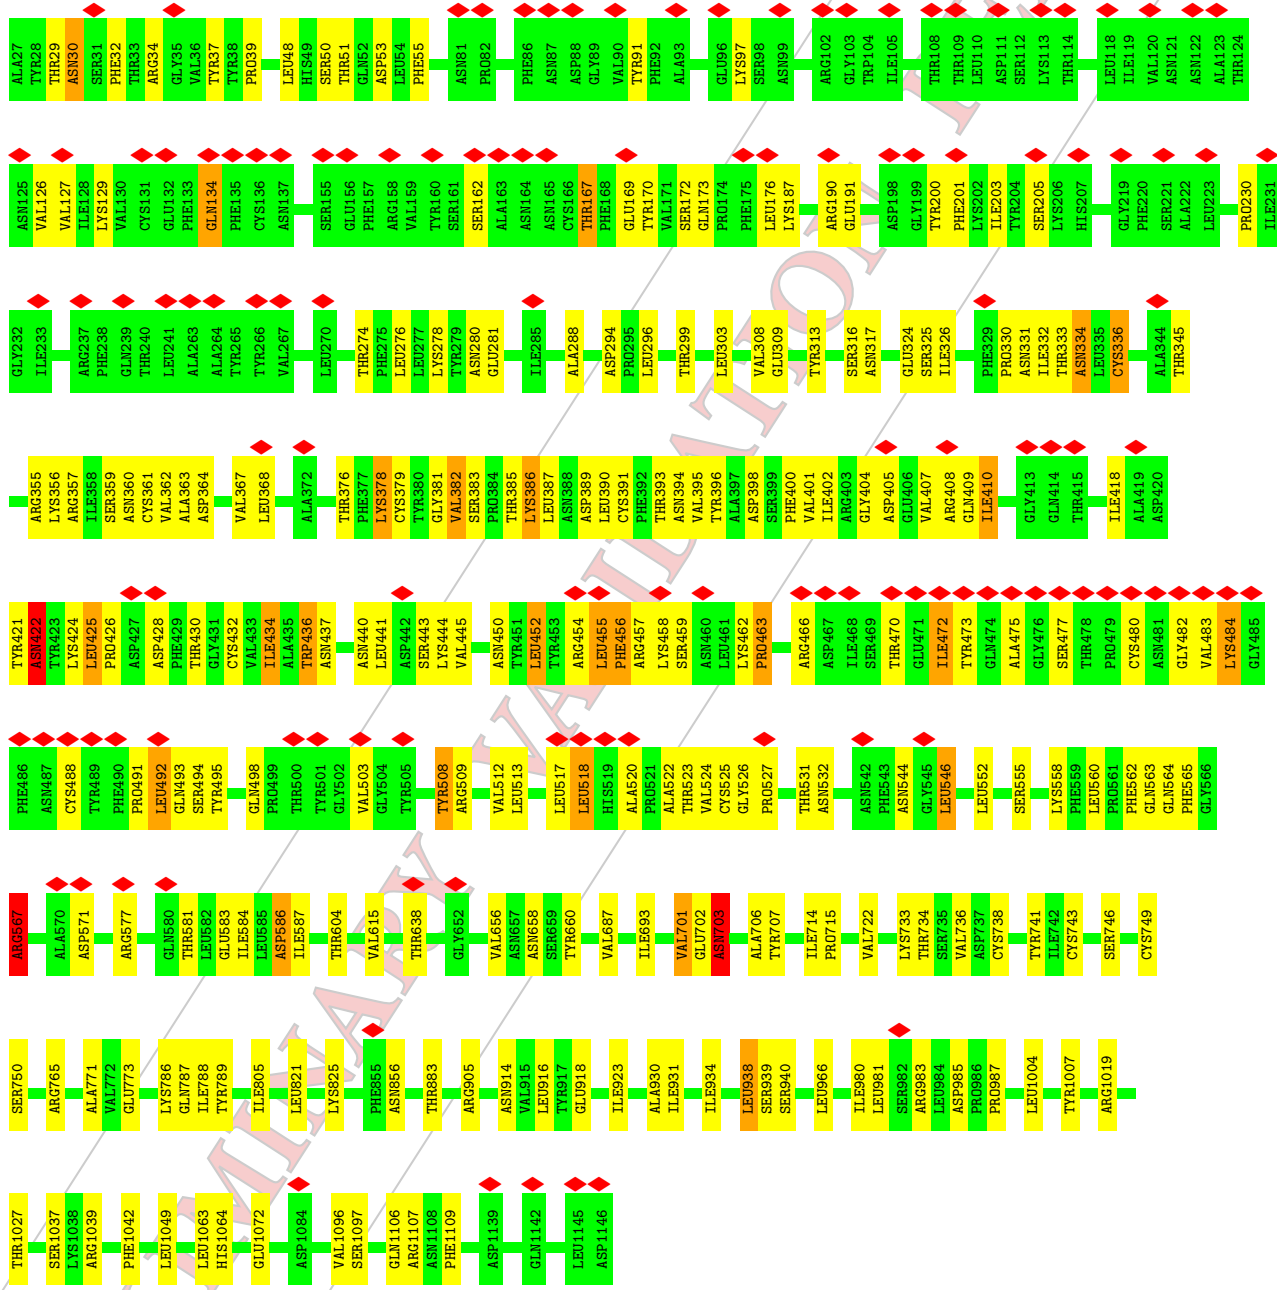

• Molecule 3: chain C of spike

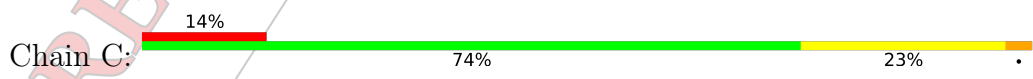

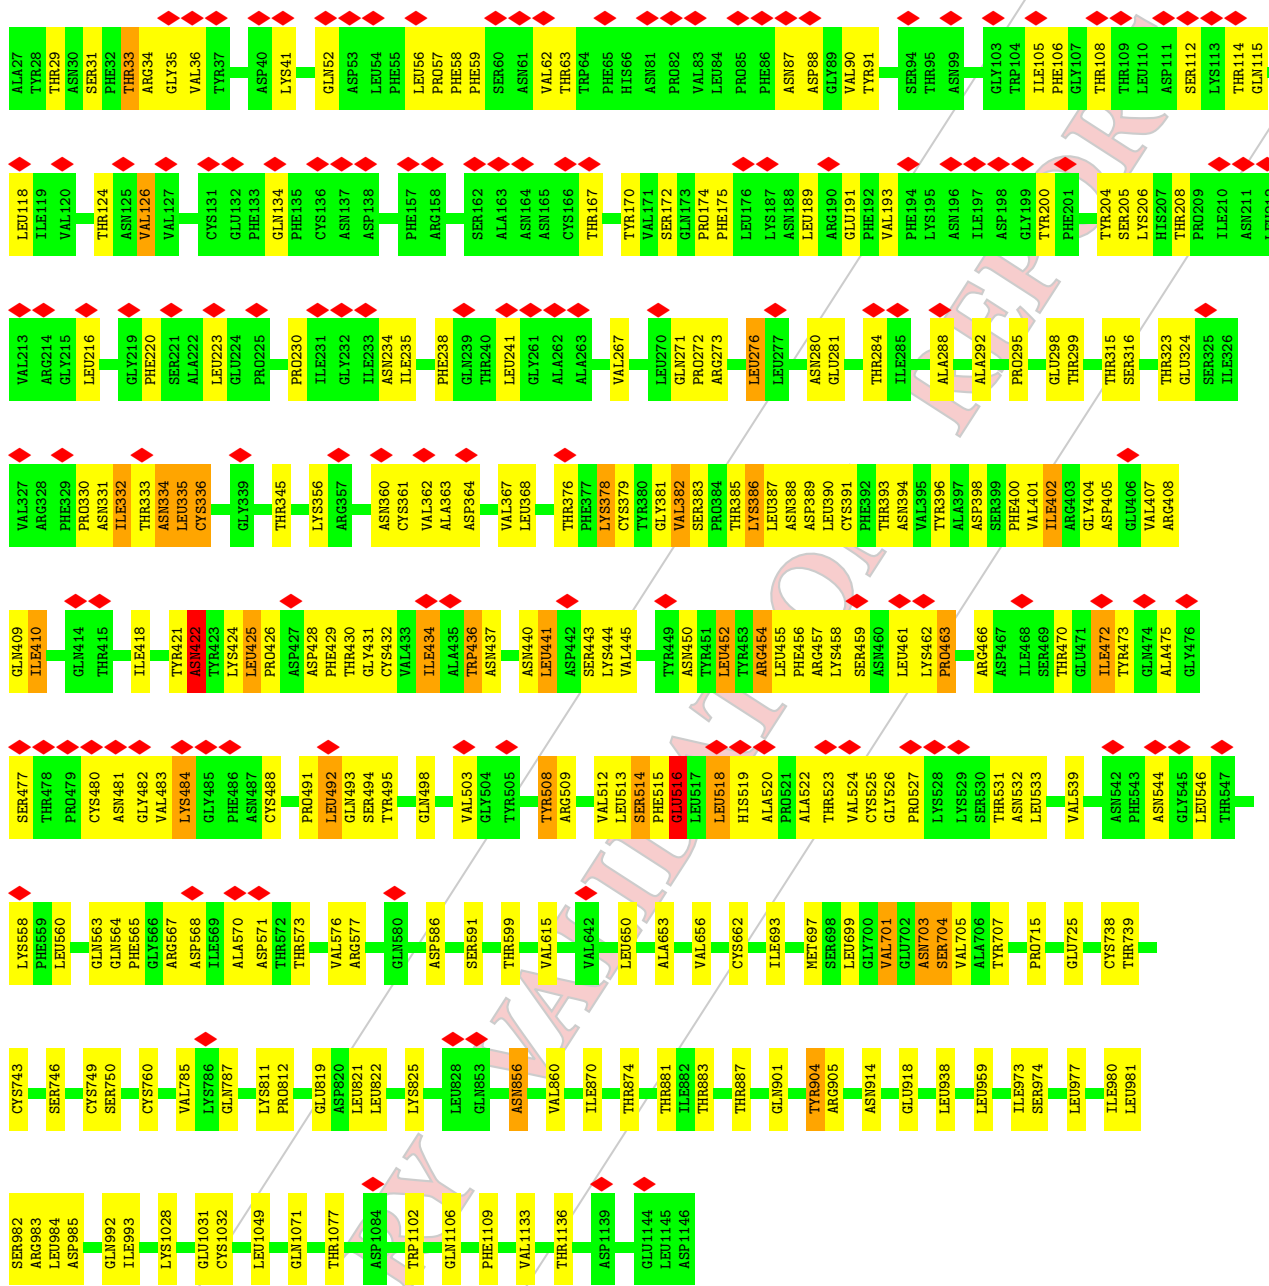

• Molecule 4: heavy chain of R33

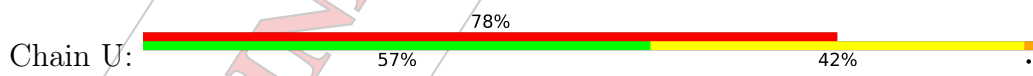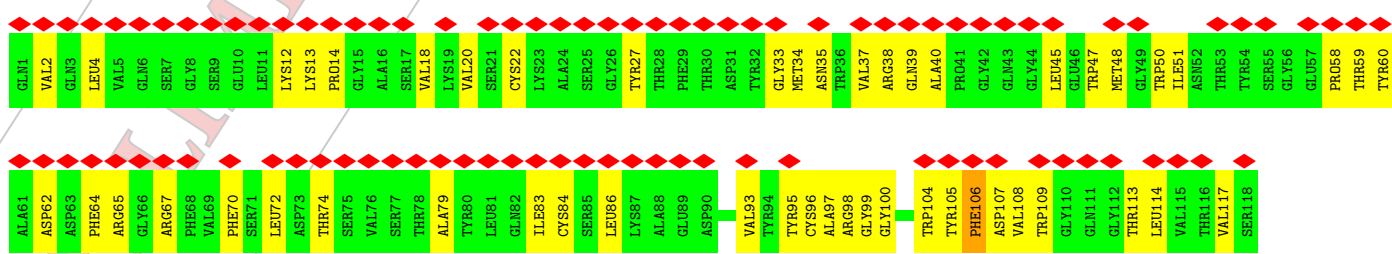

• Molecule 4: heavy chain of R33

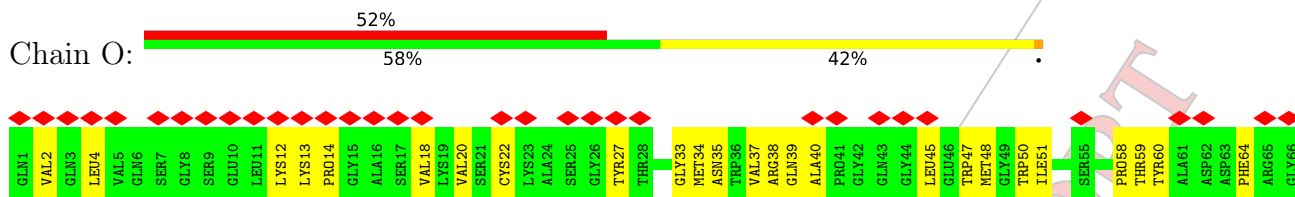

- Molecule 4: heavy chain of R33

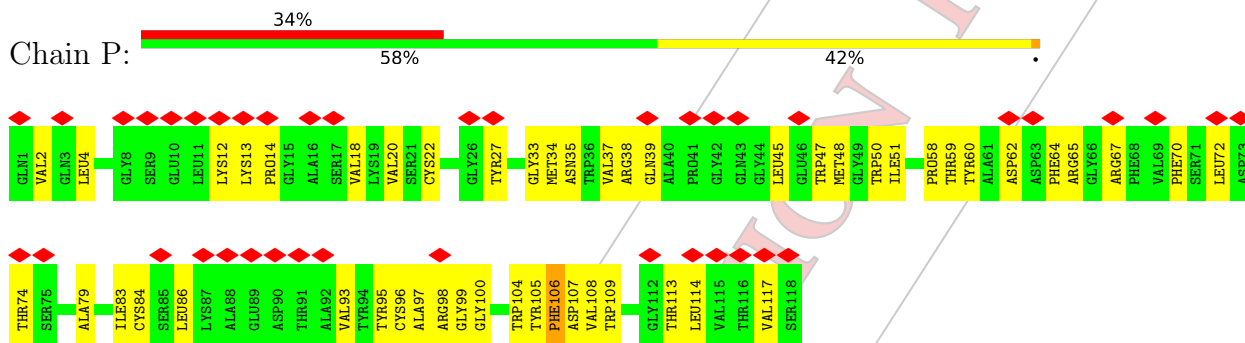

- Molecule 5: light chain of R33

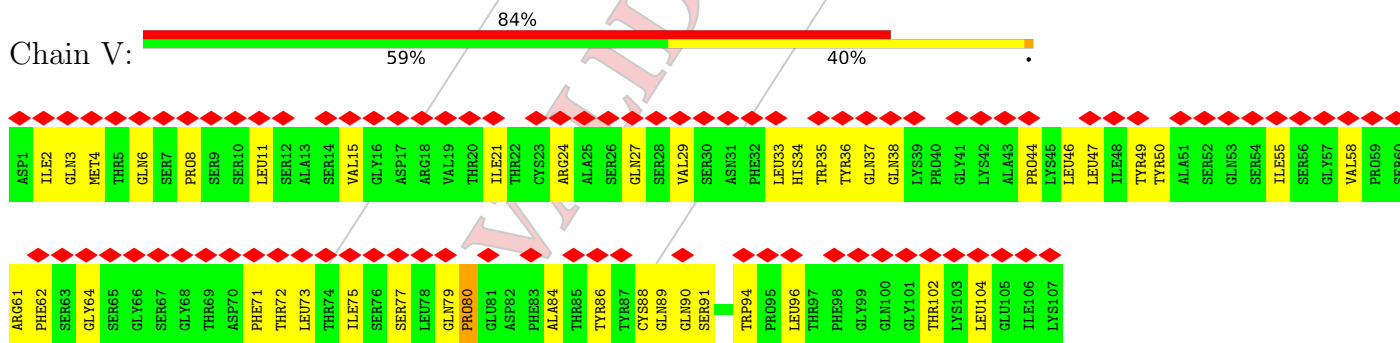

- Molecule 5: light chain of R33

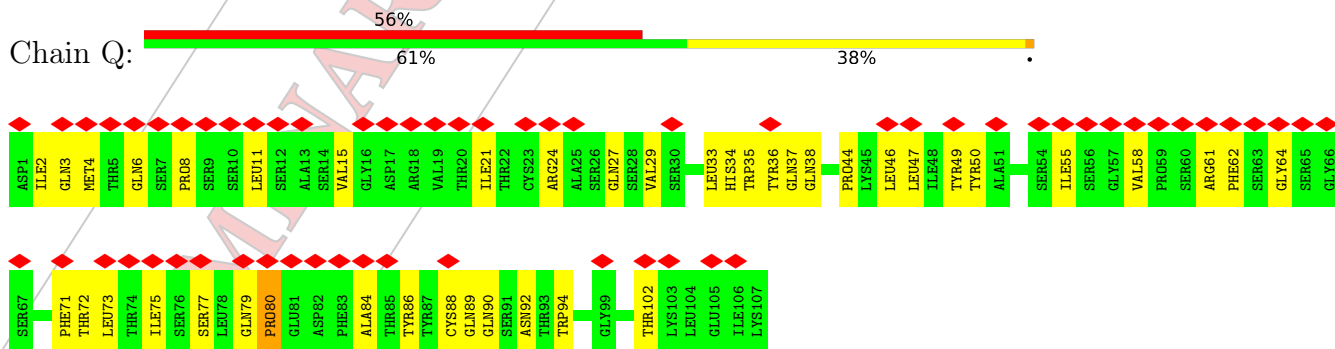

- Molecule 5: light chain of R33

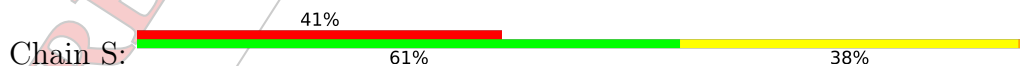

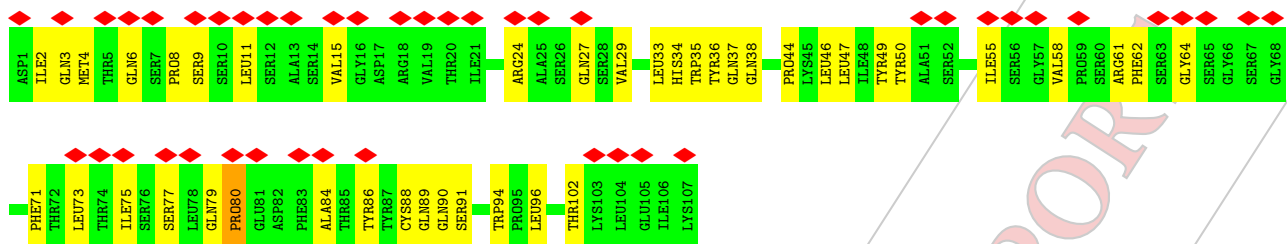

- Molecule 6: beta-D-mannopyranose-(1-4)-2-acetamido-2-deoxy-beta-D-glucopyranose-(1-4)-2-acetamido-2-deoxy-beta-D-glucopyranose

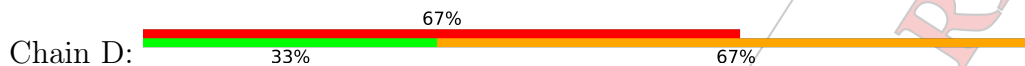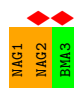

- Molecule 6: beta-D-mannopyranose-(1-4)-2-acetamido-2-deoxy-beta-D-glucopyranose-(1-4)-2-acetamido-2-deoxy-beta-D-glucopyranose

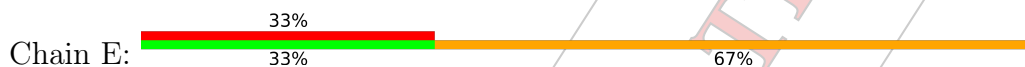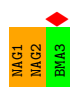

- Molecule 6: beta-D-mannopyranose-(1-4)-2-acetamido-2-deoxy-beta-D-glucopyranose-(1-4)-2-acetamido-2-deoxy-beta-D-glucopyranose

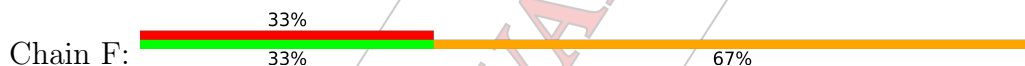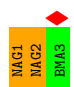

- Molecule 7: 2-acetamido-2-deoxy-beta-D-glucopyranose-(1-4)-2-acetamido-2-deoxy-beta-D-glucopyranose

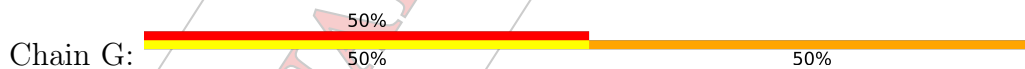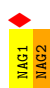

- Molecule 7: 2-acetamido-2-deoxy-beta-D-glucopyranose-(1-4)-2-acetamido-2-deoxy-beta-D-glucopyranose

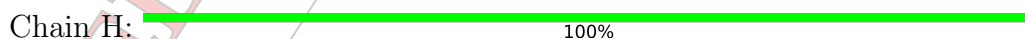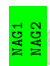

- Molecule 7: 2-acetamido-2-deoxy-beta-D-glucopyranose-(1-4)-2-acetamido-2-deoxy-beta-D-glucopyranose

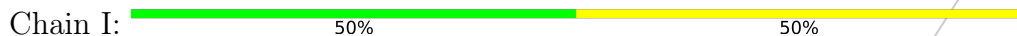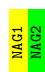

- Molecule 7: 2-acetamido-2-deoxy-beta-D-glucopyranose-(1-4)-2-acetamido-2-deoxy-beta-D-glucopyranose

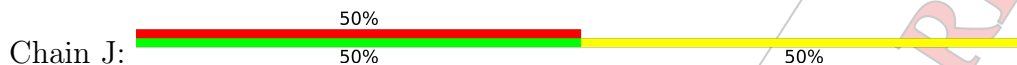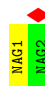

- Molecule 7: 2-acetamido-2-deoxy-beta-D-glucopyranose-(1-4)-2-acetamido-2-deoxy-beta-D-glucopyranose

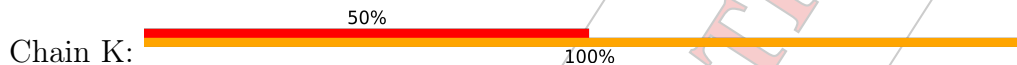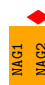

- Molecule 7: 2-acetamido-2-deoxy-beta-D-glucopyranose-(1-4)-2-acetamido-2-deoxy-beta-D-glucopyranose

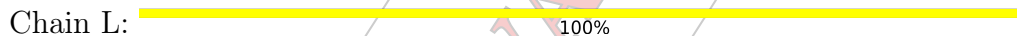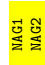

- Molecule 7: 2-acetamido-2-deoxy-beta-D-glucopyranose-(1-4)-2-acetamido-2-deoxy-beta-D-glucopyranose

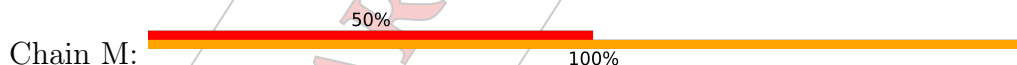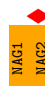

- Molecule 7: 2-acetamido-2-deoxy-beta-D-glucopyranose-(1-4)-2-acetamido-2-deoxy-beta-D-glucopyranose

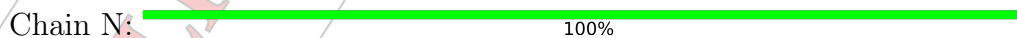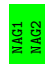

PRELIMINARY

VALIDATION REPORT

- Molecule 7: 2-acetamido-2-deoxy-beta-D-glucopyranose-(1-4)-2-acetamido-2-deoxy-beta-D-glucopyranose

Chain R:  50% 50%

  
NAG1  
NAG2

- Molecule 7: 2-acetamido-2-deoxy-beta-D-glucopyranose-(1-4)-2-acetamido-2-deoxy-beta-D-glucopyranose

Chain T:  50% 100%

  
NAG1  
NAG2

PRELIMINARY VALIDATION REPORT

## 4 Experimental information i

| Property                             | Value                           | Source    |
|--------------------------------------|---------------------------------|-----------|
| EM reconstruction method             | SINGLE PARTICLE                 | Depositor |
| Imposed symmetry                     | POINT, Not provided             |           |
| Number of particles used             | Not provided                    |           |
| Resolution determination method      | Not provided                    |           |
| CTF correction method                | Not provided                    |           |
| Microscope                           | Not provided                    |           |
| Voltage (kV)                         | Not provided                    |           |
| Electron dose ( $e^-/\text{\AA}^2$ ) | Not provided                    |           |
| Minimum defocus (nm)                 | Not provided                    |           |
| Maximum defocus (nm)                 | Not provided                    |           |
| Magnification                        | Not provided                    |           |
| Image detector                       | Not provided                    |           |
| Maximum map value                    | 1.657                           | Depositor |
| Minimum map value                    | -0.780                          | Depositor |
| Average map value                    | -0.000                          | Depositor |
| Map value standard deviation         | 0.036                           | Depositor |
| Recommended contour level            | 0.177                           | Depositor |
| Map size ( $\text{\AA}$ )            | 432.00003, 432.00003, 432.00003 | wwPDB     |
| Map dimensions                       | 400, 400, 400                   | wwPDB     |
| Map angles ( $^\circ$ )              | 90.0, 90.0, 90.0                | wwPDB     |
| Pixel spacing ( $\text{\AA}$ )       | 1.08, 1.08, 1.08                | Depositor |

## 5 Model quality i

### 5.1 Standard geometry i

Bond lengths and bond angles in the following residue types are not validated in this section: NAG, BMA

The Z score for a bond length (or angle) is the number of standard deviations the observed value is removed from the expected value. A bond length (or angle) with  $|Z| > 5$  is considered an outlier worth inspection. RMSZ is the root-mean-square of all Z scores of the bond lengths (or angles).

| Mol | Chain | Bond lengths |                 | Bond angles |                 |
|-----|-------|--------------|-----------------|-------------|-----------------|
|     |       | RMSZ         | # Z  >5         | RMSZ        | # Z  >5         |
| 1   | A     | 1.33         | 6/7936 (0.1%)   | 0.83        | 7/10811 (0.1%)  |
| 2   | B     | 0.51         | 1/7907 (0.0%)   | 0.66        | 5/10768 (0.0%)  |
| 3   | C     | 0.52         | 3/7851 (0.0%)   | 0.66        | 3/10703 (0.0%)  |
| 4   | O     | 0.51         | 0/955           | 0.60        | 0/1300          |
| 4   | P     | 0.51         | 0/955           | 0.60        | 0/1300          |
| 4   | U     | 0.51         | 0/955           | 0.60        | 0/1300          |
| 5   | Q     | 0.44         | 0/844           | 0.63        | 1/1146 (0.1%)   |
| 5   | S     | 0.44         | 0/844           | 0.62        | 1/1146 (0.1%)   |
| 5   | V     | 0.44         | 0/844           | 0.63        | 1/1146 (0.1%)   |
| All | All   | 0.82         | 10/29091 (0.0%) | 0.70        | 18/39620 (0.0%) |

Chiral center outliers are detected by calculating the chiral volume of a chiral center and verifying if the center is modelled as a planar moiety or with the opposite hand. A planarity outlier is detected by checking planarity of atoms in a peptide group, atoms in a mainchain group or atoms of a sidechain that are expected to be planar.

| Mol | Chain | #Chirality outliers | #Planarity outliers |
|-----|-------|---------------------|---------------------|
| 1   | A     | 1                   | 2                   |
| 2   | B     | 0                   | 2                   |
| 4   | O     | 0                   | 1                   |
| 4   | P     | 0                   | 1                   |
| 4   | U     | 0                   | 1                   |
| 5   | Q     | 0                   | 1                   |
| 5   | S     | 0                   | 1                   |
| 5   | V     | 0                   | 1                   |
| All | All   | 1                   | 10                  |

All (10) bond length outliers are listed below:

| Mol | Chain | Res | Type | Atoms | Z     | Observed(Å) | Ideal(Å) |
|-----|-------|-----|------|-------|-------|-------------|----------|
| 1   | A     | 516 | GLU  | CB-CG | 87.00 | 3.17        | 1.52     |

Continued on next page...



Continued from previous page...

| Mol | Chain | Res | Type | Atoms | Z     | Observed(Å) | Ideal(Å) |
|-----|-------|-----|------|-------|-------|-------------|----------|
| 1   | A     | 516 | GLU  | CA-CB | 64.02 | 2.94        | 1.53     |
| 1   | A     | 516 | GLU  | CG-CD | 15.03 | 1.74        | 1.51     |
| 3   | C     | 336 | CYS  | N-CA  | -9.02 | 1.28        | 1.46     |
| 1   | A     | 516 | GLU  | N-CA  | 8.44  | 1.63        | 1.46     |
| 3   | C     | 336 | CYS  | CA-CB | -7.49 | 1.37        | 1.53     |
| 2   | B     | 336 | CYS  | CA-CB | -7.15 | 1.38        | 1.53     |
| 3   | C     | 336 | CYS  | CB-SG | 6.85  | 1.93        | 1.82     |
| 1   | A     | 336 | CYS  | CA-CB | -5.42 | 1.42        | 1.53     |
| 1   | A     | 515 | PHE  | C-N   | 5.29  | 1.46        | 1.34     |

All (18) bond angle outliers are listed below:

| Mol | Chain | Res  | Type | Atoms     | Z      | Observed(°) | Ideal(°) |
|-----|-------|------|------|-----------|--------|-------------|----------|
| 1   | A     | 516  | GLU  | CA-CB-CG  | -47.55 | 8.80        | 113.40   |
| 1   | A     | 516  | GLU  | N-CA-CB   | 14.55  | 136.78      | 110.60   |
| 2   | B     | 30   | ASN  | C-N-CA    | 9.23   | 144.79      | 121.70   |
| 5   | V     | 80   | PRO  | CA-N-CD   | -8.89  | 99.05       | 111.50   |
| 5   | Q     | 80   | PRO  | CA-N-CD   | -8.88  | 99.07       | 111.50   |
| 5   | S     | 80   | PRO  | CA-N-CD   | -8.88  | 99.08       | 111.50   |
| 3   | C     | 703  | ASN  | CB-CA-C   | -7.92  | 94.56       | 110.40   |
| 2   | B     | 567  | ARG  | NE-CZ-NH2 | -7.30  | 116.65      | 120.30   |
| 1   | A     | 983  | ARG  | NE-CZ-NH2 | -6.45  | 117.08      | 120.30   |
| 2   | B     | 938  | LEU  | CA-CB-CG  | 6.03   | 129.18      | 115.30   |
| 1   | A     | 515  | PHE  | C-N-CA    | 5.85   | 136.32      | 121.70   |
| 1   | A     | 617  | CYS  | CA-CB-SG  | 5.67   | 124.20      | 114.00   |
| 3   | C     | 1032 | CYS  | CA-CB-SG  | 5.55   | 123.99      | 114.00   |
| 1   | A     | 436  | TRP  | CA-CB-CG  | 5.33   | 123.84      | 113.70   |
| 3   | C     | 436  | TRP  | CA-CB-CG  | 5.33   | 123.83      | 113.70   |
| 2   | B     | 436  | TRP  | CA-CB-CG  | 5.31   | 123.80      | 113.70   |
| 2   | B     | 546  | LEU  | CA-CB-CG  | 5.15   | 127.15      | 115.30   |
| 1   | A     | 336  | CYS  | CB-CA-C   | 5.05   | 120.51      | 110.40   |

All (1) chirality outliers are listed below:

| Mol | Chain | Res | Type | Atom |
|-----|-------|-----|------|------|
| 1   | A     | 516 | GLU  | CA   |

All (10) planarity outliers are listed below:

| Mol | Chain | Res | Type | Group     |
|-----|-------|-----|------|-----------|
| 1   | A     | 513 | LEU  | Mainchain |
| 1   | A     | 983 | ARG  | Sidechain |

Continued on next page...

Continued from previous page...

| Mol | Chain | Res | Type | Group     |
|-----|-------|-----|------|-----------|
| 2   | B     | 333 | THR  | Peptide   |
| 2   | B     | 567 | ARG  | Sidechain |
| 4   | O     | 106 | PHE  | Peptide   |
| 4   | P     | 106 | PHE  | Peptide   |
| 5   | Q     | 29  | VAL  | Peptide   |
| 5   | S     | 29  | VAL  | Peptide   |
| 4   | U     | 106 | PHE  | Peptide   |
| 5   | V     | 29  | VAL  | Peptide   |

## 5.2 Too-close contacts [i](#)

In the following table, the Non-H and H(model) columns list the number of non-hydrogen atoms and hydrogen atoms in the chain respectively. The H(added) column lists the number of hydrogen atoms added and optimized by MolProbity. The Clashes column lists the number of clashes within the asymmetric unit, whereas Symm-Clashes lists symmetry-related clashes.

| Mol | Chain | Non-H | H(model) | H(added) | Clashes | Symm-Clashes |
|-----|-------|-------|----------|----------|---------|--------------|
| 1   | A     | 7761  | 0        | 7507     | 221     | 0            |
| 2   | B     | 7732  | 0        | 7480     | 238     | 0            |
| 3   | C     | 7677  | 0        | 7374     | 233     | 0            |
| 4   | O     | 928   | 0        | 869      | 57      | 0            |
| 4   | P     | 928   | 0        | 869      | 54      | 0            |
| 4   | U     | 928   | 0        | 869      | 55      | 0            |
| 5   | Q     | 824   | 0        | 801      | 39      | 0            |
| 5   | S     | 824   | 0        | 801      | 39      | 0            |
| 5   | V     | 824   | 0        | 801      | 42      | 0            |
| 6   | D     | 39    | 0        | 34       | 1       | 0            |
| 6   | E     | 39    | 0        | 34       | 1       | 0            |
| 6   | F     | 39    | 0        | 34       | 1       | 0            |
| 7   | G     | 28    | 0        | 25       | 1       | 0            |
| 7   | H     | 28    | 0        | 25       | 0       | 0            |
| 7   | I     | 28    | 0        | 25       | 0       | 0            |
| 7   | J     | 28    | 0        | 25       | 0       | 0            |
| 7   | K     | 28    | 0        | 25       | 2       | 0            |
| 7   | L     | 28    | 0        | 25       | 1       | 0            |
| 7   | M     | 28    | 0        | 25       | 2       | 0            |
| 7   | N     | 28    | 0        | 25       | 0       | 0            |
| 7   | R     | 28    | 0        | 25       | 0       | 0            |
| 7   | T     | 28    | 0        | 25       | 0       | 0            |
| 8   | A     | 98    | 0        | 91       | 3       | 0            |
| 8   | B     | 154   | 0        | 143      | 1       | 0            |
| 8   | C     | 112   | 0        | 104      | 2       | 0            |

Continued on next page...

Continued from previous page...

| Mol | Chain | Non-H | H(model) | H(added) | Clashes | Symm-Clashes |
|-----|-------|-------|----------|----------|---------|--------------|
| All | All   | 29187 | 0        | 28061    | 867     | 0            |

The all-atom clashscore is defined as the number of clashes found per 1000 atoms (including hydrogen atoms). The all-atom clashscore for this structure is 15.

All (867) close contacts within the same asymmetric unit are listed below, sorted by their clash magnitude.

| Atom-1           | Atom-2           | Interatomic distance (Å) | Clash overlap (Å) |
|------------------|------------------|--------------------------|-------------------|
| 1:A:357:ARG:HH12 | 2:B:167:THR:CA   | 1.12                     | 1.63              |
| 2:B:363:ALA:CB   | 2:B:524:VAL:HG22 | 1.27                     | 1.55              |
| 3:C:363:ALA:HB2  | 3:C:524:VAL:CG1  | 1.30                     | 1.53              |
| 1:A:395:VAL:HG23 | 1:A:524:VAL:CG1  | 1.39                     | 1.53              |
| 1:A:516:GLU:CD   | 1:A:516:GLU:CG   | 1.74                     | 1.53              |
| 3:C:363:ALA:CB   | 3:C:524:VAL:CG1  | 1.92                     | 1.46              |
| 2:B:363:ALA:CB   | 2:B:524:VAL:CG2  | 1.85                     | 1.41              |
| 2:B:391:CYS:SG   | 2:B:544:ASN:CA   | 2.11                     | 1.39              |
| 2:B:363:ALA:HB2  | 2:B:524:VAL:CG2  | 0.89                     | 1.35              |
| 2:B:391:CYS:SG   | 2:B:544:ASN:HB2  | 1.66                     | 1.34              |
| 2:B:391:CYS:SG   | 2:B:544:ASN:CB   | 2.17                     | 1.33              |
| 2:B:386:LYS:HD2  | 3:C:983:ARG:C    | 1.47                     | 1.32              |
| 2:B:391:CYS:HB2  | 2:B:544:ASN:O    | 1.31                     | 1.30              |
| 2:B:382:VAL:HG13 | 3:C:983:ARG:CD   | 1.62                     | 1.29              |
| 1:A:357:ARG:NH1  | 2:B:167:THR:CA   | 1.90                     | 1.28              |
| 2:B:383:SER:CB   | 3:C:984:LEU:HA   | 1.62                     | 1.27              |
| 1:A:362:VAL:CG1  | 1:A:527:PRO:HA   | 1.66                     | 1.25              |
| 1:A:357:ARG:NH1  | 2:B:167:THR:HA   | 1.44                     | 1.23              |
| 2:B:357:ARG:NE   | 3:C:230:PRO:CG   | 1.95                     | 1.23              |
| 2:B:393:THR:HB   | 2:B:520:ALA:O    | 1.40                     | 1.22              |
| 1:A:394:ASN:ND2  | 1:A:516:GLU:CB   | 2.03                     | 1.21              |
| 2:B:361:CYS:O    | 2:B:524:VAL:HA   | 1.38                     | 1.19              |
| 3:C:391:CYS:HB2  | 3:C:544:ASN:O    | 1.37                     | 1.19              |
| 1:A:357:ARG:HH12 | 2:B:167:THR:CB   | 1.55                     | 1.19              |
| 1:A:394:ASN:H    | 1:A:516:GLU:CG   | 1.57                     | 1.18              |
| 2:B:383:SER:HB3  | 3:C:983:ARG:O    | 1.02                     | 1.17              |
| 2:B:391:CYS:SG   | 2:B:544:ASN:C    | 2.23                     | 1.16              |
| 2:B:391:CYS:CB   | 2:B:544:ASN:O    | 1.92                     | 1.16              |
| 2:B:357:ARG:NE   | 3:C:230:PRO:HG3  | 1.55                     | 1.16              |
| 2:B:336:CYS:SG   | 2:B:524:VAL:HG23 | 1.85                     | 1.15              |
| 1:A:362:VAL:CG1  | 1:A:527:PRO:CA   | 2.24                     | 1.15              |
| 3:C:363:ALA:HB3  | 3:C:524:VAL:HG12 | 1.25                     | 1.14              |
| 2:B:383:SER:CB   | 3:C:983:ARG:O    | 1.95                     | 1.12              |

Continued on next page...

Continued from previous page...

| Atom-1           | Atom-2           | Interatomic distance (Å) | Clash overlap (Å) |
|------------------|------------------|--------------------------|-------------------|
| 1:A:393:THR:C    | 1:A:516:GLU:CB   | 2.18                     | 1.12              |
| 1:A:395:VAL:HG23 | 1:A:524:VAL:HG13 | 1.29                     | 1.11              |
| 2:B:391:CYS:SG   | 2:B:544:ASN:HA   | 1.90                     | 1.11              |
| 2:B:361:CYS:N    | 2:B:523:THR:O    | 1.80                     | 1.11              |
| 1:A:362:VAL:HG13 | 1:A:527:PRO:HA   | 1.35                     | 1.08              |
| 2:B:383:SER:HB2  | 3:C:984:LEU:HD23 | 1.31                     | 1.08              |
| 3:C:363:ALA:HB2  | 3:C:524:VAL:HG11 | 1.26                     | 1.08              |
| 3:C:363:ALA:CB   | 3:C:524:VAL:HG12 | 1.80                     | 1.08              |
| 2:B:382:VAL:CG1  | 3:C:983:ARG:HD2  | 1.85                     | 1.06              |
| 2:B:383:SER:CB   | 3:C:984:LEU:HD23 | 1.83                     | 1.06              |
| 2:B:334:ASN:HD22 | 2:B:361:CYS:HA   | 1.20                     | 1.06              |
| 1:A:395:VAL:CG2  | 1:A:524:VAL:CG1  | 2.32                     | 1.06              |
| 2:B:363:ALA:HB2  | 2:B:524:VAL:HG23 | 1.14                     | 1.06              |
| 1:A:394:ASN:H    | 1:A:516:GLU:HA   | 1.03                     | 1.05              |
| 2:B:357:ARG:HE   | 3:C:230:PRO:CG   | 1.60                     | 1.05              |
| 1:A:395:VAL:HG23 | 1:A:524:VAL:HG11 | 1.08                     | 1.05              |
| 1:A:394:ASN:H    | 1:A:516:GLU:HG2  | 1.13                     | 1.05              |
| 2:B:363:ALA:HB2  | 2:B:524:VAL:HG21 | 1.38                     | 1.05              |
| 2:B:383:SER:HB2  | 3:C:984:LEU:CA   | 1.86                     | 1.04              |
| 2:B:383:SER:HB2  | 3:C:984:LEU:CD2  | 1.88                     | 1.04              |
| 3:C:363:ALA:HB2  | 3:C:524:VAL:HG13 | 1.08                     | 1.03              |
| 2:B:359:SER:CA   | 2:B:523:THR:HG21 | 1.86                     | 1.03              |
| 2:B:363:ALA:N    | 2:B:525:CYS:O    | 1.92                     | 1.03              |
| 2:B:382:VAL:HG13 | 3:C:983:ARG:HD2  | 1.04                     | 1.02              |
| 1:A:395:VAL:CG2  | 1:A:524:VAL:HG11 | 1.90                     | 1.01              |
| 1:A:393:THR:OG1  | 1:A:516:GLU:CB   | 2.08                     | 1.01              |
| 2:B:357:ARG:HE   | 3:C:230:PRO:HG2  | 1.23                     | 1.01              |
| 2:B:334:ASN:ND2  | 2:B:361:CYS:HA   | 1.74                     | 1.01              |
| 2:B:363:ALA:O    | 2:B:526:GLY:HA2  | 1.59                     | 1.00              |
| 2:B:382:VAL:HG12 | 3:C:983:ARG:HB2  | 1.44                     | 1.00              |
| 1:A:395:VAL:HG21 | 1:A:524:VAL:CG2  | 1.91                     | 1.00              |
| 2:B:363:ALA:HB3  | 2:B:524:VAL:HG22 | 1.41                     | 1.00              |
| 3:C:393:THR:CG2  | 3:C:520:ALA:O    | 2.10                     | 1.00              |
| 2:B:336:CYS:SG   | 2:B:524:VAL:CG2  | 2.50                     | 0.99              |
| 2:B:359:SER:HA   | 2:B:523:THR:CG2  | 1.91                     | 0.99              |
| 1:A:394:ASN:HD22 | 1:A:516:GLU:CB   | 1.66                     | 0.99              |
| 3:C:391:CYS:SG   | 3:C:544:ASN:HA   | 2.03                     | 0.98              |
| 4:U:12:LYS:HG3   | 4:U:18:VAL:HG11  | 1.45                     | 0.98              |
| 4:O:12:LYS:HG3   | 4:O:18:VAL:HG11  | 1.45                     | 0.98              |
| 1:A:393:THR:HA   | 1:A:522:ALA:HA   | 1.43                     | 0.98              |
| 1:A:394:ASN:N    | 1:A:516:GLU:HA   | 1.78                     | 0.98              |

Continued on next page...

Continued from previous page...

| Atom-1           | Atom-2           | Interatomic distance (Å) | Clash overlap (Å) |
|------------------|------------------|--------------------------|-------------------|
| 1:A:393:THR:OG1  | 1:A:516:GLU:CA   | 2.11                     | 0.98              |
| 4:U:13:LYS:HD3   | 4:U:14:PRO:HD2   | 1.46                     | 0.98              |
| 2:B:391:CYS:SG   | 2:B:544:ASN:O    | 2.22                     | 0.97              |
| 4:P:12:LYS:HG3   | 4:P:18:VAL:HG11  | 1.45                     | 0.97              |
| 4:O:13:LYS:HD3   | 4:O:14:PRO:HD2   | 1.46                     | 0.96              |
| 2:B:359:SER:CA   | 2:B:523:THR:CG2  | 2.42                     | 0.96              |
| 4:P:13:LYS:HD3   | 4:P:14:PRO:HD2   | 1.46                     | 0.96              |
| 3:C:360:ASN:H    | 3:C:523:THR:HB   | 1.30                     | 0.95              |
| 1:A:362:VAL:HG11 | 1:A:527:PRO:HA   | 1.49                     | 0.95              |
| 1:A:394:ASN:H    | 1:A:516:GLU:CA   | 1.75                     | 0.94              |
| 2:B:396:TYR:HE2  | 3:C:200:TYR:HH   | 0.96                     | 0.94              |
| 2:B:393:THR:CB   | 2:B:520:ALA:O    | 2.15                     | 0.94              |
| 1:A:357:ARG:NH1  | 2:B:167:THR:O    | 2.02                     | 0.93              |
| 1:A:393:THR:CB   | 1:A:516:GLU:CB   | 2.46                     | 0.93              |
| 1:A:393:THR:OG1  | 1:A:516:GLU:CG   | 2.16                     | 0.92              |
| 2:B:382:VAL:CG1  | 3:C:983:ARG:CD   | 2.46                     | 0.92              |
| 2:B:382:VAL:C    | 3:C:984:LEU:HD21 | 1.90                     | 0.92              |
| 3:C:391:CYS:SG   | 3:C:544:ASN:CA   | 2.58                     | 0.92              |
| 1:A:357:ARG:NH1  | 2:B:167:THR:C    | 2.22                     | 0.92              |
| 2:B:383:SER:HB2  | 3:C:984:LEU:HA   | 0.93                     | 0.92              |
| 3:C:393:THR:HA   | 3:C:522:ALA:HA   | 1.49                     | 0.92              |
| 1:A:391:CYS:HA   | 1:A:525:CYS:SG   | 2.09                     | 0.92              |
| 1:A:364:ASP:OD1  | 1:A:527:PRO:HD2  | 1.69                     | 0.92              |
| 2:B:357:ARG:NE   | 3:C:230:PRO:HG2  | 1.81                     | 0.92              |
| 1:A:394:ASN:CG   | 1:A:516:GLU:CA   | 2.39                     | 0.91              |
| 3:C:364:ASP:OD2  | 3:C:527:PRO:HD3  | 1.71                     | 0.91              |
| 3:C:393:THR:HG21 | 3:C:520:ALA:O    | 1.71                     | 0.90              |
| 2:B:396:TYR:HE2  | 3:C:200:TYR:OH   | 1.53                     | 0.90              |
| 1:A:883:THR:HG23 | 3:C:707:TYR:HB2  | 1.54                     | 0.89              |
| 1:A:394:ASN:N    | 1:A:516:GLU:CG   | 2.30                     | 0.89              |
| 2:B:396:TYR:CE2  | 3:C:200:TYR:OH   | 2.23                     | 0.89              |
| 1:A:395:VAL:HG21 | 1:A:524:VAL:HG22 | 1.55                     | 0.89              |
| 3:C:650:LEU:HD21 | 3:C:653:ALA:HB3  | 1.55                     | 0.89              |
| 2:B:355:ARG:NH2  | 3:C:230:PRO:O    | 2.04                     | 0.89              |
| 1:A:394:ASN:OD1  | 1:A:516:GLU:CA   | 2.22                     | 0.88              |
| 2:B:396:TYR:OH   | 3:C:200:TYR:HE1  | 1.55                     | 0.88              |
| 1:A:357:ARG:CZ   | 2:B:167:THR:HA   | 2.03                     | 0.87              |
| 1:A:395:VAL:CG2  | 1:A:524:VAL:CG2  | 2.51                     | 0.87              |
| 3:C:360:ASN:H    | 3:C:523:THR:CB   | 1.87                     | 0.87              |
| 2:B:396:TYR:OH   | 3:C:200:TYR:CE1  | 2.27                     | 0.86              |
| 4:U:4:LEU:HD13   | 4:U:109:TRP:HE1  | 1.40                     | 0.86              |

Continued on next page...

Continued from previous page...

| Atom-1           | Atom-2           | Interatomic distance (Å) | Clash overlap (Å) |
|------------------|------------------|--------------------------|-------------------|
| 1:A:200:TYR:CE2  | 3:C:396:TYR:OH   | 2.28                     | 0.86              |
| 3:C:193:VAL:HG23 | 3:C:223:LEU:HD12 | 1.56                     | 0.86              |
| 2:B:386:LYS:CD   | 3:C:983:ARG:C    | 2.42                     | 0.85              |
| 1:A:357:ARG:HH12 | 2:B:167:THR:C    | 1.79                     | 0.85              |
| 4:O:4:LEU:HD13   | 4:O:109:TRP:HE1  | 1.40                     | 0.85              |
| 2:B:382:VAL:HG13 | 3:C:983:ARG:HD3  | 1.58                     | 0.84              |
| 3:C:391:CYS:CB   | 3:C:544:ASN:O    | 2.22                     | 0.84              |
| 4:P:4:LEU:HD13   | 4:P:109:TRP:HE1  | 1.40                     | 0.84              |
| 1:A:394:ASN:N    | 1:A:516:GLU:CA   | 2.37                     | 0.84              |
| 2:B:334:ASN:HD22 | 2:B:361:CYS:CA   | 1.91                     | 0.83              |
| 2:B:361:CYS:O    | 2:B:524:VAL:CA   | 2.26                     | 0.83              |
| 1:A:357:ARG:NH1  | 2:B:167:THR:CB   | 2.31                     | 0.83              |
| 3:C:360:ASN:N    | 3:C:523:THR:HB   | 1.93                     | 0.82              |
| 1:A:362:VAL:HG11 | 1:A:527:PRO:CA   | 2.06                     | 0.81              |
| 3:C:363:ALA:CB   | 3:C:524:VAL:HG13 | 1.82                     | 0.81              |
| 3:C:393:THR:HB   | 3:C:520:ALA:O    | 1.80                     | 0.80              |
| 2:B:336:CYS:SG   | 2:B:524:VAL:CB   | 2.70                     | 0.80              |
| 1:A:395:VAL:CG2  | 1:A:524:VAL:HG21 | 2.12                     | 0.80              |
| 2:B:383:SER:HB3  | 3:C:983:ARG:C    | 2.02                     | 0.80              |
| 2:B:383:SER:CA   | 3:C:984:LEU:HD23 | 2.12                     | 0.80              |
| 1:A:395:VAL:HG21 | 1:A:524:VAL:HG21 | 1.64                     | 0.79              |
| 1:A:393:THR:H    | 1:A:516:GLU:CD   | 1.85                     | 0.79              |
| 1:A:357:ARG:NH1  | 2:B:167:THR:OG1  | 2.16                     | 0.79              |
| 1:A:364:ASP:OD1  | 1:A:527:PRO:CD   | 2.31                     | 0.79              |
| 2:B:363:ALA:H    | 2:B:525:CYS:N    | 1.80                     | 0.79              |
| 2:B:383:SER:N    | 3:C:984:LEU:HD23 | 1.98                     | 0.78              |
| 3:C:393:THR:CB   | 3:C:520:ALA:O    | 2.30                     | 0.78              |
| 2:B:383:SER:N    | 3:C:984:LEU:CD2  | 2.46                     | 0.78              |
| 2:B:355:ARG:HH21 | 3:C:230:PRO:HB2  | 1.47                     | 0.78              |
| 2:B:391:CYS:CB   | 2:B:544:ASN:HB2  | 2.13                     | 0.78              |
| 3:C:391:CYS:HB3  | 3:C:522:ALA:CB   | 2.14                     | 0.77              |
| 2:B:359:SER:HA   | 2:B:523:THR:HG23 | 1.65                     | 0.77              |
| 2:B:359:SER:CB   | 2:B:523:THR:HG21 | 2.14                     | 0.77              |
| 2:B:361:CYS:O    | 2:B:523:THR:O    | 2.03                     | 0.77              |
| 1:A:394:ASN:N    | 1:A:516:GLU:CB   | 2.48                     | 0.76              |
| 3:C:388:ASN:O    | 3:C:526:GLY:HA3  | 1.85                     | 0.76              |
| 2:B:336:CYS:SG   | 2:B:524:VAL:HB   | 2.25                     | 0.76              |
| 3:C:391:CYS:SG   | 3:C:544:ASN:C    | 2.64                     | 0.76              |
| 2:B:363:ALA:O    | 2:B:526:GLY:CA   | 2.33                     | 0.76              |
| 2:B:386:LYS:HD2  | 3:C:983:ARG:O    | 1.84                     | 0.76              |
| 2:B:383:SER:CB   | 3:C:984:LEU:CD2  | 2.57                     | 0.75              |

Continued on next page...



Continued from previous page...

| Atom-1            | Atom-2           | Interatomic distance (Å) | Clash overlap (Å) |
|-------------------|------------------|--------------------------|-------------------|
| 2:B:383:SER:CA    | 3:C:984:LEU:CD2  | 2.65                     | 0.75              |
| 1:A:362:VAL:CG1   | 1:A:527:PRO:CB   | 2.64                     | 0.75              |
| 3:C:108:THR:OG1   | 3:C:234:ASN:O    | 2.03                     | 0.75              |
| 2:B:383:SER:CB    | 3:C:984:LEU:CA   | 2.56                     | 0.74              |
| 1:A:362:VAL:HG11  | 1:A:527:PRO:CB   | 2.16                     | 0.74              |
| 4:U:51:ILE:HD12   | 4:U:72:LEU:HB2   | 1.70                     | 0.74              |
| 3:C:391:CYS:HB3   | 3:C:522:ALA:HB1  | 1.70                     | 0.73              |
| 1:A:516:GLU:CD    | 1:A:516:GLU:N    | 2.42                     | 0.73              |
| 1:A:983:ARG:O     | 3:C:383:SER:HB3  | 1.88                     | 0.73              |
| 2:B:386:LYS:HD2   | 3:C:983:ARG:CA   | 2.19                     | 0.73              |
| 3:C:361:CYS:O     | 3:C:524:VAL:HA   | 1.89                     | 0.72              |
| 2:B:386:LYS:HD2   | 3:C:984:LEU:N    | 2.01                     | 0.72              |
| 3:C:1106:GLN:HE21 | 3:C:1109:PHE:HB3 | 1.54                     | 0.72              |
| 3:C:363:ALA:CB    | 3:C:524:VAL:HG11 | 1.91                     | 0.72              |
| 4:O:51:ILE:HD12   | 4:O:72:LEU:HB2   | 1.70                     | 0.72              |
| 2:B:701:VAL:HG13  | 3:C:787:GLN:HG2  | 1.70                     | 0.72              |
| 2:B:393:THR:CG2   | 2:B:520:ALA:O    | 2.36                     | 0.72              |
| 2:B:393:THR:HA    | 2:B:522:ALA:HA   | 1.71                     | 0.72              |
| 3:C:335:LEU:HG    | 3:C:362:VAL:O    | 1.89                     | 0.72              |
| 1:A:391:CYS:CA    | 1:A:525:CYS:SG   | 2.79                     | 0.71              |
| 4:P:51:ILE:HD12   | 4:P:72:LEU:HB2   | 1.70                     | 0.71              |
| 1:A:394:ASN:O     | 1:A:516:GLU:N    | 2.23                     | 0.71              |
| 2:B:395:VAL:HG21  | 2:B:524:VAL:HG11 | 1.73                     | 0.71              |
| 1:A:364:ASP:CG    | 1:A:527:PRO:CG   | 2.59                     | 0.70              |
| 1:A:394:ASN:N     | 1:A:516:GLU:HG2  | 1.96                     | 0.70              |
| 1:A:362:VAL:HG11  | 1:A:527:PRO:HB3  | 1.73                     | 0.70              |
| 2:B:364:ASP:OD2   | 2:B:527:PRO:HG3  | 1.92                     | 0.69              |
| 1:A:362:VAL:CG1   | 1:A:527:PRO:HB3  | 2.21                     | 0.69              |
| 4:P:4:LEU:HB2     | 4:P:109:TRP:CD1  | 2.27                     | 0.69              |
| 1:A:395:VAL:N     | 1:A:524:VAL:HG11 | 2.07                     | 0.69              |
| 8:A:1302:NAG:H83  | 3:C:558:LYS:HZ1  | 1.57                     | 0.69              |
| 2:B:656:VAL:HG11  | 2:B:693:ILE:HD12 | 1.74                     | 0.69              |
| 4:U:4:LEU:HB2     | 4:U:109:TRP:CD1  | 2.27                     | 0.69              |
| 1:A:362:VAL:HG13  | 1:A:527:PRO:CA   | 2.07                     | 0.69              |
| 2:B:363:ALA:HB2   | 2:B:524:VAL:HG22 | 0.71                     | 0.69              |
| 1:A:395:VAL:CG2   | 1:A:524:VAL:HG13 | 2.12                     | 0.68              |
| 2:B:362:VAL:C     | 2:B:525:CYS:O    | 2.32                     | 0.68              |
| 4:O:4:LEU:HB2     | 4:O:109:TRP:CD1  | 2.27                     | 0.68              |
| 1:A:787:GLN:HB3   | 3:C:701:VAL:HG13 | 1.75                     | 0.68              |
| 4:U:13:LYS:HD3    | 4:U:14:PRO:CD    | 2.23                     | 0.68              |
| 1:A:46:SER:HA     | 1:A:279:TYR:O    | 1.94                     | 0.68              |

Continued on next page...

Continued from previous page...

| Atom-1           | Atom-2            | Interatomic distance (Å) | Clash overlap (Å) |
|------------------|-------------------|--------------------------|-------------------|
| 2:B:382:VAL:C    | 3:C:984:LEU:CD2   | 2.63                     | 0.68              |
| 2:B:355:ARG:NH2  | 3:C:230:PRO:HB2   | 2.08                     | 0.67              |
| 2:B:905:ARG:NH1  | 2:B:1049:LEU:O    | 2.27                     | 0.67              |
| 4:P:72:LEU:HD21  | 4:P:74:THR:HB     | 1.77                     | 0.67              |
| 2:B:37:TYR:OH    | 2:B:53:ASP:OD2    | 2.11                     | 0.67              |
| 1:A:722:VAL:HG12 | 1:A:1065:VAL:HG22 | 1.77                     | 0.66              |
| 4:U:83:ILE:HG23  | 4:U:86:LEU:HD11   | 1.77                     | 0.66              |
| 4:U:72:LEU:HD21  | 4:U:74:THR:HB     | 1.77                     | 0.66              |
| 1:A:363:ALA:HB3  | 1:A:525:CYS:C     | 2.15                     | 0.66              |
| 3:C:656:VAL:HG11 | 3:C:693:ILE:HD12  | 1.77                     | 0.66              |
| 2:B:359:SER:C    | 2:B:523:THR:HG21  | 1.87                     | 0.66              |
| 3:C:360:ASN:CA   | 3:C:523:THR:HB    | 2.24                     | 0.66              |
| 4:O:83:ILE:HG23  | 4:O:86:LEU:HD11   | 1.78                     | 0.66              |
| 4:P:13:LYS:HD3   | 4:P:14:PRO:CD     | 2.23                     | 0.66              |
| 1:A:364:ASP:CA   | 1:A:527:PRO:HD3   | 2.25                     | 0.66              |
| 4:P:83:ILE:HG23  | 4:P:86:LEU:HD11   | 1.78                     | 0.66              |
| 3:C:516:GLU:HG2  | 3:C:519:HIS:H     | 1.60                     | 0.66              |
| 2:B:176:LEU:HD23 | 2:B:190:ARG:HD2   | 1.78                     | 0.65              |
| 1:A:394:ASN:CG   | 1:A:516:GLU:CB    | 2.65                     | 0.65              |
| 2:B:404:GLY:HA2  | 2:B:508:TYR:HD2   | 1.62                     | 0.65              |
| 3:C:364:ASP:OD2  | 3:C:527:PRO:CD    | 2.43                     | 0.65              |
| 3:C:404:GLY:HA2  | 3:C:508:TYR:HD1   | 1.62                     | 0.65              |
| 4:O:13:LYS:HD3   | 4:O:14:PRO:CD     | 2.23                     | 0.65              |
| 1:A:404:GLY:HA2  | 1:A:508:TYR:HD2   | 1.62                     | 0.65              |
| 1:A:725:GLU:OE1  | 1:A:1028:LYS:NZ   | 2.28                     | 0.65              |
| 3:C:35:GLY:HA3   | 3:C:56:LEU:HB3    | 1.77                     | 0.65              |
| 4:O:72:LEU:HD21  | 4:O:74:THR:HB     | 1.77                     | 0.65              |
| 2:B:773:GLU:OE2  | 2:B:1019:ARG:NH1  | 2.30                     | 0.64              |
| 5:V:8:PRO:HG2    | 5:V:11:LEU:HB3    | 1.80                     | 0.64              |
| 3:C:905:ARG:NH1  | 3:C:1049:LEU:O    | 2.28                     | 0.64              |
| 1:A:360:ASN:N    | 1:A:523:THR:OG1   | 2.30                     | 0.64              |
| 3:C:91:TYR:OH    | 3:C:191:GLU:OE2   | 2.15                     | 0.63              |
| 2:B:330:PRO:C    | 2:B:332:ILE:H     | 2.00                     | 0.63              |
| 3:C:360:ASN:HA   | 3:C:523:THR:HB    | 1.80                     | 0.63              |
| 5:Q:8:PRO:HG2    | 5:Q:11:LEU:HB3    | 1.80                     | 0.63              |
| 2:B:382:VAL:CG1  | 3:C:983:ARG:HB2   | 2.25                     | 0.63              |
| 2:B:395:VAL:CG2  | 2:B:524:VAL:HG11  | 2.28                     | 0.63              |
| 1:A:393:THR:O    | 1:A:516:GLU:CB    | 2.47                     | 0.63              |
| 1:A:567:ARG:HD3  | 1:A:571:ASP:HA    | 1.80                     | 0.62              |
| 1:A:364:ASP:HA   | 1:A:527:PRO:HD2   | 1.82                     | 0.62              |
| 5:S:8:PRO:HG2    | 5:S:11:LEU:HB3    | 1.80                     | 0.62              |

Continued on next page...



Continued from previous page...

| Atom-1           | Atom-2           | Interatomic distance (Å) | Clash overlap (Å) |
|------------------|------------------|--------------------------|-------------------|
| 1:A:364:ASP:CG   | 1:A:527:PRO:HG3  | 2.20                     | 0.62              |
| 4:P:106:PHE:O    | 4:P:107:ASP:HB2  | 2.00                     | 0.62              |
| 2:B:393:THR:HB   | 2:B:520:ALA:C    | 2.16                     | 0.62              |
| 2:B:743:CYS:SG   | 2:B:750:SER:N    | 2.73                     | 0.62              |
| 5:Q:15:VAL:HG13  | 5:Q:80:PRO:HD2   | 1.82                     | 0.62              |
| 1:A:983:ARG:O    | 3:C:383:SER:CB   | 2.48                     | 0.61              |
| 2:B:363:ALA:CA   | 2:B:524:VAL:HG23 | 2.29                     | 0.61              |
| 1:A:64:TRP:HE1   | 1:A:264:ALA:HB1  | 1.65                     | 0.61              |
| 1:A:82:PRO:HG2   | 1:A:84:LEU:HD21  | 1.82                     | 0.61              |
| 1:A:362:VAL:HG12 | 1:A:527:PRO:CA   | 2.24                     | 0.61              |
| 5:S:15:VAL:HG13  | 5:S:80:PRO:HD2   | 1.82                     | 0.61              |
| 5:V:15:VAL:HG13  | 5:V:80:PRO:HD2   | 1.82                     | 0.61              |
| 2:B:425:LEU:HD12 | 2:B:426:PRO:HD2  | 1.83                     | 0.61              |
| 4:U:106:PHE:O    | 4:U:107:ASP:HB2  | 2.00                     | 0.61              |
| 1:A:393:THR:CA   | 1:A:516:GLU:CB   | 2.78                     | 0.61              |
| 1:A:425:LEU:HD12 | 1:A:426:PRO:HD2  | 1.83                     | 0.61              |
| 3:C:323:THR:OG1  | 3:C:324:GLU:OE2  | 2.19                     | 0.61              |
| 5:Q:36:TYR:HD1   | 5:Q:46:LEU:HA    | 1.66                     | 0.61              |
| 1:A:360:ASN:CA   | 1:A:523:THR:OG1  | 2.49                     | 0.61              |
| 1:A:364:ASP:HA   | 1:A:527:PRO:CD   | 2.31                     | 0.60              |
| 4:O:106:PHE:O    | 4:O:107:ASP:HB2  | 2.00                     | 0.60              |
| 1:A:984:LEU:HD21 | 3:C:381:GLY:O    | 2.01                     | 0.60              |
| 4:U:27:TYR:CZ    | 4:U:98:ARG:HD3   | 2.37                     | 0.60              |
| 5:V:36:TYR:HD1   | 5:V:46:LEU:HA    | 1.66                     | 0.60              |
| 1:A:905:ARG:NH1  | 1:A:1049:LEU:O   | 2.34                     | 0.60              |
| 1:A:984:LEU:HA   | 3:C:383:SER:HB2  | 1.84                     | 0.60              |
| 3:C:546:LEU:HD21 | 3:C:573:THR:HG21 | 1.81                     | 0.60              |
| 3:C:393:THR:HB   | 3:C:520:ALA:C    | 2.21                     | 0.60              |
| 1:A:393:THR:HB   | 1:A:516:GLU:CB   | 2.32                     | 0.60              |
| 1:A:701:VAL:HG13 | 2:B:787:GLN:HG2  | 1.82                     | 0.60              |
| 1:A:364:ASP:OD1  | 1:A:527:PRO:CG   | 2.49                     | 0.60              |
| 1:A:364:ASP:CG   | 1:A:527:PRO:CD   | 2.70                     | 0.60              |
| 1:A:364:ASP:CB   | 1:A:527:PRO:HD3  | 2.31                     | 0.60              |
| 1:A:393:THR:C    | 1:A:516:GLU:HB3  | 2.20                     | 0.60              |
| 1:A:401:VAL:HG22 | 1:A:509:ARG:HG2  | 1.84                     | 0.60              |
| 2:B:401:VAL:HG22 | 2:B:509:ARG:HG2  | 1.84                     | 0.60              |
| 1:A:983:ARG:HB3  | 3:C:390:LEU:HD21 | 1.82                     | 0.59              |
| 3:C:425:LEU:HD12 | 3:C:426:PRO:HD2  | 1.83                     | 0.59              |
| 5:V:33:LEU:HD13  | 5:V:71:PHE:CD2   | 2.37                     | 0.59              |
| 5:Q:33:LEU:HD13  | 5:Q:71:PHE:CD2   | 2.37                     | 0.59              |
| 4:P:27:TYR:CZ    | 4:P:98:ARG:HD3   | 2.37                     | 0.59              |

Continued on next page...

Continued from previous page...

| Atom-1           | Atom-2            | Interatomic distance (Å) | Clash overlap (Å) |
|------------------|-------------------|--------------------------|-------------------|
| 1:A:362:VAL:CG1  | 1:A:527:PRO:N     | 2.65                     | 0.59              |
| 2:B:391:CYS:HB3  | 2:B:522:ALA:CB    | 2.32                     | 0.59              |
| 5:S:33:LEU:HD13  | 5:S:71:PHE:CD1    | 2.37                     | 0.59              |
| 5:S:36:TYR:HD2   | 5:S:46:LEU:HA     | 1.66                     | 0.59              |
| 2:B:355:ARG:HH22 | 3:C:230:PRO:C     | 2.05                     | 0.59              |
| 3:C:811:LYS:HG3  | 3:C:812:PRO:HD2   | 1.85                     | 0.59              |
| 4:O:27:TYR:CZ    | 4:O:98:ARG:HD3    | 2.37                     | 0.59              |
| 1:A:395:VAL:H    | 1:A:524:VAL:HG11  | 1.66                     | 0.59              |
| 1:A:789:TYR:HA   | 3:C:703:ASN:O     | 2.02                     | 0.59              |
| 3:C:985:ASP:OD1  | 3:C:985:ASP:N     | 2.30                     | 0.59              |
| 2:B:359:SER:HB3  | 2:B:523:THR:HG21  | 1.84                     | 0.59              |
| 3:C:821:LEU:O    | 3:C:825:LYS:HG2   | 2.03                     | 0.59              |
| 3:C:280:ASN:HD21 | 8:C:1301:NAG:H82  | 1.68                     | 0.58              |
| 3:C:743:CYS:SG   | 3:C:750:SER:N     | 2.76                     | 0.58              |
| 2:B:383:SER:HB2  | 3:C:984:LEU:HD22  | 1.82                     | 0.58              |
| 2:B:390:LEU:HD21 | 3:C:983:ARG:HB3   | 1.86                     | 0.58              |
| 1:A:393:THR:O    | 1:A:516:GLU:HB3   | 2.03                     | 0.58              |
| 3:C:401:VAL:HG22 | 3:C:509:ARG:HG2   | 1.84                     | 0.58              |
| 4:U:97:ALA:HB2   | 4:U:108:VAL:HG23  | 1.86                     | 0.58              |
| 4:O:105:TYR:HB3  | 5:Q:34:HIS:CE1    | 2.39                     | 0.58              |
| 7:K:1:NAG:H83    | 7:K:1:NAG:H3      | 1.85                     | 0.58              |
| 3:C:273:ARG:HD3  | 3:C:292:ALA:HB3   | 1.86                     | 0.58              |
| 3:C:299:THR:HG22 | 3:C:315:THR:HG21  | 1.84                     | 0.58              |
| 4:O:97:ALA:HB2   | 4:O:108:VAL:HG23  | 1.86                     | 0.58              |
| 1:A:707:TYR:HB2  | 2:B:883:THR:HG23  | 1.86                     | 0.58              |
| 4:P:105:TYR:HB3  | 5:S:34:HIS:CE1    | 2.39                     | 0.58              |
| 1:A:555:SER:HB3  | 1:A:586:ASP:HB2   | 1.85                     | 0.58              |
| 2:B:362:VAL:CG1  | 2:B:525:CYS:O     | 2.52                     | 0.58              |
| 1:A:703:ASN:O    | 2:B:789:TYR:HA    | 2.04                     | 0.58              |
| 3:C:36:VAL:HG11  | 3:C:220:PHE:CZ    | 2.39                     | 0.58              |
| 5:V:6:GLN:NE2    | 5:V:88:CYS:SG     | 2.77                     | 0.58              |
| 4:O:51:ILE:HG21  | 4:O:70:PHE:HB2    | 1.86                     | 0.58              |
| 4:P:58:PRO:HB2   | 4:P:60:TYR:CZ     | 2.39                     | 0.58              |
| 1:A:763:LEU:HD22 | 1:A:1008:VAL:HG21 | 1.86                     | 0.57              |
| 5:Q:46:LEU:HD21  | 5:Q:49:TYR:HB3    | 1.86                     | 0.57              |
| 5:S:46:LEU:HD21  | 5:S:49:TYR:HB3    | 1.86                     | 0.57              |
| 1:A:883:THR:HG23 | 3:C:707:TYR:CB    | 2.32                     | 0.57              |
| 2:B:746:SER:HB2  | 2:B:749:CYS:SG    | 2.44                     | 0.57              |
| 4:P:51:ILE:HG21  | 4:P:70:PHE:HB2    | 1.86                     | 0.57              |
| 2:B:722:VAL:HG22 | 2:B:930:ALA:HB1   | 1.86                     | 0.57              |
| 1:A:393:THR:O    | 1:A:523:THR:HG22  | 2.03                     | 0.57              |

Continued on next page...

Continued from previous page...

| Atom-1            | Atom-2            | Interatomic distance (Å) | Clash overlap (Å) |
|-------------------|-------------------|--------------------------|-------------------|
| 4:U:34:MET:HG2    | 4:U:79:ALA:HB1    | 1.86                     | 0.57              |
| 4:O:58:PRO:HB2    | 4:O:60:TYR:CZ     | 2.39                     | 0.57              |
| 5:S:6:GLN:NE2     | 5:S:88:CYS:SG     | 2.77                     | 0.57              |
| 1:A:364:ASP:CB    | 1:A:527:PRO:CD    | 2.82                     | 0.57              |
| 4:U:105:TYR:HB3   | 5:V:34:HIS:CE1    | 2.39                     | 0.57              |
| 5:Q:6:GLN:NE2     | 5:Q:88:CYS:SG     | 2.77                     | 0.57              |
| 7:K:2:NAG:H3      | 7:K:2:NAG:H83     | 1.87                     | 0.57              |
| 5:V:46:LEU:HD21   | 5:V:49:TYR:HB3    | 1.86                     | 0.57              |
| 1:A:702:GLU:HA    | 2:B:788:ILE:HB    | 1.87                     | 0.57              |
| 2:B:363:ALA:CB    | 2:B:524:VAL:HG23  | 1.93                     | 0.57              |
| 2:B:1106:GLN:HE21 | 2:B:1109:PHE:HB3  | 1.70                     | 0.57              |
| 4:U:51:ILE:HG21   | 4:U:70:PHE:HB2    | 1.86                     | 0.57              |
| 4:U:58:PRO:HB2    | 4:U:60:TYR:CZ     | 2.39                     | 0.57              |
| 1:A:91:TYR:OH     | 1:A:191:GLU:OE1   | 2.17                     | 0.56              |
| 2:B:294:ASP:OD2   | 2:B:294:ASP:N     | 2.38                     | 0.56              |
| 1:A:394:ASN:H     | 1:A:516:GLU:H     | 1.51                     | 0.56              |
| 4:O:34:MET:HG2    | 4:O:79:ALA:HB1    | 1.86                     | 0.56              |
| 4:P:97:ALA:HB2    | 4:P:108:VAL:HG23  | 1.86                     | 0.56              |
| 2:B:382:VAL:HG12  | 3:C:983:ARG:CB    | 2.29                     | 0.56              |
| 2:B:170:TYR:CE1   | 2:B:172:SER:HB2   | 2.41                     | 0.56              |
| 2:B:382:VAL:HA    | 3:C:983:ARG:HD2   | 1.87                     | 0.56              |
| 2:B:386:LYS:HD3   | 3:C:982:SER:C     | 2.26                     | 0.56              |
| 4:P:34:MET:HG2    | 4:P:79:ALA:HB1    | 1.86                     | 0.56              |
| 8:A:1306:NAG:H3   | 8:A:1306:NAG:H83  | 1.87                     | 0.56              |
| 2:B:386:LYS:CD    | 3:C:983:ARG:CA    | 2.83                     | 0.56              |
| 5:S:34:HIS:HE1    | 5:S:50:TYR:CD2    | 2.24                     | 0.56              |
| 1:A:362:VAL:HG12  | 1:A:527:PRO:N     | 2.21                     | 0.56              |
| 4:O:12:LYS:HG3    | 4:O:18:VAL:CG1    | 2.30                     | 0.56              |
| 5:Q:33:LEU:HA     | 5:Q:89:GLN:O      | 2.06                     | 0.56              |
| 2:B:330:PRO:C     | 2:B:332:ILE:N     | 2.59                     | 0.55              |
| 5:S:38:GLN:HG3    | 5:S:44:PRO:HD3    | 1.88                     | 0.55              |
| 3:C:472:ILE:HD11  | 3:C:488:CYS:HB3   | 1.88                     | 0.55              |
| 3:C:738:CYS:SG    | 3:C:739:THR:N     | 2.80                     | 0.55              |
| 5:V:38:GLN:HG3    | 5:V:44:PRO:HD3    | 1.88                     | 0.55              |
| 5:S:33:LEU:HA     | 5:S:89:GLN:O      | 2.06                     | 0.55              |
| 1:A:379:CYS:HA    | 1:A:432:CYS:HA    | 1.89                     | 0.55              |
| 1:A:395:VAL:CB    | 1:A:524:VAL:HG11  | 2.37                     | 0.55              |
| 1:A:1141:LEU:HG   | 1:A:1145:LEU:HD13 | 1.88                     | 0.55              |
| 2:B:391:CYS:HB3   | 2:B:522:ALA:HB3   | 1.89                     | 0.55              |
| 5:Q:64:GLY:HA2    | 5:Q:73:LEU:HA     | 1.89                     | 0.55              |
| 3:C:822:LEU:HD21  | 3:C:938:LEU:HD13  | 1.89                     | 0.55              |

Continued on next page...

Continued from previous page...

| Atom-1           | Atom-2           | Interatomic distance (Å) | Clash overlap (Å) |
|------------------|------------------|--------------------------|-------------------|
| 5:V:64:GLY:HA2   | 5:V:73:LEU:HA    | 1.89                     | 0.55              |
| 1:A:560:LEU:H    | 1:A:563:GLN:NE2  | 2.05                     | 0.55              |
| 2:B:359:SER:CA   | 2:B:523:THR:HG23 | 2.25                     | 0.55              |
| 3:C:379:CYS:HA   | 3:C:432:CYS:HA   | 1.89                     | 0.55              |
| 5:V:33:LEU:HA    | 5:V:89:GLN:O     | 2.06                     | 0.55              |
| 5:V:34:HIS:HE1   | 5:V:50:TYR:CD1   | 2.24                     | 0.55              |
| 1:A:516:GLU:CD   | 1:A:516:GLU:C    | 2.65                     | 0.55              |
| 2:B:170:TYR:HE1  | 2:B:172:SER:HB2  | 1.72                     | 0.55              |
| 2:B:821:LEU:HD21 | 2:B:939:SER:HB2  | 1.87                     | 0.55              |
| 4:O:107:ASP:HB3  | 4:O:109:TRP:CZ3  | 2.42                     | 0.55              |
| 5:Q:38:GLN:HG3   | 5:Q:44:PRO:HD3   | 1.88                     | 0.55              |
| 4:P:107:ASP:HB3  | 4:P:109:TRP:CZ3  | 2.42                     | 0.55              |
| 3:C:364:ASP:OD2  | 3:C:527:PRO:HG3  | 2.06                     | 0.55              |
| 4:O:98:ARG:NH2   | 4:O:109:TRP:HH2  | 2.05                     | 0.55              |
| 2:B:706:ALA:HB1  | 7:M:2:NAG:O7     | 2.07                     | 0.54              |
| 4:P:12:LYS:HG3   | 4:P:18:VAL:CG1   | 2.30                     | 0.54              |
| 3:C:391:CYS:O    | 3:C:522:ALA:HB2  | 2.06                     | 0.54              |
| 4:P:98:ARG:NH2   | 4:P:109:TRP:HH2  | 2.05                     | 0.54              |
| 1:A:364:ASP:CA   | 1:A:527:PRO:CD   | 2.86                     | 0.54              |
| 4:U:98:ARG:NH2   | 4:U:109:TRP:HH2  | 2.05                     | 0.54              |
| 5:Q:34:HIS:HE1   | 5:Q:50:TYR:CD1   | 2.24                     | 0.54              |
| 5:S:6:GLN:HE22   | 5:S:88:CYS:H     | 1.56                     | 0.54              |
| 2:B:472:ILE:HD11 | 2:B:488:CYS:HB3  | 1.88                     | 0.54              |
| 4:U:33:GLY:H     | 4:U:100:GLY:HA2  | 1.73                     | 0.54              |
| 4:O:33:GLY:H     | 4:O:100:GLY:HA2  | 1.73                     | 0.54              |
| 2:B:390:LEU:HD11 | 3:C:983:ARG:HB3  | 1.89                     | 0.54              |
| 1:A:393:THR:CA   | 1:A:522:ALA:HA   | 2.30                     | 0.54              |
| 4:P:33:GLY:H     | 4:P:100:GLY:HA2  | 1.73                     | 0.54              |
| 4:U:107:ASP:HB3  | 4:U:109:TRP:CZ3  | 2.42                     | 0.54              |
| 1:A:200:TYR:HE2  | 3:C:396:TYR:OH   | 1.88                     | 0.53              |
| 2:B:604:THR:HG21 | 2:B:687:VAL:HG11 | 1.89                     | 0.53              |
| 2:B:707:TYR:HB2  | 3:C:883:THR:HG23 | 1.90                     | 0.53              |
| 3:C:662:CYS:HB2  | 3:C:697:MET:HG2  | 1.90                     | 0.53              |
| 2:B:127:VAL:HG21 | 8:B:1301:NAG:H5  | 1.90                     | 0.53              |
| 2:B:1039:ARG:NE  | 3:C:1031:GLU:OE1 | 2.41                     | 0.53              |
| 3:C:52:GLN:OE1   | 3:C:52:GLN:N     | 2.39                     | 0.53              |
| 2:B:134:GLN:HG2  | 2:B:162:SER:HB3  | 1.90                     | 0.53              |
| 2:B:276:LEU:O    | 2:B:288:ALA:HA   | 2.08                     | 0.53              |
| 2:B:379:CYS:HA   | 2:B:432:CYS:HA   | 1.89                     | 0.53              |
| 5:S:64:GLY:HA2   | 5:S:73:LEU:HA    | 1.89                     | 0.53              |
| 5:Q:34:HIS:HE1   | 5:Q:50:TYR:CE1   | 2.27                     | 0.53              |

Continued on next page...

Continued from previous page...

| Atom-1           | Atom-2           | Interatomic distance (Å) | Clash overlap (Å) |
|------------------|------------------|--------------------------|-------------------|
| 3:C:472:ILE:HD13 | 3:C:484:LYS:HG3  | 1.91                     | 0.53              |
| 1:A:105:ILE:HD12 | 1:A:239:GLN:HE21 | 1.73                     | 0.53              |
| 1:A:121:ASN:HD21 | 1:A:174:PRO:HB3  | 1.73                     | 0.53              |
| 1:A:228:ASP:OD2  | 1:A:228:ASP:N    | 2.42                     | 0.53              |
| 1:A:472:ILE:HD11 | 1:A:488:CYS:HB3  | 1.88                     | 0.53              |
| 2:B:303:LEU:HD12 | 2:B:308:VAL:HG12 | 1.90                     | 0.53              |
| 7:G:2:NAG:H83    | 7:G:2:NAG:H3     | 1.89                     | 0.53              |
| 3:C:336:CYS:SG   | 3:C:524:VAL:HG22 | 2.49                     | 0.53              |
| 3:C:870:ILE:O    | 3:C:874:THR:HG23 | 2.09                     | 0.53              |
| 1:A:1139:ASP:OD1 | 1:A:1139:ASP:N   | 2.39                     | 0.52              |
| 3:C:565:PHE:HB3  | 3:C:576:VAL:HG23 | 1.91                     | 0.52              |
| 4:P:45:LEU:HD11  | 5:S:44:PRO:HG2   | 1.92                     | 0.52              |
| 3:C:193:VAL:HB   | 3:C:204:TYR:HB2  | 1.92                     | 0.52              |
| 3:C:364:ASP:OD2  | 3:C:527:PRO:CG   | 2.58                     | 0.52              |
| 1:A:328:ARG:HD3  | 1:A:578:ASP:OD1  | 2.09                     | 0.52              |
| 2:B:309:GLU:HG2  | 2:B:313:TYR:OH   | 2.10                     | 0.52              |
| 2:B:400:PHE:HE2  | 2:B:410:ILE:HD12 | 1.75                     | 0.52              |
| 3:C:295:PRO:O    | 3:C:299:THR:HG23 | 2.09                     | 0.52              |
| 5:Q:6:GLN:HE22   | 5:Q:88:CYS:H     | 1.56                     | 0.52              |
| 5:S:34:HIS:HE1   | 5:S:50:TYR:CE2   | 2.27                     | 0.52              |
| 3:C:388:ASN:O    | 3:C:526:GLY:CA   | 2.57                     | 0.52              |
| 4:P:93:VAL:HG12  | 4:P:114:LEU:HD23 | 1.91                     | 0.52              |
| 1:A:362:VAL:HG12 | 1:A:527:PRO:CB   | 2.39                     | 0.52              |
| 1:A:395:VAL:CB   | 1:A:524:VAL:HG21 | 2.39                     | 0.52              |
| 1:A:472:ILE:HD13 | 1:A:484:LYS:HG3  | 1.91                     | 0.52              |
| 2:B:567:ARG:HH21 | 2:B:571:ASP:HA   | 1.74                     | 0.52              |
| 5:V:6:GLN:HE22   | 5:V:88:CYS:H     | 1.56                     | 0.52              |
| 1:A:973:ILE:HG23 | 1:A:992:GLN:OE1  | 2.10                     | 0.52              |
| 2:B:391:CYS:O    | 2:B:522:ALA:HB2  | 2.10                     | 0.52              |
| 3:C:532:ASN:OD1  | 3:C:533:LEU:N    | 2.42                     | 0.52              |
| 4:U:93:VAL:HG12  | 4:U:114:LEU:HD23 | 1.91                     | 0.52              |
| 2:B:334:ASN:ND2  | 2:B:360:ASN:O    | 2.43                     | 0.51              |
| 3:C:856:ASN:ND2  | 3:C:856:ASN:O    | 2.43                     | 0.51              |
| 5:V:34:HIS:HE1   | 5:V:50:TYR:CE1   | 2.27                     | 0.51              |
| 1:A:393:THR:HB   | 1:A:516:GLU:HB2  | 1.91                     | 0.51              |
| 3:C:560:LEU:N    | 3:C:563:GLN:OE1  | 2.43                     | 0.51              |
| 4:U:50:TRP:CD2   | 4:U:104:TRP:HH2  | 2.28                     | 0.51              |
| 1:A:393:THR:CB   | 1:A:516:GLU:HB2  | 2.37                     | 0.51              |
| 2:B:472:ILE:HD13 | 2:B:484:LYS:HG3  | 1.91                     | 0.51              |
| 4:U:37:VAL:CG2   | 4:U:95:TYR:HB2   | 2.40                     | 0.51              |
| 4:O:48:MET:HG2   | 4:O:64:PHE:CD1   | 2.46                     | 0.51              |

Continued on next page...



Continued from previous page...

| Atom-1           | Atom-2           | Interatomic distance (Å) | Clash overlap (Å) |
|------------------|------------------|--------------------------|-------------------|
| 2:B:564:GLN:HG3  | 2:B:565:PHE:N    | 2.26                     | 0.51              |
| 4:O:45:LEU:HD11  | 5:Q:44:PRO:HG2   | 1.92                     | 0.51              |
| 4:O:93:VAL:HG12  | 4:O:114:LEU:HD23 | 1.91                     | 0.51              |
| 4:P:48:MET:HG2   | 4:P:64:PHE:CD1   | 2.46                     | 0.51              |
| 4:P:50:TRP:CD2   | 4:P:104:TRP:HH2  | 2.28                     | 0.51              |
| 1:A:983:ARG:HD2  | 3:C:382:VAL:HG13 | 1.92                     | 0.51              |
| 3:C:746:SER:HB3  | 3:C:749:CYS:SG   | 2.51                     | 0.51              |
| 4:U:45:LEU:HD11  | 5:V:44:PRO:HG2   | 1.92                     | 0.51              |
| 4:O:37:VAL:CG2   | 4:O:95:TYR:HB2   | 2.40                     | 0.51              |
| 4:P:37:VAL:CG2   | 4:P:95:TYR:HB2   | 2.40                     | 0.51              |
| 1:A:986:PRO:O    | 1:A:990:GLU:HG3  | 2.11                     | 0.51              |
| 4:U:37:VAL:HG22  | 4:U:95:TYR:HB2   | 1.93                     | 0.51              |
| 4:O:50:TRP:CD2   | 4:O:104:TRP:HH2  | 2.28                     | 0.51              |
| 2:B:316:SER:OG   | 2:B:317:ASN:N    | 2.43                     | 0.51              |
| 2:B:390:LEU:HD22 | 3:C:983:ARG:HD3  | 1.92                     | 0.51              |
| 3:C:189:LEU:HD23 | 3:C:208:THR:O    | 2.11                     | 0.51              |
| 1:A:217:PRO:C    | 1:A:219:GLY:H    | 2.14                     | 0.51              |
| 1:A:787:GLN:OE1  | 3:C:703:ASN:HB2  | 2.11                     | 0.51              |
| 3:C:400:PHE:HE2  | 3:C:410:ILE:HD12 | 1.75                     | 0.51              |
| 4:P:35:ASN:OD1   | 4:P:47:TRP:NE1   | 2.43                     | 0.51              |
| 5:Q:84:ALA:HB3   | 5:Q:86:TYR:CE1   | 2.46                     | 0.51              |
| 1:A:400:PHE:HE2  | 1:A:410:ILE:HD12 | 1.75                     | 0.51              |
| 1:A:722:VAL:HG22 | 1:A:930:ALA:HB1  | 1.91                     | 0.51              |
| 2:B:395:VAL:HG21 | 2:B:524:VAL:CG1  | 2.41                     | 0.51              |
| 4:U:48:MET:HG2   | 4:U:64:PHE:CD1   | 2.46                     | 0.51              |
| 2:B:200:TYR:HE1  | 2:B:230:PRO:HB3  | 1.77                     | 0.50              |
| 2:B:715:PRO:HA   | 2:B:1072:GLU:HA  | 1.93                     | 0.50              |
| 3:C:298:GLU:OE2  | 3:C:316:SER:OG   | 2.29                     | 0.50              |
| 4:O:35:ASN:OD1   | 4:O:47:TRP:NE1   | 2.43                     | 0.50              |
| 3:C:200:TYR:CE1  | 3:C:230:PRO:HB3  | 2.46                     | 0.50              |
| 5:V:2:ILE:HD13   | 5:V:27:GLN:HB2   | 1.93                     | 0.50              |
| 4:O:37:VAL:HG22  | 4:O:95:TYR:HB2   | 1.93                     | 0.50              |
| 5:Q:2:ILE:HD13   | 5:Q:27:GLN:HB2   | 1.94                     | 0.50              |
| 1:A:132:GLU:HG2  | 1:A:165:ASN:HB2  | 1.94                     | 0.50              |
| 1:A:362:VAL:HG12 | 1:A:527:PRO:HB3  | 1.94                     | 0.50              |
| 8:A:1302:NAG:H83 | 3:C:558:LYS:NZ   | 2.26                     | 0.50              |
| 3:C:34:ARG:NH1   | 3:C:191:GLU:OE1  | 2.44                     | 0.50              |
| 4:U:35:ASN:OD1   | 4:U:47:TRP:NE1   | 2.43                     | 0.50              |
| 5:V:84:ALA:HB3   | 5:V:86:TYR:CE1   | 2.46                     | 0.50              |
| 3:C:391:CYS:SG   | 3:C:544:ASN:CB   | 3.00                     | 0.50              |
| 4:P:37:VAL:HG22  | 4:P:95:TYR:HB2   | 1.93                     | 0.50              |

Continued on next page...

Continued from previous page...

| Atom-1           | Atom-2           | Interatomic distance (Å) | Clash overlap (Å) |
|------------------|------------------|--------------------------|-------------------|
| 2:B:362:VAL:HA   | 2:B:525:CYS:H    | 1.76                     | 0.50              |
| 3:C:105:ILE:HG12 | 3:C:241:LEU:HD21 | 1.93                     | 0.50              |
| 3:C:470:THR:HG22 | 3:C:492:LEU:HD12 | 1.94                     | 0.50              |
| 4:O:38:ARG:HD3   | 4:O:64:PHE:CE2   | 2.47                     | 0.50              |
| 5:S:2:ILE:HD13   | 5:S:27:GLN:HB2   | 1.93                     | 0.50              |
| 3:C:330:PRO:C    | 3:C:332:ILE:N    | 2.61                     | 0.50              |
| 5:Q:36:TYR:CD1   | 5:Q:46:LEU:HA    | 2.47                     | 0.50              |
| 1:A:869:MET:HG2  | 3:C:699:LEU:HD21 | 1.94                     | 0.49              |
| 1:A:359:SER:HA   | 1:A:523:THR:HG23 | 1.95                     | 0.49              |
| 1:A:391:CYS:CB   | 1:A:525:CYS:SG   | 3.00                     | 0.49              |
| 1:A:746:SER:HB3  | 1:A:749:CYS:SG   | 2.52                     | 0.49              |
| 5:V:21:ILE:O     | 5:V:72:THR:OG1   | 2.19                     | 0.49              |
| 1:A:360:ASN:HA   | 1:A:523:THR:OG1  | 2.12                     | 0.49              |
| 1:A:963:VAL:HG12 | 3:C:570:ALA:HB2  | 1.93                     | 0.49              |
| 3:C:391:CYS:SG   | 3:C:544:ASN:HB3  | 2.52                     | 0.49              |
| 4:P:38:ARG:HD3   | 4:P:64:PHE:CE2   | 2.47                     | 0.49              |
| 1:A:473:TYR:CE2  | 1:A:475:ALA:HB2  | 2.48                     | 0.49              |
| 3:C:206:LYS:HB2  | 3:C:223:LEU:HD22 | 1.93                     | 0.49              |
| 4:U:34:MET:HG2   | 4:U:79:ALA:CB    | 2.42                     | 0.49              |
| 4:U:38:ARG:HD3   | 4:U:64:PHE:CE2   | 2.47                     | 0.49              |
| 1:A:470:THR:HG22 | 1:A:492:LEU:HD12 | 1.94                     | 0.49              |
| 2:B:386:LYS:HE2  | 3:C:981:LEU:O    | 2.12                     | 0.49              |
| 2:B:390:LEU:CD2  | 3:C:983:ARG:HD3  | 2.42                     | 0.49              |
| 3:C:170:TYR:CE2  | 3:C:172:SER:HB2  | 2.48                     | 0.49              |
| 3:C:280:ASN:ND2  | 8:C:1301:NAG:H82 | 2.27                     | 0.49              |
| 3:C:429:PHE:HE1  | 3:C:514:SER:HA   | 1.77                     | 0.49              |
| 4:O:34:MET:HG2   | 4:O:79:ALA:CB    | 2.42                     | 0.49              |
| 1:A:578:ASP:OD2  | 1:A:581:THR:HG22 | 2.13                     | 0.49              |
| 1:A:858:LEU:HD23 | 1:A:959:LEU:HD22 | 1.95                     | 0.49              |
| 1:A:870:ILE:O    | 1:A:874:THR:HG23 | 2.12                     | 0.49              |
| 4:P:34:MET:HG2   | 4:P:79:ALA:CB    | 2.42                     | 0.49              |
| 5:S:84:ALA:HB3   | 5:S:86:TYR:CE2   | 2.46                     | 0.49              |
| 1:A:331:ASN:HB2  | 1:A:580:GLN:HG2  | 1.93                     | 0.49              |
| 2:B:97:LYS:HZ2   | 2:B:187:LYS:N    | 2.11                     | 0.49              |
| 3:C:391:CYS:O    | 3:C:522:ALA:CB   | 2.61                     | 0.49              |
| 3:C:472:ILE:HG21 | 3:C:482:GLY:H    | 1.78                     | 0.48              |
| 5:S:35:TRP:CD2   | 5:S:73:LEU:HD22  | 2.48                     | 0.48              |
| 2:B:473:TYR:CE2  | 2:B:475:ALA:HB2  | 2.48                     | 0.48              |
| 5:Q:35:TRP:CD2   | 5:Q:73:LEU:HD22  | 2.48                     | 0.48              |
| 2:B:470:THR:HG22 | 2:B:492:LEU:HD12 | 1.94                     | 0.48              |
| 4:O:107:ASP:HB3  | 4:O:109:TRP:CE3  | 2.49                     | 0.48              |

Continued on next page...

Continued from previous page...

| Atom-1            | Atom-2           | Interatomic distance (Å) | Clash overlap (Å) |
|-------------------|------------------|--------------------------|-------------------|
| 3:C:124:THR:HG22  | 3:C:174:PRO:HG3  | 1.95                     | 0.48              |
| 3:C:391:CYS:HB2   | 3:C:544:ASN:C    | 2.27                     | 0.48              |
| 3:C:473:TYR:CE2   | 3:C:475:ALA:HB2  | 2.48                     | 0.48              |
| 1:A:46:SER:CA     | 1:A:279:TYR:O    | 2.61                     | 0.48              |
| 1:A:472:ILE:HG21  | 1:A:482:GLY:H    | 1.78                     | 0.48              |
| 3:C:567:ARG:NH1   | 3:C:571:ASP:OD1  | 2.47                     | 0.48              |
| 1:A:976:VAL:HB    | 1:A:979:ASP:OD2  | 2.14                     | 0.48              |
| 2:B:472:ILE:HG21  | 2:B:482:GLY:H    | 1.78                     | 0.48              |
| 6:E:1:NAG:H4      | 6:E:2:NAG:H2     | 1.63                     | 0.48              |
| 2:B:359:SER:C     | 2:B:523:THR:HG23 | 2.15                     | 0.48              |
| 4:P:107:ASP:HB3   | 4:P:109:TRP:CE3  | 2.49                     | 0.48              |
| 1:A:357:ARG:NH2   | 2:B:167:THR:HA   | 2.28                     | 0.48              |
| 2:B:395:VAL:CG2   | 2:B:524:VAL:CG1  | 2.92                     | 0.48              |
| 4:U:4:LEU:HB2     | 4:U:109:TRP:HD1  | 1.76                     | 0.48              |
| 2:B:334:ASN:HD22  | 2:B:361:CYS:CB   | 2.27                     | 0.48              |
| 3:C:725:GLU:OE1   | 3:C:1028:LYS:NZ  | 2.22                     | 0.48              |
| 4:U:2:VAL:HG23    | 4:U:2:VAL:O      | 2.13                     | 0.48              |
| 5:V:35:TRP:CD2    | 5:V:73:LEU:HD22  | 2.48                     | 0.48              |
| 3:C:170:TYR:CZ    | 3:C:172:SER:HB2  | 2.49                     | 0.48              |
| 4:O:2:VAL:HG23    | 4:O:2:VAL:O      | 2.14                     | 0.48              |
| 4:P:4:LEU:HD23    | 4:P:22:CYS:SG    | 2.54                     | 0.48              |
| 1:A:395:VAL:HB    | 1:A:524:VAL:HG21 | 1.95                     | 0.47              |
| 1:A:1031:GLU:N    | 1:A:1031:GLU:OE1 | 2.47                     | 0.47              |
| 4:U:107:ASP:HB3   | 4:U:109:TRP:CE3  | 2.49                     | 0.47              |
| 1:A:1105:THR:HG22 | 1:A:1112:PRO:HA  | 1.96                     | 0.47              |
| 4:P:2:VAL:HG23    | 4:P:2:VAL:O      | 2.13                     | 0.47              |
| 3:C:200:TYR:HE1   | 3:C:230:PRO:HB3  | 1.80                     | 0.47              |
| 3:C:206:LYS:HG3   | 3:C:223:LEU:HA   | 1.95                     | 0.47              |
| 4:O:4:LEU:HD23    | 4:O:22:CYS:SG    | 2.54                     | 0.47              |
| 1:A:331:ASN:CB    | 1:A:580:GLN:HG2  | 2.45                     | 0.47              |
| 1:A:1102:TRP:HB2  | 1:A:1135:ASN:ND2 | 2.30                     | 0.47              |
| 5:V:36:TYR:CD1    | 5:V:46:LEU:HA    | 2.47                     | 0.47              |
| 1:A:200:TYR:CZ    | 3:C:396:TYR:OH   | 2.68                     | 0.47              |
| 3:C:331:ASN:O     | 3:C:332:ILE:C    | 2.52                     | 0.47              |
| 4:U:109:TRP:CD1   | 4:U:109:TRP:O    | 2.68                     | 0.47              |
| 6:D:1:NAG:H4      | 6:D:2:NAG:H2     | 1.63                     | 0.47              |
| 2:B:324:GLU:OE1   | 2:B:325:SER:N    | 2.40                     | 0.47              |
| 5:V:4:MET:HE3     | 5:V:90:GLN:HB3   | 1.97                     | 0.47              |
| 6:F:1:NAG:H4      | 6:F:2:NAG:H2     | 1.63                     | 0.47              |
| 1:A:395:VAL:HG23  | 1:A:524:VAL:CB   | 2.31                     | 0.47              |
| 2:B:386:LYS:CD    | 3:C:984:LEU:N    | 2.75                     | 0.47              |

Continued on next page...



Continued from previous page...

| Atom-1           | Atom-2            | Interatomic distance (Å) | Clash overlap (Å) |
|------------------|-------------------|--------------------------|-------------------|
| 2:B:786:LYS:HG3  | 2:B:787:GLN:HG3   | 1.97                     | 0.47              |
| 3:C:715:PRO:HA   | 3:C:1071:GLN:O    | 2.13                     | 0.47              |
| 5:V:61:ARG:NE    | 5:V:79:GLN:OE1    | 2.48                     | 0.47              |
| 4:P:4:LEU:HB2    | 4:P:109:TRP:HD1   | 1.77                     | 0.47              |
| 1:A:99:ASN:CG    | 1:A:102:ARG:HE    | 2.19                     | 0.47              |
| 5:Q:61:ARG:NE    | 5:Q:79:GLN:OE1    | 2.48                     | 0.47              |
| 1:A:394:ASN:CB   | 1:A:516:GLU:CB    | 2.93                     | 0.46              |
| 1:A:1037:SER:OG  | 1:A:1039:ARG:HG2  | 2.14                     | 0.46              |
| 2:B:452:LEU:HD22 | 2:B:494:SER:HA    | 1.98                     | 0.46              |
| 4:U:59:THR:HG23  | 4:U:59:THR:O      | 2.15                     | 0.46              |
| 5:Q:55:ILE:HG23  | 5:Q:58:VAL:HB     | 1.97                     | 0.46              |
| 1:A:611:LEU:HD22 | 1:A:666:ILE:HG23  | 1.97                     | 0.46              |
| 1:A:726:ILE:HG12 | 1:A:1061:VAL:HG22 | 1.97                     | 0.46              |
| 2:B:363:ALA:O    | 2:B:525:CYS:C     | 2.53                     | 0.46              |
| 3:C:431:GLY:HA2  | 3:C:515:PHE:CD2   | 2.50                     | 0.46              |
| 4:O:109:TRP:CD1  | 4:O:109:TRP:O     | 2.68                     | 0.46              |
| 1:A:770:ILE:O    | 1:A:774:GLN:HG2   | 2.15                     | 0.46              |
| 2:B:363:ALA:O    | 2:B:526:GLY:N     | 2.49                     | 0.46              |
| 2:B:418:ILE:HA   | 2:B:422:ASN:HB2   | 1.98                     | 0.46              |
| 4:U:37:VAL:O     | 4:U:95:TYR:N      | 2.45                     | 0.46              |
| 5:Q:4:MET:HE3    | 5:Q:90:GLN:HB3    | 1.97                     | 0.46              |
| 4:P:14:PRO:HG3   | 4:P:117:VAL:HG22  | 1.97                     | 0.46              |
| 4:U:4:LEU:HD23   | 4:U:22:CYS:SG     | 2.54                     | 0.46              |
| 4:U:67:ARG:HD2   | 4:U:84:CYS:O      | 2.15                     | 0.46              |
| 4:O:95:TYR:HE2   | 5:Q:44:PRO:HD2    | 1.81                     | 0.46              |
| 2:B:280:ASN:OD1  | 2:B:281:GLU:N     | 2.42                     | 0.46              |
| 4:O:67:ARG:HD2   | 4:O:84:CYS:O      | 2.15                     | 0.46              |
| 5:S:61:ARG:NE    | 5:S:79:GLN:OE1    | 2.48                     | 0.46              |
| 2:B:722:VAL:HA   | 2:B:1064:HIS:O    | 2.14                     | 0.46              |
| 3:C:418:ILE:HA   | 3:C:422:ASN:HB2   | 1.98                     | 0.46              |
| 1:A:282:ASN:HB2  | 1:A:284:THR:HG22  | 1.98                     | 0.46              |
| 4:U:12:LYS:HG3   | 4:U:18:VAL:CG1    | 2.30                     | 0.46              |
| 4:O:37:VAL:O     | 4:O:95:TYR:N      | 2.45                     | 0.46              |
| 4:P:67:ARG:HD2   | 4:P:84:CYS:O      | 2.15                     | 0.46              |
| 1:A:418:ILE:HA   | 1:A:422:ASN:HB2   | 1.98                     | 0.46              |
| 3:C:454:ARG:HE   | 3:C:454:ARG:HB3   | 1.59                     | 0.46              |
| 5:V:55:ILE:HG23  | 5:V:58:VAL:HB     | 1.98                     | 0.46              |
| 4:P:109:TRP:CD1  | 4:P:109:TRP:O     | 2.68                     | 0.46              |
| 5:S:55:ILE:HG23  | 5:S:58:VAL:HB     | 1.98                     | 0.46              |
| 1:A:320:VAL:HG22 | 1:A:591:SER:O     | 2.16                     | 0.46              |
| 1:A:394:ASN:ND2  | 1:A:516:GLU:CA    | 2.79                     | 0.46              |

Continued on next page...

Continued from previous page...

| Atom-1           | Atom-2            | Interatomic distance (Å) | Clash overlap (Å) |
|------------------|-------------------|--------------------------|-------------------|
| 1:A:516:GLU:CB   | 1:A:516:GLU:CA    | 2.94                     | 0.46              |
| 1:A:542:ASN:OD1  | 1:A:547:THR:HG22  | 2.16                     | 0.46              |
| 4:P:59:THR:HG23  | 4:P:59:THR:O      | 2.15                     | 0.46              |
| 2:B:53:ASP:HB3   | 2:B:55:PHE:CE1    | 2.51                     | 0.45              |
| 2:B:734:THR:HG21 | 2:B:1007:TYR:OH   | 2.16                     | 0.45              |
| 5:S:36:TYR:CD2   | 5:S:46:LEU:HA     | 2.47                     | 0.45              |
| 4:O:59:THR:HG23  | 4:O:59:THR:O      | 2.15                     | 0.45              |
| 2:B:390:LEU:HD11 | 3:C:983:ARG:CB    | 2.46                     | 0.45              |
| 4:U:20:VAL:HG12  | 4:U:113:THR:HG21  | 1.98                     | 0.45              |
| 1:A:957:GLN:HE21 | 2:B:765:ARG:NH2   | 2.14                     | 0.45              |
| 3:C:126:VAL:CG2  | 3:C:172:SER:HB3   | 2.46                     | 0.45              |
| 3:C:725:GLU:CD   | 3:C:1028:LYS:HZ3  | 2.15                     | 0.45              |
| 4:O:20:VAL:HG12  | 4:O:113:THR:HG21  | 1.98                     | 0.45              |
| 1:A:359:SER:HB3  | 1:A:523:THR:HG21  | 1.98                     | 0.45              |
| 2:B:362:VAL:CA   | 2:B:525:CYS:O     | 2.64                     | 0.45              |
| 2:B:362:VAL:HG13 | 2:B:525:CYS:O     | 2.16                     | 0.45              |
| 3:C:973:ILE:HG23 | 3:C:992:GLN:OE1   | 2.17                     | 0.45              |
| 4:U:14:PRO:HG3   | 4:U:117:VAL:HG22  | 1.97                     | 0.45              |
| 4:U:95:TYR:HE2   | 5:V:44:PRO:HD2    | 1.81                     | 0.45              |
| 1:A:458:LYS:HA   | 1:A:458:LYS:HD2   | 1.41                     | 0.45              |
| 1:A:452:LEU:HD22 | 1:A:494:SER:HA    | 1.98                     | 0.45              |
| 3:C:452:LEU:HD22 | 3:C:494:SER:HA    | 1.98                     | 0.45              |
| 1:A:707:TYR:HB2  | 2:B:883:THR:CG2   | 2.46                     | 0.45              |
| 3:C:271:GLN:OE1  | 3:C:272:PRO:HD2   | 2.17                     | 0.45              |
| 3:C:977:LEU:HD11 | 3:C:993:ILE:HG12  | 1.97                     | 0.45              |
| 4:U:51:ILE:O     | 4:U:51:ILE:HG13   | 2.17                     | 0.45              |
| 4:O:4:LEU:HD13   | 4:O:109:TRP:NE1   | 2.21                     | 0.45              |
| 4:P:20:VAL:HG12  | 4:P:113:THR:HG21  | 1.98                     | 0.45              |
| 2:B:934:ILE:HD13 | 2:B:1063:LEU:HD13 | 1.99                     | 0.45              |
| 3:C:106:PHE:HD2  | 3:C:235:ILE:HD11  | 1.82                     | 0.45              |
| 3:C:531:THR:HG22 | 3:C:532:ASN:N     | 2.32                     | 0.45              |
| 3:C:560:LEU:HB2  | 3:C:563:GLN:NE2   | 2.32                     | 0.45              |
| 5:Q:21:ILE:O     | 5:Q:72:THR:OG1    | 2.19                     | 0.45              |
| 4:P:51:ILE:HG22  | 4:P:58:PRO:HA     | 1.99                     | 0.45              |
| 3:C:332:ILE:C    | 3:C:334:ASN:H     | 2.21                     | 0.45              |
| 3:C:914:ASN:O    | 3:C:918:GLU:HG3   | 2.16                     | 0.45              |
| 4:O:14:PRO:HG3   | 4:O:117:VAL:HG22  | 1.97                     | 0.45              |
| 1:A:345:THR:HG23 | 4:U:104:TRP:HD1   | 1.82                     | 0.44              |
| 1:A:736:VAL:HG12 | 1:A:858:LEU:HG    | 1.99                     | 0.44              |
| 3:C:345:THR:HG23 | 4:P:104:TRP:HD1   | 1.83                     | 0.44              |
| 4:U:51:ILE:HG22  | 4:U:58:PRO:HA     | 1.99                     | 0.44              |

Continued on next page...

Continued from previous page...

| Atom-1           | Atom-2            | Interatomic distance (Å) | Clash overlap (Å) |
|------------------|-------------------|--------------------------|-------------------|
| 4:P:95:TYR:HE2   | 5:S:44:PRO:HD2    | 1.81                     | 0.44              |
| 2:B:357:ARG:HE   | 3:C:230:PRO:HG3   | 1.36                     | 0.44              |
| 2:B:702:GLU:O    | 2:B:703:ASN:HB3   | 2.18                     | 0.44              |
| 5:V:34:HIS:CE1   | 5:V:50:TYR:CD1    | 3.05                     | 0.44              |
| 5:Q:90:GLN:OE1   | 5:Q:92:ASN:N      | 2.44                     | 0.44              |
| 1:A:364:ASP:HB2  | 1:A:527:PRO:HD3   | 1.98                     | 0.44              |
| 2:B:363:ALA:O    | 2:B:525:CYS:O     | 2.36                     | 0.44              |
| 5:Q:24:ARG:HB2   | 5:Q:24:ARG:CZ     | 2.47                     | 0.44              |
| 5:Q:61:ARG:HD3   | 5:Q:77:SER:O      | 2.18                     | 0.44              |
| 1:A:394:ASN:O    | 1:A:515:PHE:C     | 2.56                     | 0.44              |
| 2:B:736:VAL:HG11 | 2:B:1004:LEU:HD11 | 1.99                     | 0.44              |
| 3:C:29:THR:HG22  | 3:C:62:VAL:HG23   | 2.00                     | 0.44              |
| 3:C:112:SER:HB2  | 3:C:134:GLN:HG2   | 1.99                     | 0.44              |
| 5:V:24:ARG:NH2   | 5:V:24:ARG:HB2    | 2.33                     | 0.44              |
| 5:V:61:ARG:HD3   | 5:V:77:SER:O      | 2.18                     | 0.44              |
| 5:S:4:MET:HE3    | 5:S:90:GLN:HB3    | 1.99                     | 0.44              |
| 5:S:24:ARG:HB2   | 5:S:24:ARG:CZ     | 2.48                     | 0.44              |
| 5:S:24:ARG:HB2   | 5:S:24:ARG:NH2    | 2.33                     | 0.44              |
| 3:C:434:ILE:HD11 | 3:C:513:LEU:HD12  | 2.00                     | 0.44              |
| 4:O:51:ILE:HG13  | 4:O:51:ILE:O      | 2.17                     | 0.44              |
| 1:A:811:LYS:HE2  | 1:A:811:LYS:HB2   | 1.72                     | 0.44              |
| 5:Q:79:GLN:HA    | 5:Q:80:PRO:HD2    | 1.87                     | 0.44              |
| 4:P:51:ILE:HG13  | 4:P:51:ILE:O      | 2.17                     | 0.44              |
| 2:B:434:ILE:HD11 | 2:B:513:LEU:HD12  | 2.00                     | 0.44              |
| 2:B:345:THR:HG23 | 4:O:104:TRP:HD1   | 1.83                     | 0.43              |
| 2:B:492:LEU:HA   | 2:B:492:LEU:HD23  | 1.85                     | 0.43              |
| 3:C:105:ILE:HD12 | 3:C:118:LEU:HG    | 1.99                     | 0.43              |
| 4:O:51:ILE:HG22  | 4:O:58:PRO:HA     | 1.99                     | 0.43              |
| 5:S:34:HIS:CE1   | 5:S:50:TYR:CD2    | 3.05                     | 0.43              |
| 1:A:121:ASN:HD21 | 1:A:174:PRO:CB    | 2.30                     | 0.43              |
| 1:A:296:LEU:O    | 1:A:300:LYS:HG3   | 2.18                     | 0.43              |
| 1:A:421:TYR:HB3  | 1:A:457:ARG:HB3   | 2.00                     | 0.43              |
| 1:A:492:LEU:HD23 | 1:A:492:LEU:HA    | 1.85                     | 0.43              |
| 4:O:47:TRP:HZ2   | 4:O:50:TRP:HD1    | 1.66                     | 0.43              |
| 2:B:714:ILE:HD11 | 2:B:1096:VAL:HG11 | 2.00                     | 0.43              |
| 5:Q:24:ARG:HB2   | 5:Q:24:ARG:NH2    | 2.33                     | 0.43              |
| 2:B:91:TYR:OH    | 2:B:191:GLU:OE1   | 2.19                     | 0.43              |
| 3:C:87:ASN:OD1   | 3:C:88:ASP:N      | 2.52                     | 0.43              |
| 3:C:421:TYR:HB3  | 3:C:457:ARG:HB3   | 2.00                     | 0.43              |
| 5:V:24:ARG:HB2   | 5:V:24:ARG:CZ     | 2.48                     | 0.43              |
| 4:O:38:ARG:HB3   | 4:O:48:MET:HE1    | 2.01                     | 0.43              |

Continued on next page...

Continued from previous page...

| Atom-1           | Atom-2           | Interatomic distance (Å) | Clash overlap (Å) |
|------------------|------------------|--------------------------|-------------------|
| 1:A:531:THR:HG22 | 1:A:532:ASN:N    | 2.33                     | 0.43              |
| 4:O:108:VAL:O    | 4:O:108:VAL:HG13 | 2.19                     | 0.43              |
| 4:P:47:TRP:HZ2   | 4:P:50:TRP:HD1   | 1.66                     | 0.43              |
| 4:P:108:VAL:HG13 | 4:P:108:VAL:O    | 2.19                     | 0.43              |
| 1:A:434:ILE:HD11 | 1:A:513:LEU:HD12 | 2.00                     | 0.43              |
| 3:C:441:LEU:HD13 | 3:C:441:LEU:HA   | 1.91                     | 0.43              |
| 1:A:410:ILE:H    | 1:A:410:ILE:HG12 | 1.71                     | 0.43              |
| 1:A:822:LEU:HD21 | 1:A:938:LEU:HD13 | 2.01                     | 0.43              |
| 2:B:296:LEU:O    | 2:B:299:THR:OG1  | 2.28                     | 0.43              |
| 3:C:410:ILE:H    | 3:C:410:ILE:HG12 | 1.71                     | 0.43              |
| 5:V:6:GLN:NE2    | 5:V:88:CYS:H     | 2.17                     | 0.43              |
| 2:B:421:TYR:HB3  | 2:B:457:ARG:HB3  | 2.00                     | 0.43              |
| 2:B:455:LEU:HB3  | 2:B:456:PHE:H    | 1.51                     | 0.43              |
| 3:C:391:CYS:CB   | 3:C:544:ASN:C    | 2.85                     | 0.43              |
| 5:S:61:ARG:HD3   | 5:S:77:SER:O     | 2.18                     | 0.43              |
| 1:A:299:THR:HA   | 1:A:302:THR:HG22 | 2.00                     | 0.43              |
| 1:A:707:TYR:CD1  | 2:B:883:THR:HG23 | 2.54                     | 0.43              |
| 1:A:912:THR:OG1  | 1:A:914:ASN:ND2  | 2.52                     | 0.43              |
| 3:C:276:LEU:O    | 3:C:288:ALA:HA   | 2.19                     | 0.43              |
| 4:O:4:LEU:HD11   | 4:O:27:TYR:OH    | 2.19                     | 0.43              |
| 5:Q:6:GLN:NE2    | 5:Q:88:CYS:H     | 2.17                     | 0.43              |
| 5:Q:6:GLN:OE1    | 5:Q:102:THR:HG23 | 2.19                     | 0.43              |
| 4:P:4:LEU:HD11   | 4:P:27:TYR:OH    | 2.19                     | 0.43              |
| 1:A:394:ASN:OD1  | 1:A:516:GLU:C    | 2.56                     | 0.43              |
| 2:B:914:ASN:O    | 2:B:918:GLU:HG3  | 2.18                     | 0.43              |
| 2:B:985:ASP:OD2  | 2:B:987:PRO:HD2  | 2.18                     | 0.43              |
| 3:C:57:PRO:HB3   | 3:C:273:ARG:HH21 | 1.84                     | 0.43              |
| 4:O:4:LEU:HB2    | 4:O:109:TRP:HD1  | 1.77                     | 0.43              |
| 4:O:39:GLN:HG3   | 4:O:45:LEU:HD23  | 2.01                     | 0.43              |
| 2:B:821:LEU:O    | 2:B:825:LYS:HG2  | 2.19                     | 0.42              |
| 5:S:6:GLN:OE1    | 5:S:102:THR:HG23 | 2.19                     | 0.42              |
| 5:S:84:ALA:O     | 5:S:86:TYR:HD2   | 2.02                     | 0.42              |
| 2:B:129:LYS:HG2  | 2:B:169:GLU:HG2  | 2.01                     | 0.42              |
| 2:B:201:PHE:HE2  | 2:B:203:ILE:HD11 | 1.84                     | 0.42              |
| 3:C:564:GLN:OE1  | 3:C:577:ARG:HD2  | 2.19                     | 0.42              |
| 5:S:34:HIS:CE1   | 5:S:50:TYR:HD2   | 2.38                     | 0.42              |
| 1:A:199:GLY:HA2  | 1:A:232:GLY:HA2  | 2.01                     | 0.42              |
| 1:A:320:VAL:HG23 | 1:A:590:CYS:HB3  | 2.01                     | 0.42              |
| 1:A:328:ARG:NH1  | 1:A:578:ASP:OD2  | 2.53                     | 0.42              |
| 1:A:360:ASN:H    | 1:A:523:THR:HG23 | 1.85                     | 0.42              |
| 1:A:393:THR:OG1  | 1:A:516:GLU:C    | 2.58                     | 0.42              |

Continued on next page...

Continued from previous page...

| Atom-1           | Atom-2           | Interatomic distance (Å) | Clash overlap (Å) |
|------------------|------------------|--------------------------|-------------------|
| 3:C:205:SER:O    | 3:C:206:LYS:HG2  | 2.20                     | 0.42              |
| 3:C:336:CYS:SG   | 3:C:524:VAL:HG13 | 2.59                     | 0.42              |
| 3:C:425:LEU:HD12 | 3:C:425:LEU:HA   | 1.79                     | 0.42              |
| 5:V:6:GLN:OE1    | 5:V:102:THR:HG23 | 2.19                     | 0.42              |
| 4:P:35:ASN:ND2   | 4:P:35:ASN:H     | 2.18                     | 0.42              |
| 1:A:790:LYS:H    | 3:C:704:SER:HA   | 1.84                     | 0.42              |
| 2:B:332:ILE:O    | 2:B:362:VAL:HG23 | 2.20                     | 0.42              |
| 2:B:381:GLY:O    | 3:C:984:LEU:HD11 | 2.19                     | 0.42              |
| 2:B:555:SER:HB3  | 2:B:586:ASP:HB2  | 2.01                     | 0.42              |
| 2:B:856:ASN:OD1  | 2:B:856:ASN:N    | 2.50                     | 0.42              |
| 4:U:35:ASN:ND2   | 4:U:35:ASN:H     | 2.18                     | 0.42              |
| 4:U:108:VAL:O    | 4:U:108:VAL:HG13 | 2.19                     | 0.42              |
| 5:V:79:GLN:HA    | 5:V:80:PRO:HD2   | 1.86                     | 0.42              |
| 5:V:84:ALA:O     | 5:V:86:TYR:HD1   | 2.02                     | 0.42              |
| 1:A:391:CYS:HB3  | 1:A:522:ALA:HB1  | 2.02                     | 0.42              |
| 2:B:39:PRO:HG3   | 2:B:51:THR:HG21  | 2.02                     | 0.42              |
| 2:B:48:LEU:CD2   | 2:B:278:LYS:HG3  | 2.50                     | 0.42              |
| 2:B:396:TYR:OH   | 3:C:230:PRO:HB3  | 2.19                     | 0.42              |
| 3:C:402:ILE:H    | 3:C:402:ILE:HG13 | 1.77                     | 0.42              |
| 1:A:29:THR:HG22  | 1:A:30:ASN:N     | 2.34                     | 0.42              |
| 2:B:382:VAL:O    | 3:C:984:LEU:HD21 | 2.15                     | 0.42              |
| 2:B:916:LEU:HD12 | 2:B:923:ILE:HD12 | 2.02                     | 0.42              |
| 4:U:38:ARG:HB3   | 4:U:48:MET:HE1   | 2.02                     | 0.42              |
| 5:V:34:HIS:CE1   | 5:V:50:TYR:HD1   | 2.38                     | 0.42              |
| 5:V:62:PHE:HB3   | 5:V:75:ILE:HA    | 2.02                     | 0.42              |
| 5:Q:84:ALA:O     | 5:Q:86:TYR:HD1   | 2.02                     | 0.42              |
| 5:S:37:GLN:HB3   | 5:S:47:LEU:HD11  | 2.02                     | 0.42              |
| 1:A:326:ILE:O    | 1:A:326:ILE:HG13 | 2.19                     | 0.42              |
| 2:B:583:GLU:HG2  | 2:B:584:ILE:H    | 1.84                     | 0.42              |
| 3:C:280:ASN:CG   | 3:C:281:GLU:H    | 2.23                     | 0.42              |
| 3:C:363:ALA:H    | 3:C:525:CYS:H    | 1.67                     | 0.42              |
| 3:C:558:LYS:O    | 3:C:558:LYS:HG3  | 2.20                     | 0.42              |
| 3:C:33:THR:HA    | 3:C:58:PHE:CD1   | 2.55                     | 0.42              |
| 3:C:105:ILE:CD1  | 3:C:118:LEU:HG   | 2.50                     | 0.42              |
| 4:U:34:MET:SD    | 4:U:96:CYS:SG    | 3.18                     | 0.42              |
| 4:U:47:TRP:HZ2   | 4:U:50:TRP:HD1   | 1.66                     | 0.42              |
| 5:Q:34:HIS:CE1   | 5:Q:50:TYR:HD1   | 2.38                     | 0.42              |
| 4:P:37:VAL:O     | 4:P:95:TYR:N     | 2.45                     | 0.42              |
| 5:S:3:GLN:OE1    | 5:S:3:GLN:HA     | 2.20                     | 0.42              |
| 5:S:11:LEU:H     | 5:S:11:LEU:HD23  | 1.85                     | 0.42              |
| 1:A:809:PRO:HA   | 1:A:814:LYS:HE3  | 2.01                     | 0.42              |

Continued on next page...



Continued from previous page...

| Atom-1            | Atom-2            | Interatomic distance (Å) | Clash overlap (Å) |
|-------------------|-------------------|--------------------------|-------------------|
| 4:U:4:LEU:HD11    | 4:U:27:TYR:OH     | 2.19                     | 0.42              |
| 5:V:3:GLN:HA      | 5:V:3:GLN:OE1     | 2.20                     | 0.42              |
| 4:O:104:TRP:CE2   | 5:Q:94:TRP:HH2    | 2.38                     | 0.42              |
| 5:Q:62:PHE:HB3    | 5:Q:75:ILE:HA     | 2.02                     | 0.42              |
| 7:L:1:NAG:H61     | 7:L:2:NAG:H82     | 2.02                     | 0.42              |
| 2:B:368:LEU:N     | 2:B:368:LEU:CD1   | 2.83                     | 0.41              |
| 1:A:402:ILE:H     | 1:A:402:ILE:HG13  | 1.77                     | 0.41              |
| 2:B:126:VAL:HG13  | 2:B:172:SER:HB3   | 2.03                     | 0.41              |
| 2:B:552:LEU:HA    | 2:B:586:ASP:O     | 2.19                     | 0.41              |
| 3:C:1102:TRP:CZ2  | 3:C:1133:VAL:HG21 | 2.55                     | 0.41              |
| 4:U:39:GLN:HG3    | 4:U:45:LEU:HD23   | 2.01                     | 0.41              |
| 4:O:34:MET:SD     | 4:O:96:CYS:SG     | 3.18                     | 0.41              |
| 1:A:217:PRO:C     | 1:A:219:GLY:N     | 2.73                     | 0.41              |
| 1:A:394:ASN:O     | 1:A:515:PHE:HA    | 2.20                     | 0.41              |
| 1:A:868:GLU:OE2   | 1:A:868:GLU:N     | 2.51                     | 0.41              |
| 4:U:35:ASN:ND2    | 4:U:99:GLY:O      | 2.54                     | 0.41              |
| 4:U:62:ASP:HA     | 4:U:65:ARG:HH21   | 1.85                     | 0.41              |
| 4:U:104:TRP:CE2   | 5:V:94:TRP:HH2    | 2.39                     | 0.41              |
| 4:P:34:MET:SD     | 4:P:96:CYS:SG     | 3.18                     | 0.41              |
| 4:P:39:GLN:HG3    | 4:P:45:LEU:HD23   | 2.01                     | 0.41              |
| 2:B:577:ARG:HA    | 2:B:583:GLU:O     | 2.20                     | 0.41              |
| 5:Q:11:LEU:HD23   | 5:Q:11:LEU:H      | 1.85                     | 0.41              |
| 1:A:975:SER:OG    | 3:C:571:ASP:OD2   | 2.38                     | 0.41              |
| 2:B:1107:ARG:HD2  | 3:C:904:TYR:CE2   | 2.55                     | 0.41              |
| 3:C:31:SER:O      | 3:C:59:PHE:HA     | 2.20                     | 0.41              |
| 5:V:11:LEU:HD23   | 5:V:11:LEU:H      | 1.85                     | 0.41              |
| 4:P:35:ASN:ND2    | 4:P:99:GLY:O      | 2.54                     | 0.41              |
| 2:B:562:PHE:HB2   | 3:C:41:LYS:HE2    | 2.01                     | 0.41              |
| 2:B:733:LYS:HE3   | 2:B:771:ALA:O     | 2.21                     | 0.41              |
| 3:C:114:THR:HG22  | 3:C:115:GLN:N     | 2.35                     | 0.41              |
| 3:C:901:GLN:O     | 3:C:905:ARG:HG3   | 2.20                     | 0.41              |
| 2:B:382:VAL:CB    | 3:C:983:ARG:HD2   | 2.49                     | 0.41              |
| 2:B:552:LEU:CD2   | 2:B:587:ILE:HG12  | 2.51                     | 0.41              |
| 2:B:741:TYR:CE1   | 2:B:966:LEU:HD11  | 2.56                     | 0.41              |
| 2:B:1027:THR:HG22 | 2:B:1042:PHE:HZ   | 1.85                     | 0.41              |
| 1:A:134:GLN:NE2   | 1:A:162:SER:OG    | 2.32                     | 0.41              |
| 1:A:386:LYS:H     | 1:A:386:LYS:HG3   | 1.58                     | 0.41              |
| 2:B:363:ALA:H     | 2:B:525:CYS:C     | 2.24                     | 0.41              |
| 2:B:437:ASN:HB2   | 2:B:508:TYR:CE2   | 2.56                     | 0.41              |
| 2:B:980:ILE:HG13  | 2:B:981:LEU:N     | 2.36                     | 0.41              |
| 3:C:437:ASN:HB2   | 3:C:508:TYR:CE1   | 2.56                     | 0.41              |

Continued on next page...

Continued from previous page...

| Atom-1           | Atom-2           | Interatomic distance (Å) | Clash overlap (Å) |
|------------------|------------------|--------------------------|-------------------|
| 4:U:50:TRP:CG    | 4:U:104:TRP:HH2  | 2.39                     | 0.41              |
| 4:O:35:ASN:H     | 4:O:35:ASN:ND2   | 2.18                     | 0.41              |
| 4:O:39:GLN:NE2   | 4:O:40:ALA:O     | 2.54                     | 0.41              |
| 4:O:60:TYR:CE1   | 4:O:69:VAL:HA    | 2.56                     | 0.41              |
| 1:A:336:CYS:HA   | 1:A:337:PRO:HD3  | 1.95                     | 0.41              |
| 1:A:368:LEU:N    | 1:A:368:LEU:CD1  | 2.83                     | 0.41              |
| 1:A:743:CYS:SG   | 1:A:750:SER:N    | 2.93                     | 0.41              |
| 1:A:789:TYR:HD1  | 3:C:703:ASN:O    | 2.04                     | 0.41              |
| 2:B:172:SER:OG   | 2:B:173:GLN:N    | 2.53                     | 0.41              |
| 2:B:658:ASN:ND2  | 2:B:660:TYR:CZ   | 2.89                     | 0.41              |
| 2:B:658:ASN:ND2  | 2:B:660:TYR:OH   | 2.42                     | 0.41              |
| 3:C:461:LEU:HD13 | 3:C:461:LEU:HA   | 1.90                     | 0.41              |
| 5:V:91:SER:HA    | 5:V:96:LEU:HD22  | 2.03                     | 0.41              |
| 4:O:50:TRP:CG    | 4:O:104:TRP:HH2  | 2.39                     | 0.41              |
| 5:Q:3:GLN:HA     | 5:Q:3:GLN:OE1    | 2.20                     | 0.41              |
| 4:P:62:ASP:HA    | 4:P:65:ARG:HH21  | 1.85                     | 0.41              |
| 4:P:104:TRP:CE2  | 5:S:94:TRP:HH2   | 2.38                     | 0.41              |
| 5:S:62:PHE:HB3   | 5:S:75:ILE:HA    | 2.02                     | 0.41              |
| 1:A:441:LEU:HD13 | 1:A:441:LEU:HA   | 1.91                     | 0.41              |
| 2:B:583:GLU:HG2  | 2:B:584:ILE:N    | 2.36                     | 0.41              |
| 4:U:39:GLN:NE2   | 4:U:40:ALA:O     | 2.54                     | 0.41              |
| 5:V:37:GLN:HB3   | 5:V:47:LEU:HD11  | 2.02                     | 0.41              |
| 4:O:95:TYR:CE2   | 5:Q:44:PRO:HD2   | 2.56                     | 0.41              |
| 5:Q:34:HIS:CE1   | 5:Q:50:TYR:CD1   | 3.05                     | 0.41              |
| 5:Q:37:GLN:HB3   | 5:Q:47:LEU:HD11  | 2.02                     | 0.41              |
| 4:P:4:LEU:HD13   | 4:P:109:TRP:NE1  | 2.21                     | 0.41              |
| 5:S:91:SER:HA    | 5:S:96:LEU:HD22  | 2.03                     | 0.41              |
| 1:A:303:LEU:HD23 | 1:A:308:VAL:HG12 | 2.03                     | 0.40              |
| 2:B:29:THR:HG22  | 2:B:30:ASN:N     | 2.37                     | 0.40              |
| 3:C:90:VAL:HG21  | 3:C:238:PHE:CE1  | 2.56                     | 0.40              |
| 5:V:104:LEU:HD23 | 5:V:104:LEU:HA   | 1.91                     | 0.40              |
| 4:O:35:ASN:ND2   | 4:O:99:GLY:O     | 2.54                     | 0.40              |
| 4:P:95:TYR:CE2   | 5:S:44:PRO:HD2   | 2.56                     | 0.40              |
| 1:A:34:ARG:NH2   | 1:A:217:PRO:HB2  | 2.36                     | 0.40              |
| 1:A:643:PHE:CE2  | 1:A:645:THR:HG22 | 2.56                     | 0.40              |
| 3:C:189:LEU:HD12 | 3:C:216:LEU:HD11 | 2.03                     | 0.40              |
| 5:V:21:ILE:O     | 5:V:21:ILE:HG13  | 2.22                     | 0.40              |
| 4:O:98:ARG:HH21  | 4:O:109:TRP:HH2  | 1.69                     | 0.40              |
| 4:P:50:TRP:CG    | 4:P:104:TRP:HH2  | 2.39                     | 0.40              |
| 5:S:6:GLN:NE2    | 5:S:88:CYS:H     | 2.17                     | 0.40              |
| 2:B:326:ILE:HG13 | 2:B:326:ILE:O    | 2.21                     | 0.40              |

Continued on next page...

Continued from previous page...

| Atom-1           | Atom-2           | Interatomic distance (Å) | Clash overlap (Å) |
|------------------|------------------|--------------------------|-------------------|
| 3:C:90:VAL:HG23  | 3:C:267:VAL:HG13 | 2.02                     | 0.40              |
| 3:C:386:LYS:H    | 3:C:386:LYS:HG3  | 1.59                     | 0.40              |
| 3:C:959:LEU:HD23 | 3:C:959:LEU:HA   | 1.89                     | 0.40              |
| 5:V:61:ARG:HG3   | 5:V:62:PHE:CD2   | 2.57                     | 0.40              |
| 5:S:61:ARG:HG3   | 5:S:62:PHE:CD1   | 2.57                     | 0.40              |
| 2:B:280:ASN:CG   | 2:B:281:GLU:N    | 2.75                     | 0.40              |
| 2:B:410:ILE:H    | 2:B:410:ILE:HG12 | 1.71                     | 0.40              |
| 2:B:560:LEU:N    | 2:B:563:GLN:OE1  | 2.55                     | 0.40              |
| 4:U:95:TYR:CE2   | 5:V:44:PRO:HD2   | 2.56                     | 0.40              |
| 5:S:9:SER:O      | 5:S:102:THR:HA   | 2.22                     | 0.40              |
| 7:M:1:NAG:O4     | 7:M:2:NAG:O7     | 2.39                     | 0.40              |
| 1:A:914:ASN:O    | 1:A:918:GLU:HG3  | 2.22                     | 0.40              |
| 2:B:805:ILE:HD11 | 2:B:931:ILE:HD12 | 2.03                     | 0.40              |
| 3:C:368:LEU:N    | 3:C:368:LEU:CD1  | 2.83                     | 0.40              |

There are no symmetry-related clashes.

### 5.3 Torsion angles [i](#)

#### 5.3.1 Protein backbone [i](#)

In the following table, the Percentiles column shows the percent Ramachandran outliers of the chain as a percentile score with respect to all PDB entries followed by that with respect to all EM entries.

The Analysed column shows the number of residues for which the backbone conformation was analysed, and the total number of residues.

| Mol | Chain | Analysed       | Favoured  | Allowed  | Outliers | Percentiles |     |
|-----|-------|----------------|-----------|----------|----------|-------------|-----|
| 1   | A     | 988/1016 (97%) | 901 (91%) | 74 (8%)  | 13 (1%)  | 12          | 47  |
| 2   | B     | 982/1000 (98%) | 891 (91%) | 80 (8%)  | 11 (1%)  | 14          | 50  |
| 3   | C     | 982/1000 (98%) | 893 (91%) | 76 (8%)  | 13 (1%)  | 12          | 47  |
| 4   | O     | 116/118 (98%)  | 94 (81%)  | 22 (19%) | 0        | 100         | 100 |
| 4   | P     | 116/118 (98%)  | 94 (81%)  | 22 (19%) | 0        | 100         | 100 |
| 4   | U     | 116/118 (98%)  | 94 (81%)  | 22 (19%) | 0        | 100         | 100 |
| 5   | Q     | 105/107 (98%)  | 92 (88%)  | 13 (12%) | 0        | 100         | 100 |
| 5   | S     | 105/107 (98%)  | 92 (88%)  | 13 (12%) | 0        | 100         | 100 |
| 5   | V     | 105/107 (98%)  | 92 (88%)  | 13 (12%) | 0        | 100         | 100 |

Continued on next page...



Continued from previous page...

| Mol | Chain | Analysed        | Favoured   | Allowed  | Outliers | Percentiles |
|-----|-------|-----------------|------------|----------|----------|-------------|
| All | All   | 3615/3691 (98%) | 3243 (90%) | 335 (9%) | 37 (1%)  | 20 51       |

All (37) Ramachandran outliers are listed below:

| Mol | Chain | Res | Type |
|-----|-------|-----|------|
| 1   | A     | 378 | LYS  |
| 1   | A     | 516 | GLU  |
| 1   | A     | 613 | GLN  |
| 2   | B     | 32  | PHE  |
| 2   | B     | 378 | LYS  |
| 3   | C     | 332 | ILE  |
| 3   | C     | 378 | LYS  |
| 1   | A     | 32  | PHE  |
| 1   | A     | 110 | LEU  |
| 1   | A     | 422 | ASN  |
| 1   | A     | 492 | LEU  |
| 2   | B     | 422 | ASN  |
| 2   | B     | 492 | LEU  |
| 2   | B     | 703 | ASN  |
| 3   | C     | 422 | ASN  |
| 3   | C     | 492 | LEU  |
| 3   | C     | 516 | GLU  |
| 3   | C     | 518 | LEU  |
| 1   | A     | 385 | THR  |
| 1   | A     | 477 | SER  |
| 1   | A     | 491 | PRO  |
| 2   | B     | 385 | THR  |
| 2   | B     | 477 | SER  |
| 2   | B     | 491 | PRO  |
| 3   | C     | 385 | THR  |
| 3   | C     | 477 | SER  |
| 3   | C     | 491 | PRO  |
| 3   | C     | 333 | THR  |
| 1   | A     | 218 | GLN  |
| 2   | B     | 518 | LEU  |
| 3   | C     | 481 | ASN  |
| 1   | A     | 463 | PRO  |
| 2   | B     | 463 | PRO  |
| 3   | C     | 463 | PRO  |
| 2   | B     | 445 | VAL  |
| 1   | A     | 445 | VAL  |
| 3   | C     | 445 | VAL  |

### 5.3.2 Protein sidechains [i](#)

In the following table, the Percentiles column shows the percent sidechain outliers of the chain as a percentile score with respect to all PDB entries followed by that with respect to all EM entries.

The Analysed column shows the number of residues for which the sidechain conformation was analysed, and the total number of residues.

| Mol | Chain | Analysed        | Rotameric  | Outliers | Percentiles |     |
|-----|-------|-----------------|------------|----------|-------------|-----|
| 1   | A     | 857/880 (97%)   | 783 (91%)  | 74 (9%)  | 10          | 39  |
| 2   | B     | 858/877 (98%)   | 784 (91%)  | 74 (9%)  | 10          | 39  |
| 3   | C     | 844/875 (96%)   | 764 (90%)  | 80 (10%) | 8           | 34  |
| 4   | O     | 97/97 (100%)    | 97 (100%)  | 0        | 100         | 100 |
| 4   | P     | 97/97 (100%)    | 97 (100%)  | 0        | 100         | 100 |
| 4   | U     | 97/97 (100%)    | 97 (100%)  | 0        | 100         | 100 |
| 5   | Q     | 94/94 (100%)    | 94 (100%)  | 0        | 100         | 100 |
| 5   | S     | 94/94 (100%)    | 94 (100%)  | 0        | 100         | 100 |
| 5   | V     | 94/94 (100%)    | 94 (100%)  | 0        | 100         | 100 |
| All | All   | 3132/3205 (98%) | 2904 (93%) | 228 (7%) | 18          | 44  |

All (228) residues with a non-rotameric sidechain are listed below:

| Mol | Chain | Res | Type |
|-----|-------|-----|------|
| 1   | A     | 31  | SER  |
| 1   | A     | 33  | THR  |
| 1   | A     | 80  | ASP  |
| 1   | A     | 157 | PHE  |
| 1   | A     | 206 | LYS  |
| 1   | A     | 208 | THR  |
| 1   | A     | 218 | GLN  |
| 1   | A     | 284 | THR  |
| 1   | A     | 331 | ASN  |
| 1   | A     | 332 | ILE  |
| 1   | A     | 333 | THR  |
| 1   | A     | 334 | ASN  |
| 1   | A     | 335 | LEU  |
| 1   | A     | 356 | LYS  |
| 1   | A     | 367 | VAL  |
| 1   | A     | 376 | THR  |
| 1   | A     | 378 | LYS  |
| 1   | A     | 382 | VAL  |

*Continued on next page...*

*Continued from previous page...*

| Mol | Chain | Res | Type |
|-----|-------|-----|------|
| 1   | A     | 386 | LYS  |
| 1   | A     | 387 | LEU  |
| 1   | A     | 389 | ASP  |
| 1   | A     | 394 | ASN  |
| 1   | A     | 398 | ASP  |
| 1   | A     | 402 | ILE  |
| 1   | A     | 405 | ASP  |
| 1   | A     | 407 | VAL  |
| 1   | A     | 408 | ARG  |
| 1   | A     | 409 | GLN  |
| 1   | A     | 410 | ILE  |
| 1   | A     | 422 | ASN  |
| 1   | A     | 424 | LYS  |
| 1   | A     | 425 | LEU  |
| 1   | A     | 428 | ASP  |
| 1   | A     | 430 | THR  |
| 1   | A     | 434 | ILE  |
| 1   | A     | 436 | TRP  |
| 1   | A     | 440 | ASN  |
| 1   | A     | 441 | LEU  |
| 1   | A     | 443 | SER  |
| 1   | A     | 444 | LYS  |
| 1   | A     | 450 | ASN  |
| 1   | A     | 452 | LEU  |
| 1   | A     | 454 | ARG  |
| 1   | A     | 455 | LEU  |
| 1   | A     | 456 | PHE  |
| 1   | A     | 458 | LYS  |
| 1   | A     | 459 | SER  |
| 1   | A     | 462 | LYS  |
| 1   | A     | 463 | PRO  |
| 1   | A     | 466 | ARG  |
| 1   | A     | 472 | ILE  |
| 1   | A     | 480 | CYS  |
| 1   | A     | 483 | VAL  |
| 1   | A     | 484 | LYS  |
| 1   | A     | 493 | GLN  |
| 1   | A     | 495 | TYR  |
| 1   | A     | 498 | GLN  |
| 1   | A     | 503 | VAL  |
| 1   | A     | 508 | TYR  |
| 1   | A     | 512 | VAL  |

*Continued on next page...*

*Continued from previous page...*

| Mol | Chain | Res | Type |
|-----|-------|-----|------|
| 1   | A     | 516 | GLU  |
| 1   | A     | 517 | LEU  |
| 1   | A     | 518 | LEU  |
| 1   | A     | 599 | THR  |
| 1   | A     | 602 | THR  |
| 1   | A     | 613 | GLN  |
| 1   | A     | 615 | VAL  |
| 1   | A     | 701 | VAL  |
| 1   | A     | 716 | THR  |
| 1   | A     | 738 | CYS  |
| 1   | A     | 747 | THR  |
| 1   | A     | 881 | THR  |
| 1   | A     | 937 | SER  |
| 1   | A     | 967 | SER  |
| 2   | B     | 34  | ARG  |
| 2   | B     | 50  | SER  |
| 2   | B     | 134 | GLN  |
| 2   | B     | 167 | THR  |
| 2   | B     | 205 | SER  |
| 2   | B     | 274 | THR  |
| 2   | B     | 331 | ASN  |
| 2   | B     | 334 | ASN  |
| 2   | B     | 356 | LYS  |
| 2   | B     | 367 | VAL  |
| 2   | B     | 376 | THR  |
| 2   | B     | 378 | LYS  |
| 2   | B     | 382 | VAL  |
| 2   | B     | 386 | LYS  |
| 2   | B     | 387 | LEU  |
| 2   | B     | 389 | ASP  |
| 2   | B     | 394 | ASN  |
| 2   | B     | 398 | ASP  |
| 2   | B     | 402 | ILE  |
| 2   | B     | 405 | ASP  |
| 2   | B     | 407 | VAL  |
| 2   | B     | 408 | ARG  |
| 2   | B     | 409 | GLN  |
| 2   | B     | 410 | ILE  |
| 2   | B     | 422 | ASN  |
| 2   | B     | 424 | LYS  |
| 2   | B     | 425 | LEU  |
| 2   | B     | 428 | ASP  |

*Continued on next page...*

*Continued from previous page...*

| Mol | Chain | Res | Type |
|-----|-------|-----|------|
| 2   | B     | 430 | THR  |
| 2   | B     | 434 | ILE  |
| 2   | B     | 436 | TRP  |
| 2   | B     | 440 | ASN  |
| 2   | B     | 441 | LEU  |
| 2   | B     | 443 | SER  |
| 2   | B     | 444 | LYS  |
| 2   | B     | 450 | ASN  |
| 2   | B     | 452 | LEU  |
| 2   | B     | 454 | ARG  |
| 2   | B     | 455 | LEU  |
| 2   | B     | 456 | PHE  |
| 2   | B     | 458 | LYS  |
| 2   | B     | 459 | SER  |
| 2   | B     | 462 | LYS  |
| 2   | B     | 463 | PRO  |
| 2   | B     | 466 | ARG  |
| 2   | B     | 472 | ILE  |
| 2   | B     | 480 | CYS  |
| 2   | B     | 483 | VAL  |
| 2   | B     | 484 | LYS  |
| 2   | B     | 493 | GLN  |
| 2   | B     | 495 | TYR  |
| 2   | B     | 498 | GLN  |
| 2   | B     | 503 | VAL  |
| 2   | B     | 508 | TYR  |
| 2   | B     | 512 | VAL  |
| 2   | B     | 517 | LEU  |
| 2   | B     | 518 | LEU  |
| 2   | B     | 531 | THR  |
| 2   | B     | 532 | ASN  |
| 2   | B     | 546 | LEU  |
| 2   | B     | 558 | LYS  |
| 2   | B     | 567 | ARG  |
| 2   | B     | 581 | THR  |
| 2   | B     | 586 | ASP  |
| 2   | B     | 615 | VAL  |
| 2   | B     | 638 | THR  |
| 2   | B     | 701 | VAL  |
| 2   | B     | 703 | ASN  |
| 2   | B     | 738 | CYS  |
| 2   | B     | 938 | LEU  |

*Continued on next page...*

*Continued from previous page...*

| Mol | Chain | Res  | Type |
|-----|-------|------|------|
| 2   | B     | 940  | SER  |
| 2   | B     | 983  | ARG  |
| 2   | B     | 1037 | SER  |
| 2   | B     | 1097 | SER  |
| 3   | C     | 33   | THR  |
| 3   | C     | 63   | THR  |
| 3   | C     | 126  | VAL  |
| 3   | C     | 167  | THR  |
| 3   | C     | 175  | PHE  |
| 3   | C     | 276  | LEU  |
| 3   | C     | 284  | THR  |
| 3   | C     | 334  | ASN  |
| 3   | C     | 335  | LEU  |
| 3   | C     | 356  | LYS  |
| 3   | C     | 367  | VAL  |
| 3   | C     | 376  | THR  |
| 3   | C     | 378  | LYS  |
| 3   | C     | 382  | VAL  |
| 3   | C     | 386  | LYS  |
| 3   | C     | 387  | LEU  |
| 3   | C     | 389  | ASP  |
| 3   | C     | 394  | ASN  |
| 3   | C     | 398  | ASP  |
| 3   | C     | 402  | ILE  |
| 3   | C     | 405  | ASP  |
| 3   | C     | 407  | VAL  |
| 3   | C     | 408  | ARG  |
| 3   | C     | 409  | GLN  |
| 3   | C     | 410  | ILE  |
| 3   | C     | 422  | ASN  |
| 3   | C     | 424  | LYS  |
| 3   | C     | 425  | LEU  |
| 3   | C     | 428  | ASP  |
| 3   | C     | 430  | THR  |
| 3   | C     | 434  | ILE  |
| 3   | C     | 436  | TRP  |
| 3   | C     | 440  | ASN  |
| 3   | C     | 441  | LEU  |
| 3   | C     | 443  | SER  |
| 3   | C     | 444  | LYS  |
| 3   | C     | 450  | ASN  |
| 3   | C     | 452  | LEU  |

*Continued on next page...*



*Continued from previous page...*

| Mol | Chain | Res  | Type |
|-----|-------|------|------|
| 3   | C     | 454  | ARG  |
| 3   | C     | 455  | LEU  |
| 3   | C     | 456  | PHE  |
| 3   | C     | 458  | LYS  |
| 3   | C     | 459  | SER  |
| 3   | C     | 462  | LYS  |
| 3   | C     | 463  | PRO  |
| 3   | C     | 466  | ARG  |
| 3   | C     | 472  | ILE  |
| 3   | C     | 480  | CYS  |
| 3   | C     | 483  | VAL  |
| 3   | C     | 484  | LYS  |
| 3   | C     | 493  | GLN  |
| 3   | C     | 495  | TYR  |
| 3   | C     | 498  | GLN  |
| 3   | C     | 503  | VAL  |
| 3   | C     | 508  | TYR  |
| 3   | C     | 512  | VAL  |
| 3   | C     | 514  | SER  |
| 3   | C     | 516  | GLU  |
| 3   | C     | 518  | LEU  |
| 3   | C     | 539  | VAL  |
| 3   | C     | 568  | ASP  |
| 3   | C     | 586  | ASP  |
| 3   | C     | 591  | SER  |
| 3   | C     | 599  | THR  |
| 3   | C     | 615  | VAL  |
| 3   | C     | 701  | VAL  |
| 3   | C     | 704  | SER  |
| 3   | C     | 705  | VAL  |
| 3   | C     | 760  | CYS  |
| 3   | C     | 785  | VAL  |
| 3   | C     | 819  | GLU  |
| 3   | C     | 856  | ASN  |
| 3   | C     | 860  | VAL  |
| 3   | C     | 881  | THR  |
| 3   | C     | 887  | THR  |
| 3   | C     | 904  | TYR  |
| 3   | C     | 974  | SER  |
| 3   | C     | 980  | ILE  |
| 3   | C     | 1077 | THR  |
| 3   | C     | 1136 | THR  |

Sometimes sidechains can be flipped to improve hydrogen bonding and reduce clashes. All (41) such sidechains are listed below:

| Mol | Chain | Res  | Type |
|-----|-------|------|------|
| 1   | A     | 218  | GLN  |
| 1   | A     | 239  | GLN  |
| 1   | A     | 280  | ASN  |
| 1   | A     | 474  | GLN  |
| 1   | A     | 532  | ASN  |
| 1   | A     | 563  | GLN  |
| 1   | A     | 580  | GLN  |
| 1   | A     | 613  | GLN  |
| 1   | A     | 751  | ASN  |
| 1   | A     | 914  | ASN  |
| 1   | A     | 1071 | GLN  |
| 1   | A     | 1101 | HIS  |
| 1   | A     | 1135 | ASN  |
| 2   | B     | 52   | GLN  |
| 2   | B     | 137  | ASN  |
| 2   | B     | 207  | HIS  |
| 2   | B     | 334  | ASN  |
| 2   | B     | 474  | GLN  |
| 2   | B     | 655  | HIS  |
| 2   | B     | 762  | GLN  |
| 2   | B     | 784  | GLN  |
| 2   | B     | 804  | GLN  |
| 2   | B     | 935  | GLN  |
| 2   | B     | 1005 | GLN  |
| 2   | B     | 1101 | HIS  |
| 3   | C     | 61   | ASN  |
| 3   | C     | 134  | GLN  |
| 3   | C     | 280  | ASN  |
| 3   | C     | 394  | ASN  |
| 3   | C     | 474  | GLN  |
| 3   | C     | 935  | GLN  |
| 3   | C     | 1005 | GLN  |
| 3   | C     | 1135 | ASN  |
| 4   | U     | 82   | GLN  |
| 5   | V     | 34   | HIS  |
| 5   | V     | 89   | GLN  |
| 4   | O     | 82   | GLN  |
| 5   | Q     | 89   | GLN  |
| 4   | P     | 82   | GLN  |
| 5   | S     | 34   | HIS  |
| 5   | S     | 89   | GLN  |

### 5.3.3 RNA [i](#)

There are no RNA molecules in this entry.

### 5.4 Non-standard residues in protein, DNA, RNA chains [i](#)

There are no non-standard protein/DNA/RNA residues in this entry.

### 5.5 Carbohydrates [i](#)

29 monosaccharides are modelled in this entry.

In the following table, the Counts columns list the number of bonds (or angles) for which Mogul statistics could be retrieved, the number of bonds (or angles) that are observed in the model and the number of bonds (or angles) that are defined in the Chemical Component Dictionary. The Link column lists molecule types, if any, to which the group is linked. The Z score for a bond length (or angle) is the number of standard deviations the observed value is removed from the expected value. A bond length (or angle) with  $|Z| > 2$  is considered an outlier worth inspection. RMSZ is the root-mean-square of all Z scores of the bond lengths (or angles).

| Mol | Type | Chain | Res | Link | Bond lengths |      |          | Bond angles |      |          |
|-----|------|-------|-----|------|--------------|------|----------|-------------|------|----------|
|     |      |       |     |      | Counts       | RMSZ | # Z  > 2 | Counts      | RMSZ | # Z  > 2 |
| 6   | NAG  | D     | 1   | 6,1  | 14,14,15     | 0.73 | 1 (7%)   | 17,19,21    | 2.54 | 6 (35%)  |
| 6   | NAG  | D     | 2   | 6    | 14,14,15     | 0.52 | 0        | 17,19,21    | 1.14 | 2 (11%)  |
| 6   | BMA  | D     | 3   | 6    | 11,11,12     | 0.44 | 0        | 15,15,17    | 0.49 | 0        |
| 6   | NAG  | E     | 1   | 6,2  | 14,14,15     | 0.74 | 1 (7%)   | 17,19,21    | 2.54 | 6 (35%)  |
| 6   | NAG  | E     | 2   | 6    | 14,14,15     | 0.49 | 0        | 17,19,21    | 1.12 | 2 (11%)  |
| 6   | BMA  | E     | 3   | 6    | 11,11,12     | 0.44 | 0        | 15,15,17    | 0.49 | 0        |
| 6   | NAG  | F     | 1   | 3,6  | 14,14,15     | 0.74 | 1 (7%)   | 17,19,21    | 2.53 | 6 (35%)  |
| 6   | NAG  | F     | 2   | 6    | 14,14,15     | 0.50 | 0        | 17,19,21    | 1.12 | 2 (11%)  |
| 6   | BMA  | F     | 3   | 6    | 11,11,12     | 0.43 | 0        | 15,15,17    | 0.48 | 0        |
| 7   | NAG  | G     | 1   | 7    | 14,14,15     | 0.75 | 1 (7%)   | 17,19,21    | 0.61 | 0        |
| 7   | NAG  | G     | 2   | 7    | 14,14,15     | 0.42 | 0        | 17,19,21    | 1.23 | 1 (5%)   |
| 7   | NAG  | H     | 1   | 7,1  | 14,14,15     | 0.38 | 0        | 17,19,21    | 0.53 | 0        |
| 7   | NAG  | H     | 2   | 7    | 14,14,15     | 0.33 | 0        | 17,19,21    | 0.38 | 0        |
| 7   | NAG  | I     | 1   | 7,1  | 14,14,15     | 0.28 | 0        | 17,19,21    | 0.62 | 1 (5%)   |
| 7   | NAG  | I     | 2   | 7    | 14,14,15     | 0.29 | 0        | 17,19,21    | 0.37 | 0        |
| 7   | NAG  | J     | 1   | 7,1  | 14,14,15     | 1.03 | 1 (7%)   | 17,19,21    | 0.92 | 1 (5%)   |
| 7   | NAG  | J     | 2   | 7    | 14,14,15     | 0.26 | 0        | 17,19,21    | 0.41 | 0        |
| 7   | NAG  | K     | 1   | 7,1  | 14,14,15     | 0.38 | 0        | 17,19,21    | 1.27 | 2 (11%)  |
| 7   | NAG  | K     | 2   | 7    | 14,14,15     | 0.40 | 0        | 17,19,21    | 1.27 | 1 (5%)   |
| 7   | NAG  | L     | 1   | 7,2  | 14,14,15     | 0.49 | 0        | 17,19,21    | 0.44 | 0        |

| Mol | Type | Chain | Res | Link | Bond lengths |      |          | Bond angles |      |          |
|-----|------|-------|-----|------|--------------|------|----------|-------------|------|----------|
|     |      |       |     |      | Counts       | RMSZ | # Z  > 2 | Counts      | RMSZ | # Z  > 2 |
| 7   | NAG  | L     | 2   | 7    | 14,14,15     | 0.22 | 0        | 17,19,21    | 0.43 | 0        |
| 7   | NAG  | M     | 1   | 7,2  | 14,14,15     | 0.78 | 1 (7%)   | 17,19,21    | 0.78 | 1 (5%)   |
| 7   | NAG  | M     | 2   | 7    | 14,14,15     | 0.75 | 1 (7%)   | 17,19,21    | 0.71 | 0        |
| 7   | NAG  | N     | 1   | 3,7  | 14,14,15     | 0.33 | 0        | 17,19,21    | 0.38 | 0        |
| 7   | NAG  | N     | 2   | 7    | 14,14,15     | 0.18 | 0        | 17,19,21    | 0.50 | 0        |
| 7   | NAG  | R     | 1   | 3,7  | 14,14,15     | 0.73 | 1 (7%)   | 17,19,21    | 0.68 | 0        |
| 7   | NAG  | R     | 2   | 7    | 14,14,15     | 0.20 | 0        | 17,19,21    | 0.42 | 0        |
| 7   | NAG  | T     | 1   | 3,7  | 14,14,15     | 0.51 | 0        | 17,19,21    | 0.50 | 0        |
| 7   | NAG  | T     | 2   | 7    | 14,14,15     | 0.21 | 0        | 17,19,21    | 0.47 | 0        |

In the following table, the Chirals column lists the number of chiral outliers, the number of chiral centers analysed, the number of these observed in the model and the number defined in the Chemical Component Dictionary. Similar counts are reported in the Torsion and Rings columns. '-' means no outliers of that kind were identified.

| Mol | Type | Chain | Res | Link | Chirals | Torsions  | Rings   |
|-----|------|-------|-----|------|---------|-----------|---------|
| 6   | NAG  | D     | 1   | 6,1  | -       | 3/6/23/26 | 0/1/1/1 |
| 6   | NAG  | D     | 2   | 6    | -       | 6/6/23/26 | 0/1/1/1 |
| 6   | BMA  | D     | 3   | 6    | -       | 0/2/19/22 | 0/1/1/1 |
| 6   | NAG  | E     | 1   | 6,2  | -       | 3/6/23/26 | 0/1/1/1 |
| 6   | NAG  | E     | 2   | 6    | -       | 6/6/23/26 | 0/1/1/1 |
| 6   | BMA  | E     | 3   | 6    | -       | 0/2/19/22 | 0/1/1/1 |
| 6   | NAG  | F     | 1   | 3,6  | -       | 3/6/23/26 | 0/1/1/1 |
| 6   | NAG  | F     | 2   | 6    | -       | 6/6/23/26 | 0/1/1/1 |
| 6   | BMA  | F     | 3   | 6    | -       | 0/2/19/22 | 0/1/1/1 |
| 7   | NAG  | G     | 1   | 7    | -       | 0/6/23/26 | 0/1/1/1 |
| 7   | NAG  | G     | 2   | 7    | -       | 5/6/23/26 | 0/1/1/1 |
| 7   | NAG  | H     | 1   | 7,1  | -       | 0/6/23/26 | 0/1/1/1 |
| 7   | NAG  | H     | 2   | 7    | -       | 1/6/23/26 | 0/1/1/1 |
| 7   | NAG  | I     | 1   | 7,1  | -       | 0/6/23/26 | 0/1/1/1 |
| 7   | NAG  | I     | 2   | 7    | -       | 1/6/23/26 | 0/1/1/1 |
| 7   | NAG  | J     | 1   | 7,1  | -       | 3/6/23/26 | 0/1/1/1 |
| 7   | NAG  | J     | 2   | 7    | -       | 2/6/23/26 | 0/1/1/1 |
| 7   | NAG  | K     | 1   | 7,1  | -       | 4/6/23/26 | 0/1/1/1 |
| 7   | NAG  | K     | 2   | 7    | -       | 5/6/23/26 | 0/1/1/1 |
| 7   | NAG  | L     | 1   | 7,2  | -       | 1/6/23/26 | 0/1/1/1 |
| 7   | NAG  | L     | 2   | 7    | -       | 0/6/23/26 | 0/1/1/1 |
| 7   | NAG  | M     | 1   | 7,2  | -       | 2/6/23/26 | 0/1/1/1 |
| 7   | NAG  | M     | 2   | 7    | -       | 3/6/23/26 | 0/1/1/1 |

Continued on next page...

Continued from previous page...

| Mol | Type | Chain | Res | Link | Chirals | Torsions  | Rings   |
|-----|------|-------|-----|------|---------|-----------|---------|
| 7   | NAG  | N     | 1   | 3,7  | -       | 2/6/23/26 | 0/1/1/1 |
| 7   | NAG  | N     | 2   | 7    | -       | 2/6/23/26 | 0/1/1/1 |
| 7   | NAG  | R     | 1   | 3,7  | -       | 2/6/23/26 | 0/1/1/1 |
| 7   | NAG  | R     | 2   | 7    | -       | 2/6/23/26 | 0/1/1/1 |
| 7   | NAG  | T     | 1   | 3,7  | -       | 2/6/23/26 | 0/1/1/1 |
| 7   | NAG  | T     | 2   | 7    | -       | 1/6/23/26 | 0/1/1/1 |

All (8) bond length outliers are listed below:

| Mol | Chain | Res | Type | Atoms | Z     | Observed(Å) | Ideal(Å) |
|-----|-------|-----|------|-------|-------|-------------|----------|
| 7   | J     | 1   | NAG  | O5-C1 | -3.68 | 1.37        | 1.43     |
| 7   | M     | 1   | NAG  | O5-C1 | -2.71 | 1.39        | 1.43     |
| 7   | R     | 1   | NAG  | O5-C1 | -2.68 | 1.39        | 1.43     |
| 7   | G     | 1   | NAG  | O5-C1 | -2.62 | 1.39        | 1.43     |
| 6   | E     | 1   | NAG  | O5-C1 | -2.28 | 1.40        | 1.43     |
| 6   | F     | 1   | NAG  | O5-C1 | -2.28 | 1.40        | 1.43     |
| 6   | D     | 1   | NAG  | O5-C1 | -2.23 | 1.40        | 1.43     |
| 7   | M     | 2   | NAG  | O5-C1 | -2.04 | 1.40        | 1.43     |

All (31) bond angle outliers are listed below:

| Mol | Chain | Res | Type | Atoms    | Z     | Observed(°) | Ideal(°) |
|-----|-------|-----|------|----------|-------|-------------|----------|
| 6   | D     | 1   | NAG  | C1-O5-C5 | -7.33 | 102.27      | 112.19   |
| 6   | E     | 1   | NAG  | C1-O5-C5 | -7.31 | 102.28      | 112.19   |
| 6   | F     | 1   | NAG  | C1-O5-C5 | -7.30 | 102.30      | 112.19   |
| 7   | K     | 2   | NAG  | C2-N2-C7 | 4.33  | 129.06      | 122.90   |
| 7   | K     | 1   | NAG  | C2-N2-C7 | 4.32  | 129.06      | 122.90   |
| 7   | G     | 2   | NAG  | C2-N2-C7 | 4.23  | 128.93      | 122.90   |
| 6   | E     | 1   | NAG  | C6-C5-C4 | 3.30  | 120.73      | 113.00   |
| 6   | F     | 1   | NAG  | C6-C5-C4 | 3.29  | 120.71      | 113.00   |
| 6   | D     | 1   | NAG  | C6-C5-C4 | 3.29  | 120.70      | 113.00   |
| 6   | D     | 1   | NAG  | O5-C5-C4 | -3.27 | 102.86      | 110.83   |
| 6   | F     | 1   | NAG  | O5-C5-C4 | -3.27 | 102.87      | 110.83   |
| 6   | E     | 1   | NAG  | O5-C5-C4 | -3.26 | 102.89      | 110.83   |
| 6   | D     | 2   | NAG  | C1-O5-C5 | 3.06  | 116.34      | 112.19   |
| 6   | D     | 1   | NAG  | C4-C3-C2 | 3.03  | 115.47      | 111.02   |
| 6   | E     | 1   | NAG  | C4-C3-C2 | 3.03  | 115.45      | 111.02   |
| 6   | F     | 1   | NAG  | C4-C3-C2 | 3.02  | 115.44      | 111.02   |
| 6   | F     | 2   | NAG  | C1-O5-C5 | 3.01  | 116.27      | 112.19   |
| 6   | E     | 2   | NAG  | C1-O5-C5 | 2.99  | 116.24      | 112.19   |
| 6   | E     | 1   | NAG  | C2-N2-C7 | 2.72  | 126.77      | 122.90   |

Continued on next page...

Continued from previous page...

| Mol | Chain | Res | Type | Atoms    | Z    | Observed(°) | Ideal(°) |
|-----|-------|-----|------|----------|------|-------------|----------|
| 6   | D     | 1   | NAG  | C2-N2-C7 | 2.69 | 126.73      | 122.90   |
| 6   | F     | 1   | NAG  | C2-N2-C7 | 2.68 | 126.72      | 122.90   |
| 7   | J     | 1   | NAG  | C3-C4-C5 | 2.26 | 114.28      | 110.24   |
| 6   | D     | 2   | NAG  | C3-C4-C5 | 2.24 | 114.23      | 110.24   |
| 6   | E     | 1   | NAG  | O4-C4-C5 | 2.23 | 114.85      | 109.30   |
| 6   | F     | 1   | NAG  | O4-C4-C5 | 2.23 | 114.83      | 109.30   |
| 6   | D     | 1   | NAG  | O4-C4-C5 | 2.23 | 114.83      | 109.30   |
| 6   | E     | 2   | NAG  | C3-C4-C5 | 2.20 | 114.17      | 110.24   |
| 6   | F     | 2   | NAG  | C3-C4-C5 | 2.20 | 114.17      | 110.24   |
| 7   | I     | 1   | NAG  | C1-O5-C5 | 2.12 | 115.07      | 112.19   |
| 7   | K     | 1   | NAG  | C1-C2-N2 | 2.06 | 114.00      | 110.49   |
| 7   | M     | 1   | NAG  | C1-O5-C5 | 2.02 | 114.92      | 112.19   |

There are no chirality outliers.

All (65) torsion outliers are listed below:

| Mol | Chain | Res | Type | Atoms       |
|-----|-------|-----|------|-------------|
| 6   | D     | 1   | NAG  | C8-C7-N2-C2 |
| 6   | D     | 1   | NAG  | O7-C7-N2-C2 |
| 6   | D     | 2   | NAG  | C8-C7-N2-C2 |
| 6   | D     | 2   | NAG  | O7-C7-N2-C2 |
| 6   | E     | 1   | NAG  | C8-C7-N2-C2 |
| 6   | E     | 1   | NAG  | O7-C7-N2-C2 |
| 6   | E     | 2   | NAG  | C8-C7-N2-C2 |
| 6   | E     | 2   | NAG  | O7-C7-N2-C2 |
| 6   | F     | 1   | NAG  | C8-C7-N2-C2 |
| 6   | F     | 1   | NAG  | O7-C7-N2-C2 |
| 6   | F     | 2   | NAG  | C8-C7-N2-C2 |
| 6   | F     | 2   | NAG  | O7-C7-N2-C2 |
| 7   | M     | 2   | NAG  | C4-C5-C6-O6 |
| 7   | M     | 1   | NAG  | O5-C5-C6-O6 |
| 7   | M     | 2   | NAG  | O5-C5-C6-O6 |
| 7   | J     | 1   | NAG  | O5-C5-C6-O6 |
| 7   | J     | 2   | NAG  | O5-C5-C6-O6 |
| 7   | R     | 1   | NAG  | O5-C5-C6-O6 |
| 7   | M     | 1   | NAG  | C4-C5-C6-O6 |
| 7   | G     | 2   | NAG  | O5-C5-C6-O6 |
| 7   | T     | 1   | NAG  | O5-C5-C6-O6 |
| 7   | K     | 2   | NAG  | O5-C5-C6-O6 |
| 7   | J     | 1   | NAG  | C4-C5-C6-O6 |
| 7   | J     | 2   | NAG  | C4-C5-C6-O6 |
| 7   | T     | 1   | NAG  | C4-C5-C6-O6 |

Continued on next page...



Continued from previous page...

| Mol | Chain | Res | Type | Atoms       |
|-----|-------|-----|------|-------------|
| 7   | G     | 2   | NAG  | C8-C7-N2-C2 |
| 7   | G     | 2   | NAG  | O7-C7-N2-C2 |
| 7   | K     | 1   | NAG  | C8-C7-N2-C2 |
| 7   | K     | 1   | NAG  | O7-C7-N2-C2 |
| 7   | K     | 2   | NAG  | C8-C7-N2-C2 |
| 7   | K     | 2   | NAG  | O7-C7-N2-C2 |
| 7   | K     | 2   | NAG  | C4-C5-C6-O6 |
| 7   | R     | 1   | NAG  | C4-C5-C6-O6 |
| 6   | E     | 2   | NAG  | O5-C5-C6-O6 |
| 6   | F     | 2   | NAG  | O5-C5-C6-O6 |
| 6   | D     | 2   | NAG  | O5-C5-C6-O6 |
| 7   | N     | 2   | NAG  | O5-C5-C6-O6 |
| 7   | N     | 2   | NAG  | C4-C5-C6-O6 |
| 6   | D     | 2   | NAG  | C1-C2-N2-C7 |
| 6   | E     | 2   | NAG  | C1-C2-N2-C7 |
| 6   | F     | 2   | NAG  | C1-C2-N2-C7 |
| 7   | T     | 2   | NAG  | O5-C5-C6-O6 |
| 7   | H     | 2   | NAG  | O5-C5-C6-O6 |
| 7   | G     | 2   | NAG  | C4-C5-C6-O6 |
| 6   | D     | 1   | NAG  | C3-C2-N2-C7 |
| 6   | E     | 1   | NAG  | C3-C2-N2-C7 |
| 6   | F     | 1   | NAG  | C3-C2-N2-C7 |
| 7   | N     | 1   | NAG  | C4-C5-C6-O6 |
| 7   | J     | 1   | NAG  | C1-C2-N2-C7 |
| 7   | R     | 2   | NAG  | C4-C5-C6-O6 |
| 7   | N     | 1   | NAG  | O5-C5-C6-O6 |
| 6   | D     | 2   | NAG  | C3-C2-N2-C7 |
| 6   | E     | 2   | NAG  | C3-C2-N2-C7 |
| 6   | F     | 2   | NAG  | C3-C2-N2-C7 |
| 7   | M     | 2   | NAG  | C3-C2-N2-C7 |
| 6   | D     | 2   | NAG  | C4-C5-C6-O6 |
| 6   | E     | 2   | NAG  | C4-C5-C6-O6 |
| 6   | F     | 2   | NAG  | C4-C5-C6-O6 |
| 7   | L     | 1   | NAG  | C1-C2-N2-C7 |
| 7   | R     | 2   | NAG  | O5-C5-C6-O6 |
| 7   | K     | 1   | NAG  | C4-C5-C6-O6 |
| 7   | G     | 2   | NAG  | C3-C2-N2-C7 |
| 7   | K     | 1   | NAG  | C3-C2-N2-C7 |
| 7   | K     | 2   | NAG  | C3-C2-N2-C7 |
| 7   | I     | 2   | NAG  | C4-C5-C6-O6 |

There are no ring outliers.

13 monomers are involved in 9 short contacts:

| Mol | Chain | Res | Type | Clashes | Symm-Clashes |
|-----|-------|-----|------|---------|--------------|
| 6   | F     | 2   | NAG  | 1       | 0            |
| 6   | D     | 1   | NAG  | 1       | 0            |
| 6   | E     | 2   | NAG  | 1       | 0            |
| 6   | D     | 2   | NAG  | 1       | 0            |
| 7   | L     | 1   | NAG  | 1       | 0            |
| 7   | M     | 1   | NAG  | 1       | 0            |
| 6   | E     | 1   | NAG  | 1       | 0            |
| 7   | M     | 2   | NAG  | 2       | 0            |
| 7   | K     | 2   | NAG  | 1       | 0            |
| 6   | F     | 1   | NAG  | 1       | 0            |
| 7   | L     | 2   | NAG  | 1       | 0            |
| 7   | K     | 1   | NAG  | 1       | 0            |
| 7   | G     | 2   | NAG  | 1       | 0            |

The following is a two-dimensional graphical depiction of Mogul quality analysis of bond lengths, bond angles, torsion angles, and ring geometry for oligosaccharide.

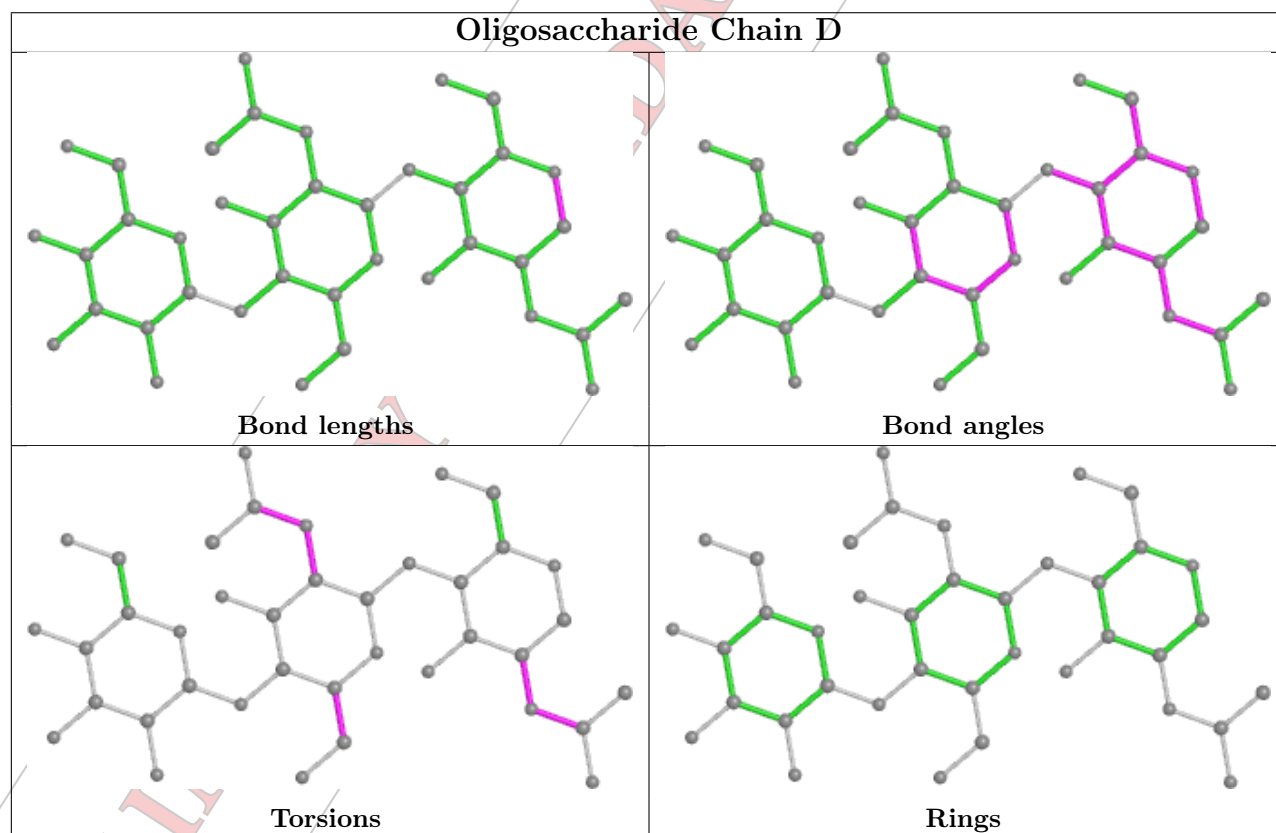

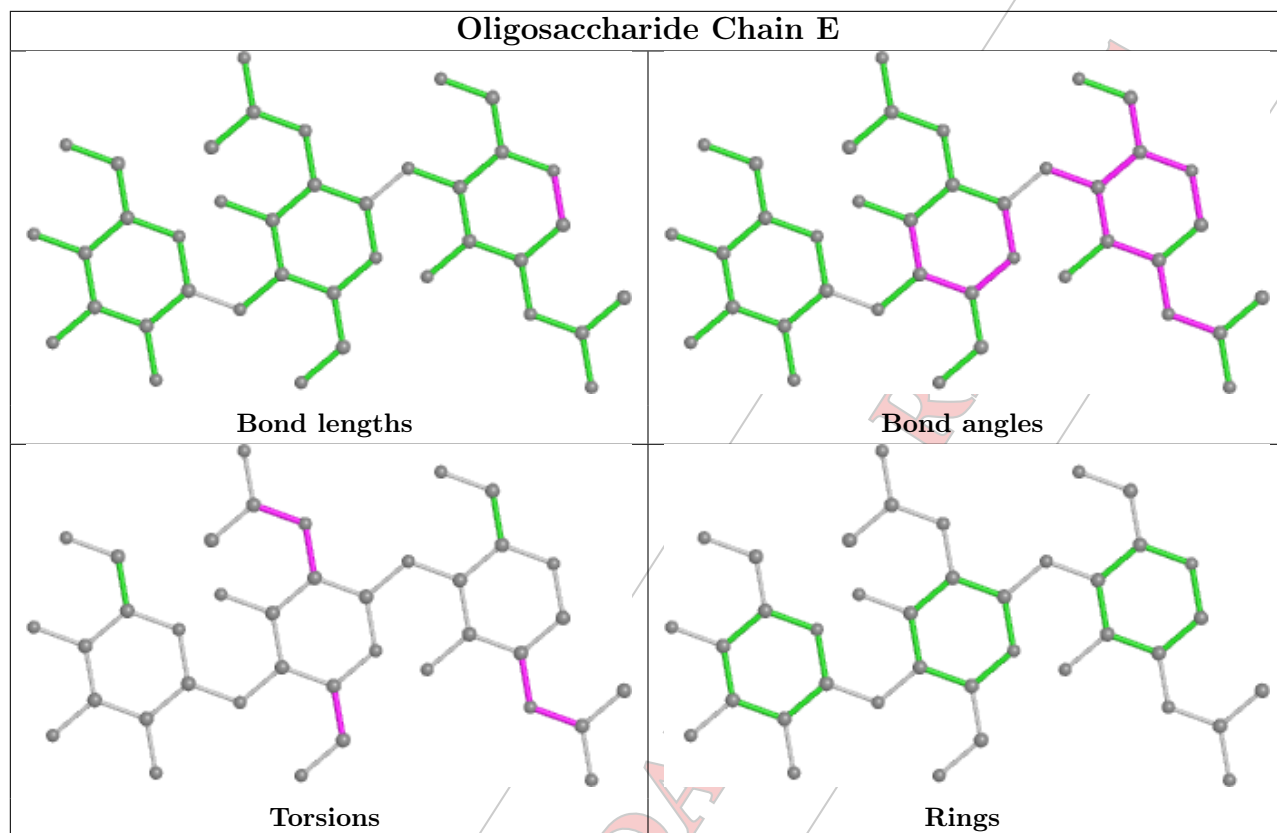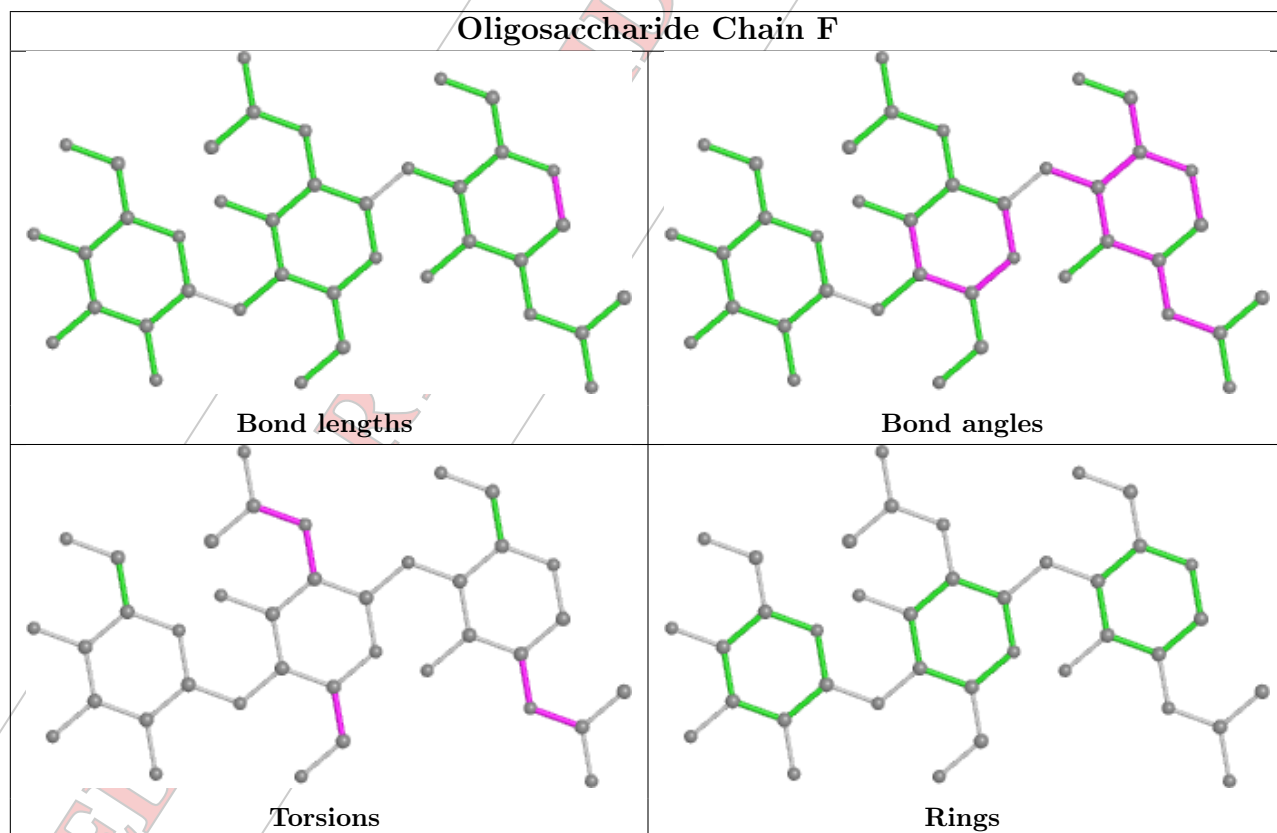

PRELIMINARY

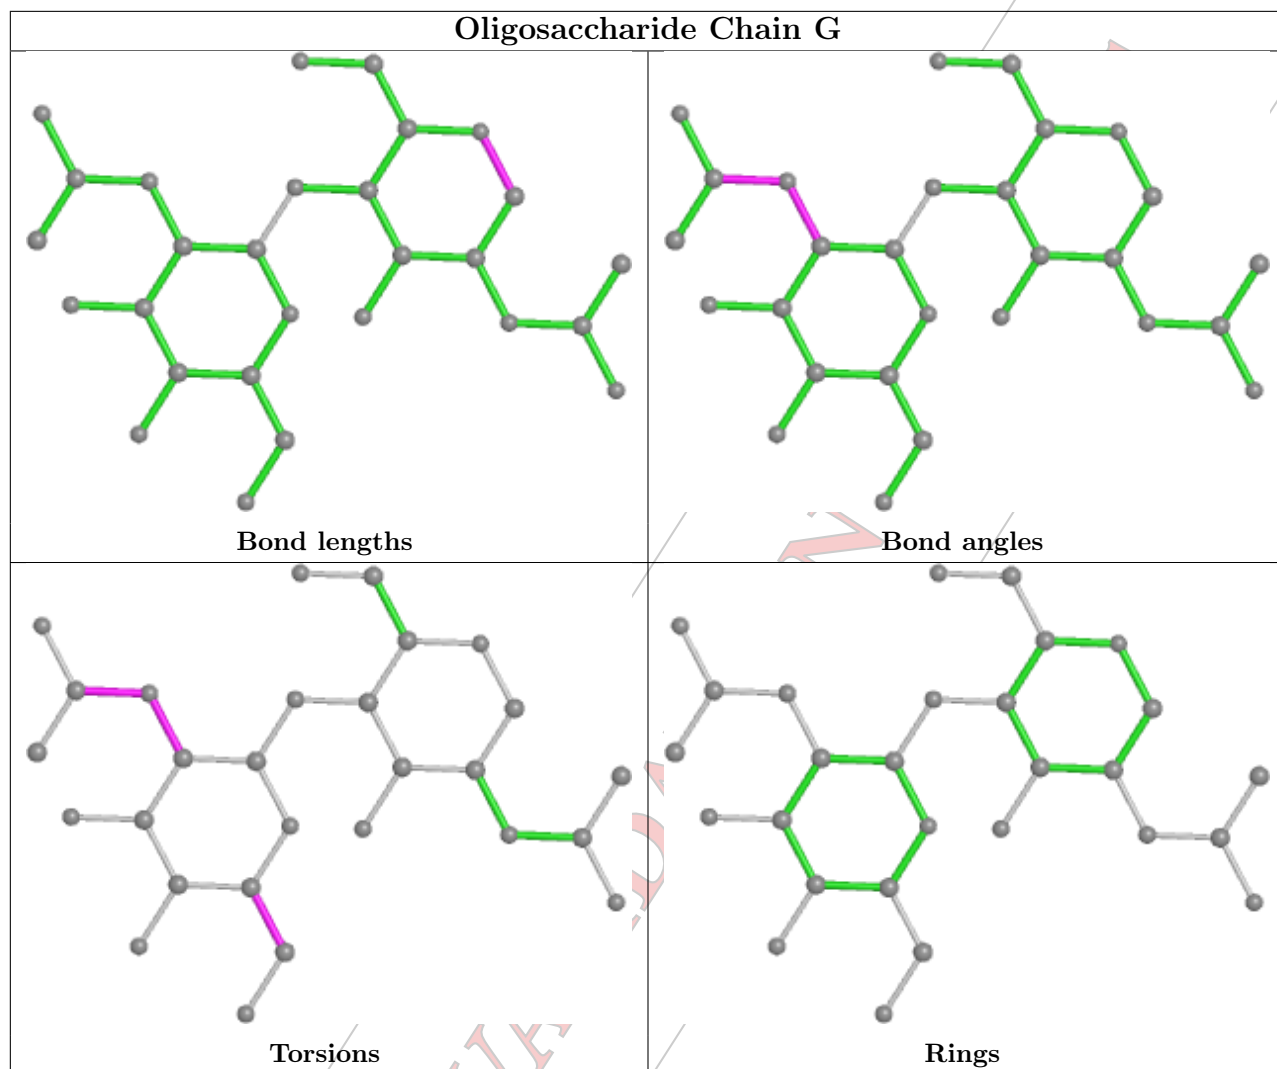

PRELIMINARY

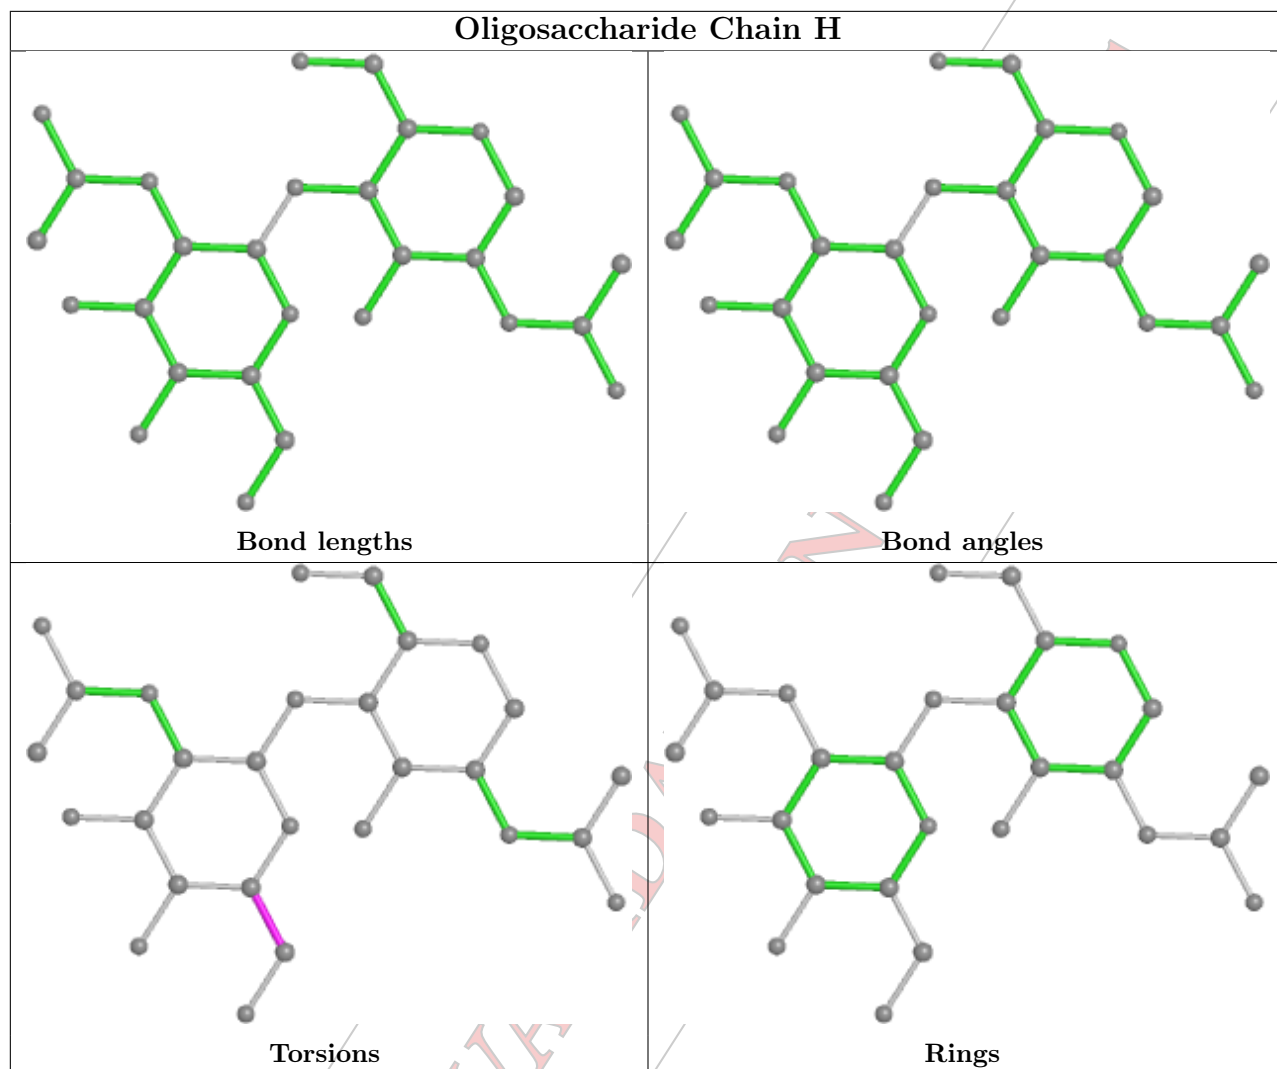

PRELIMINARY

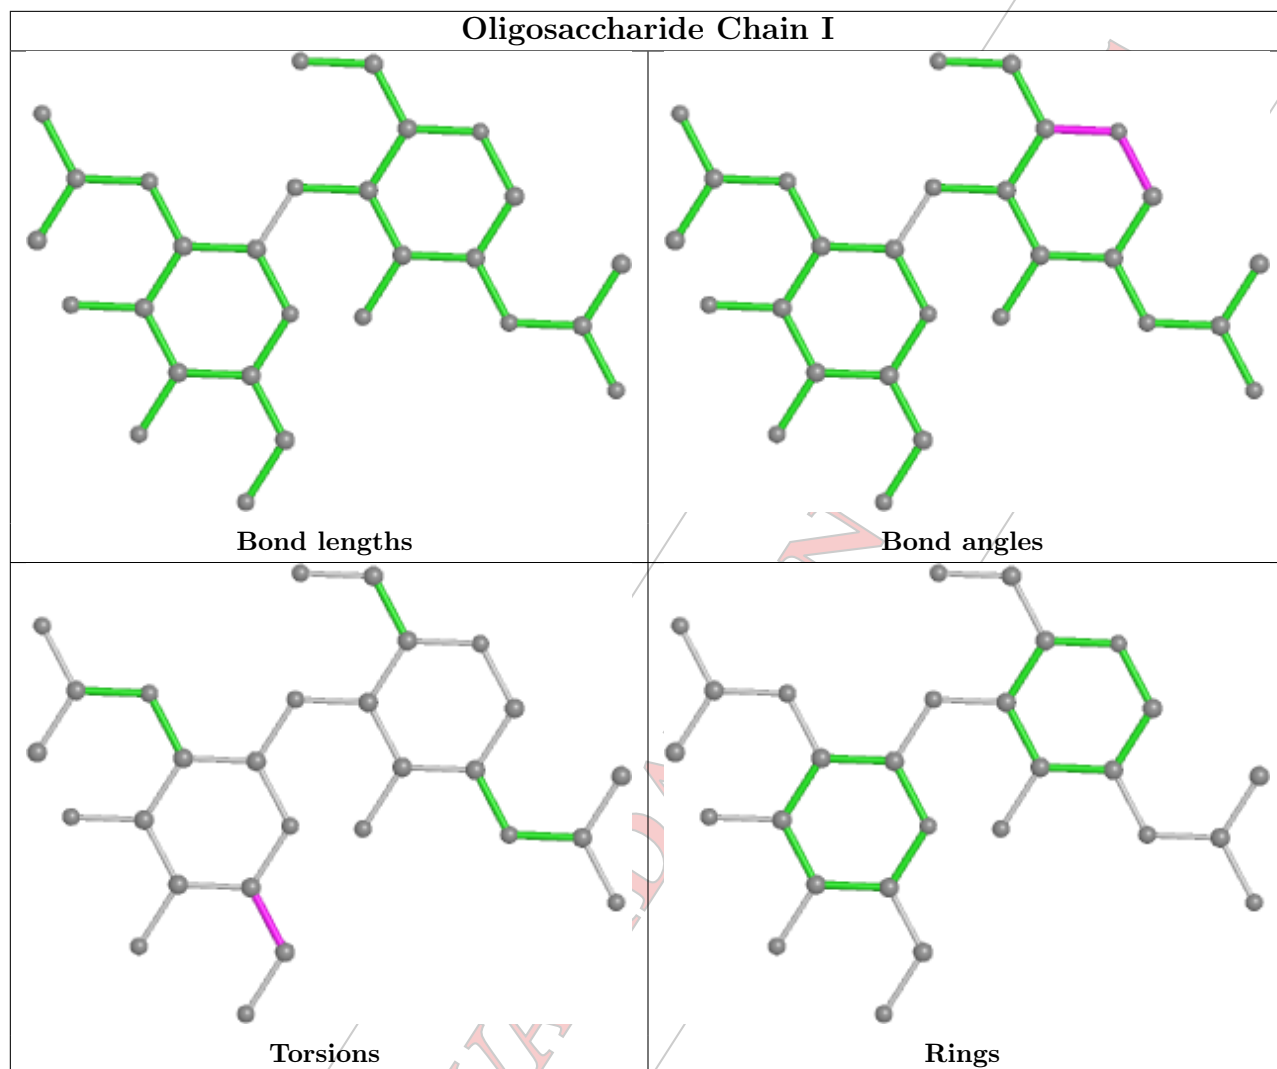

PRELIMINARY



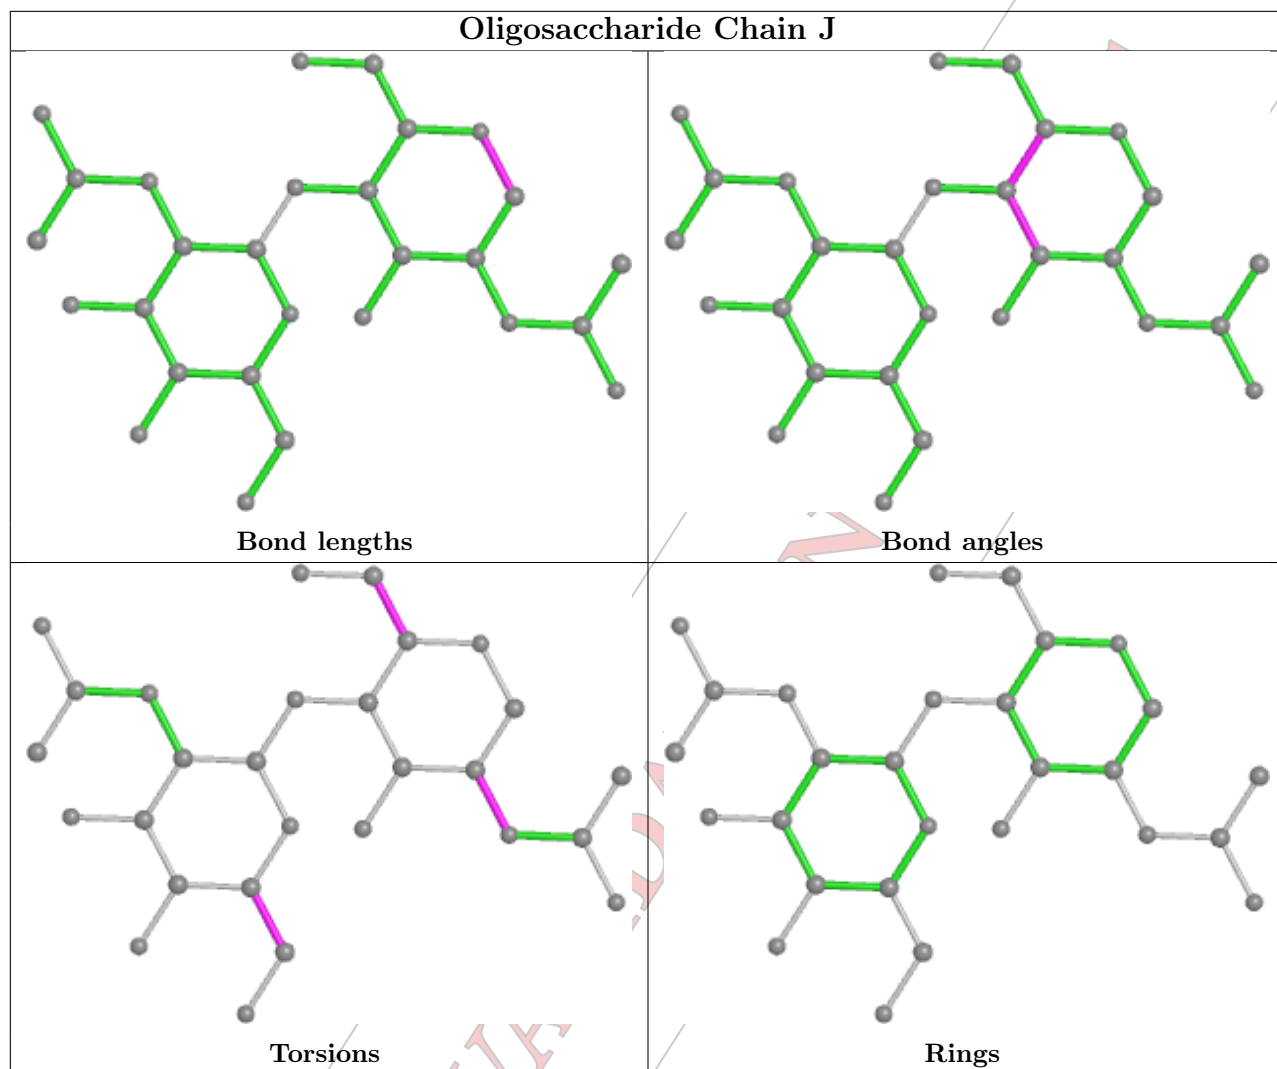

PRELIMINARY

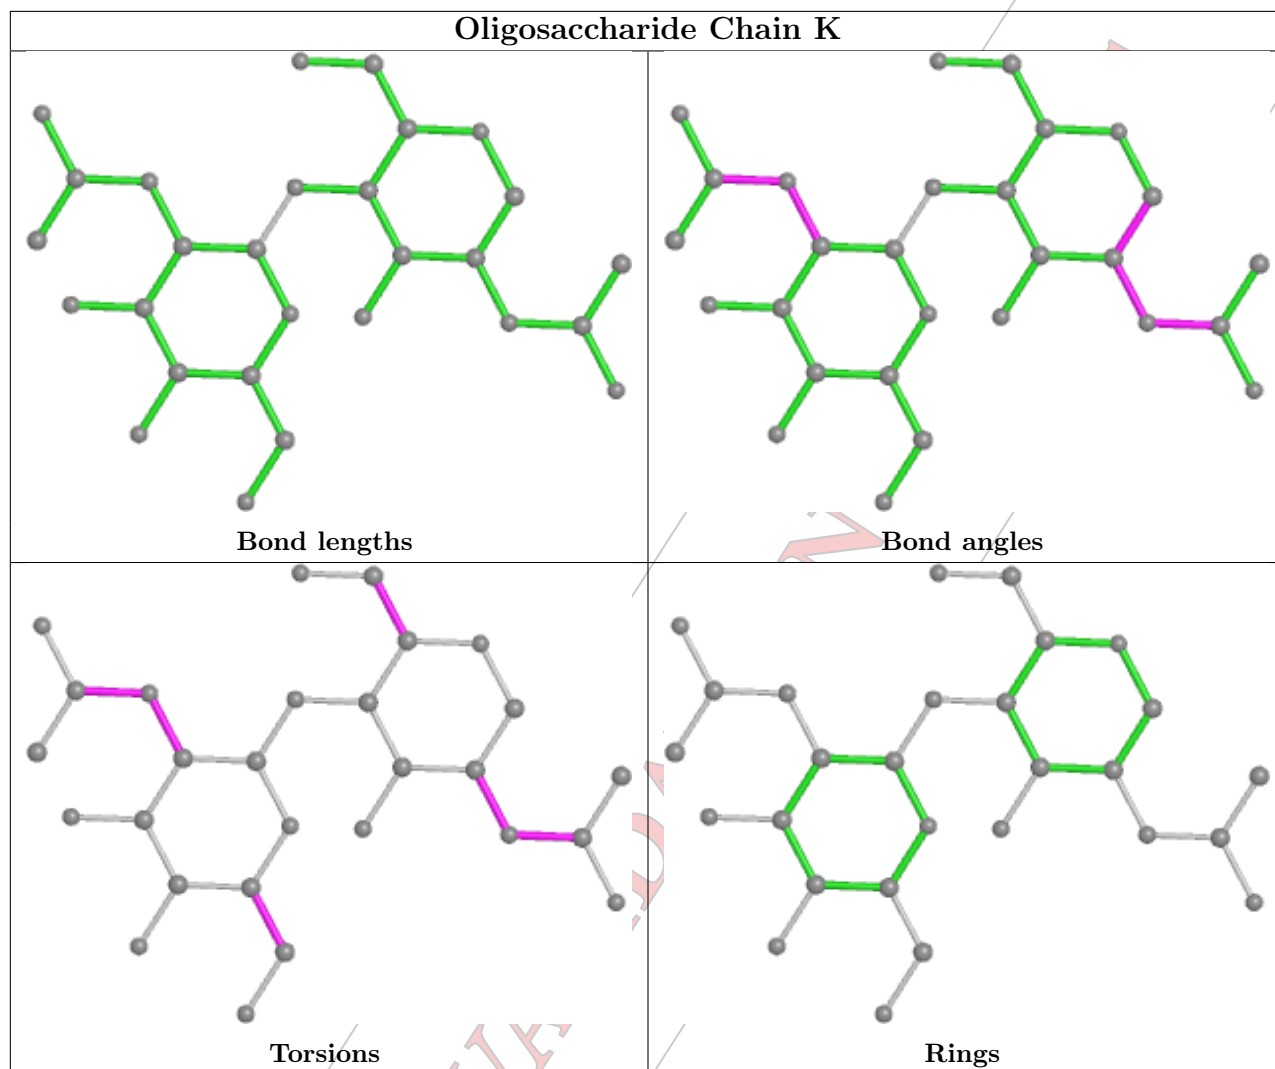

PRELIMINARY

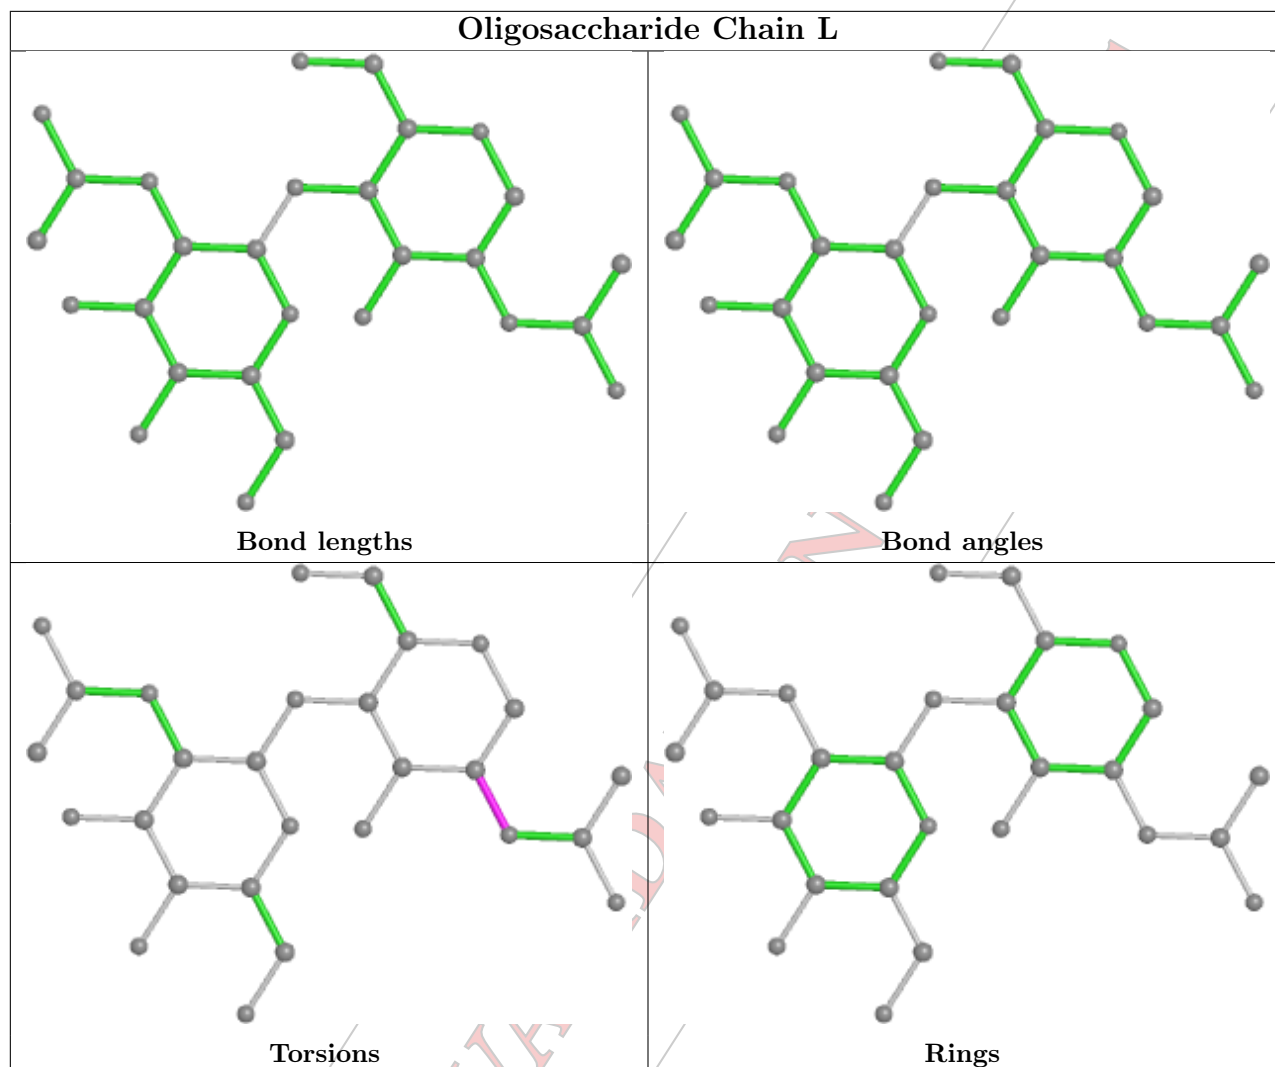

PRELIMINARY

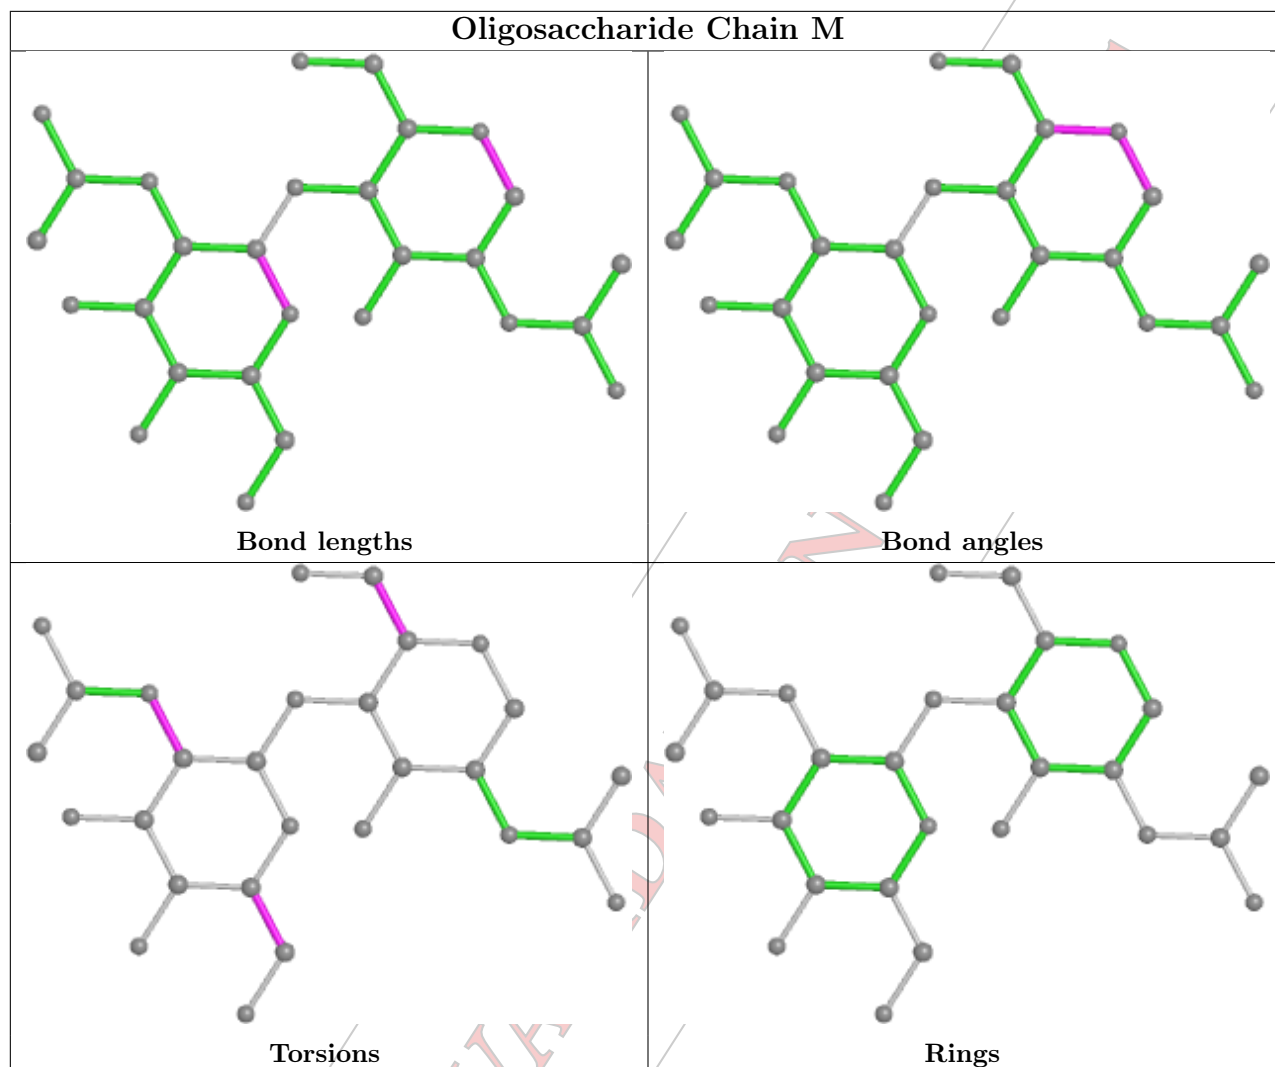

PRELIMINARY

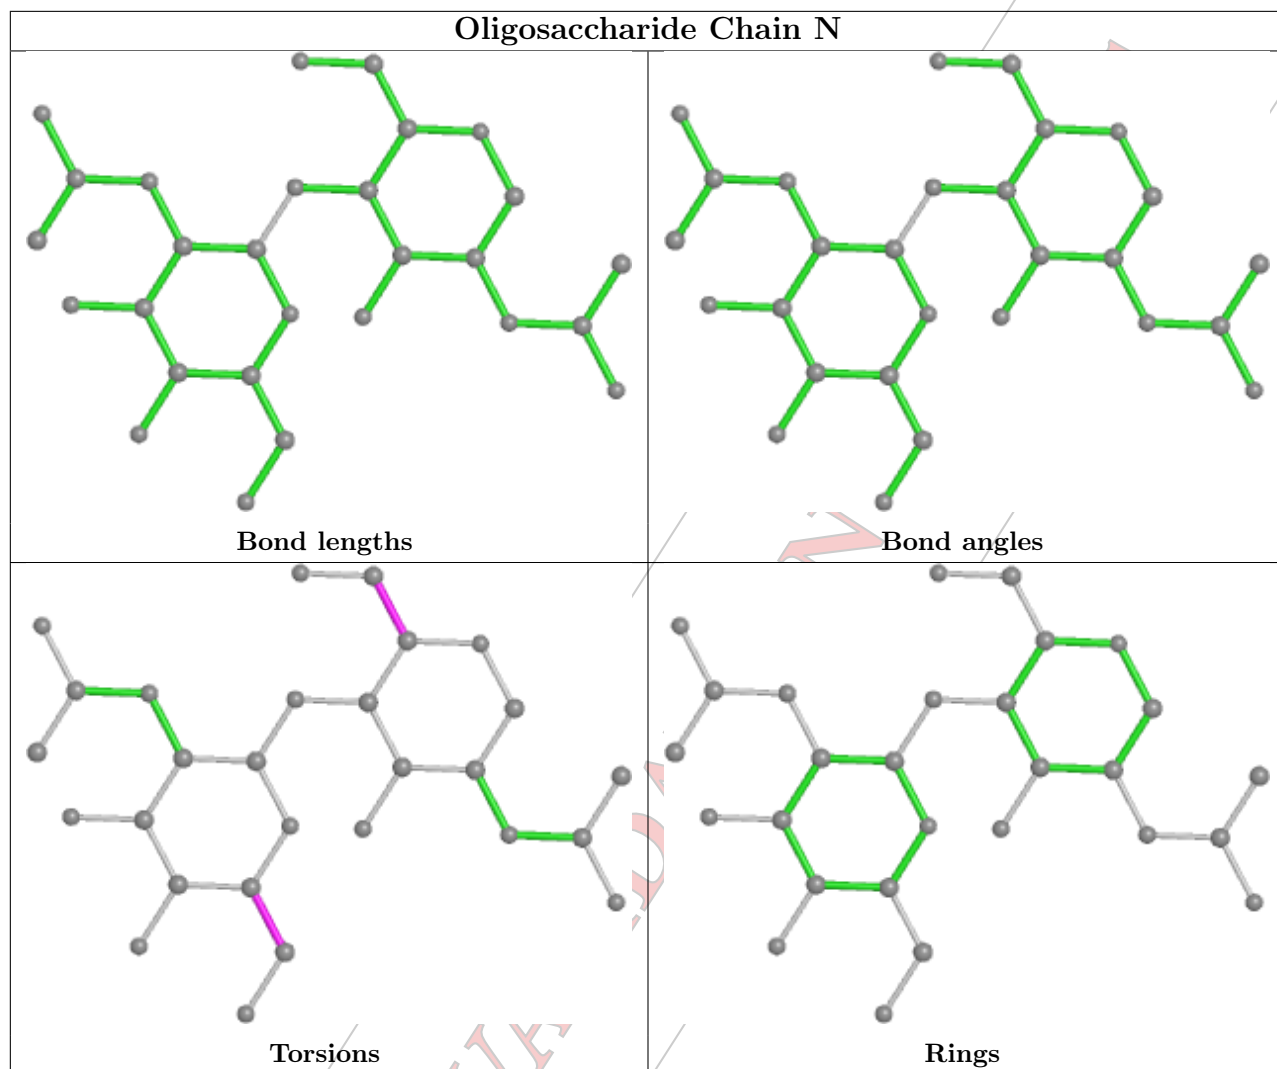

PRELIMINARY

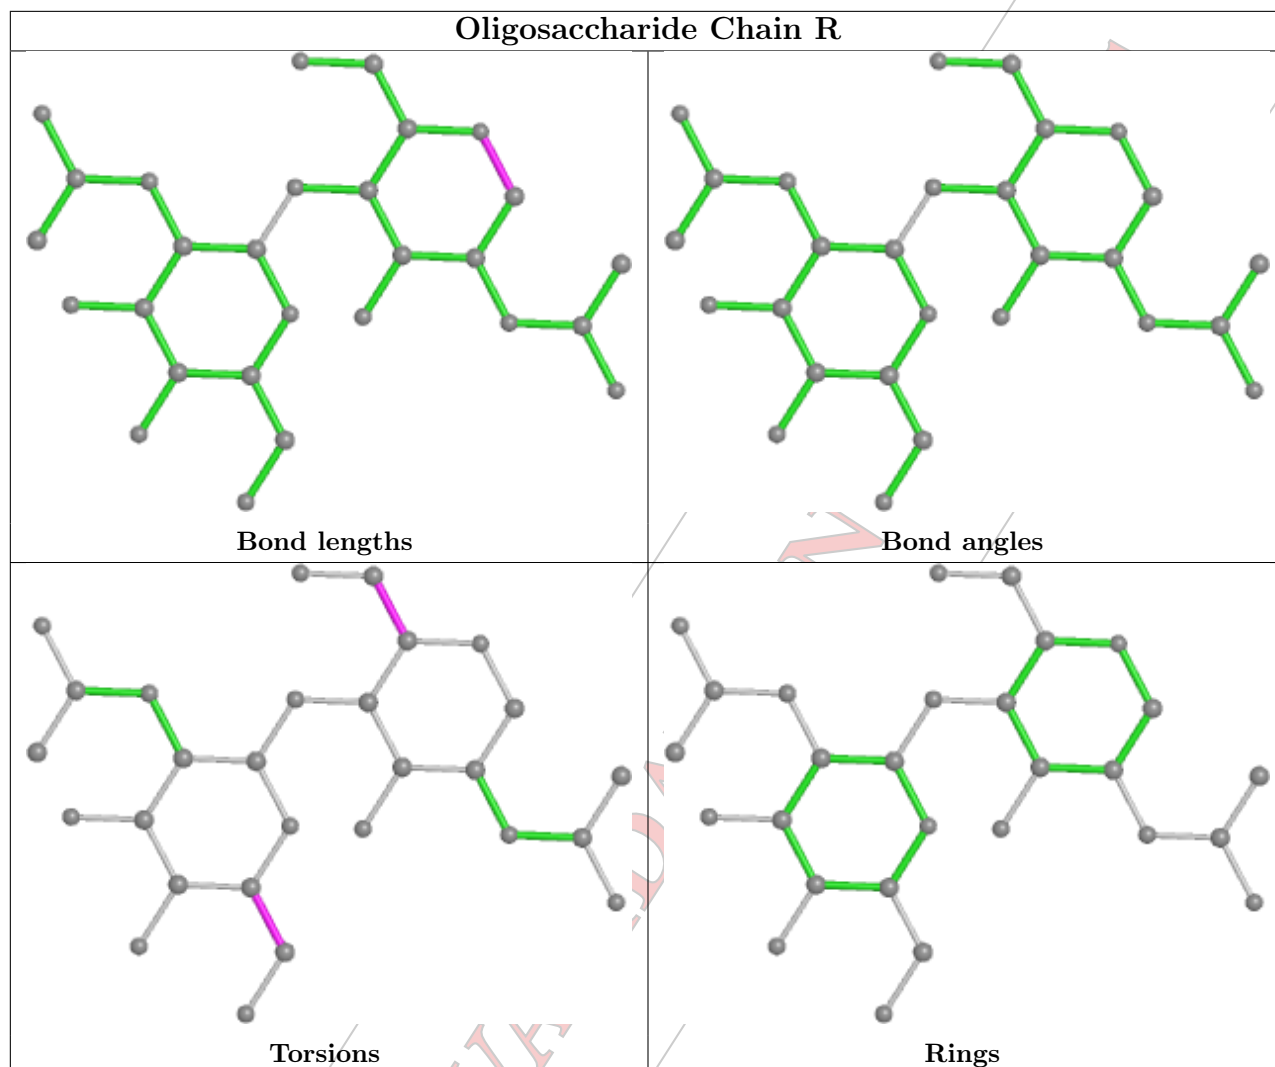

PRELIMINARY



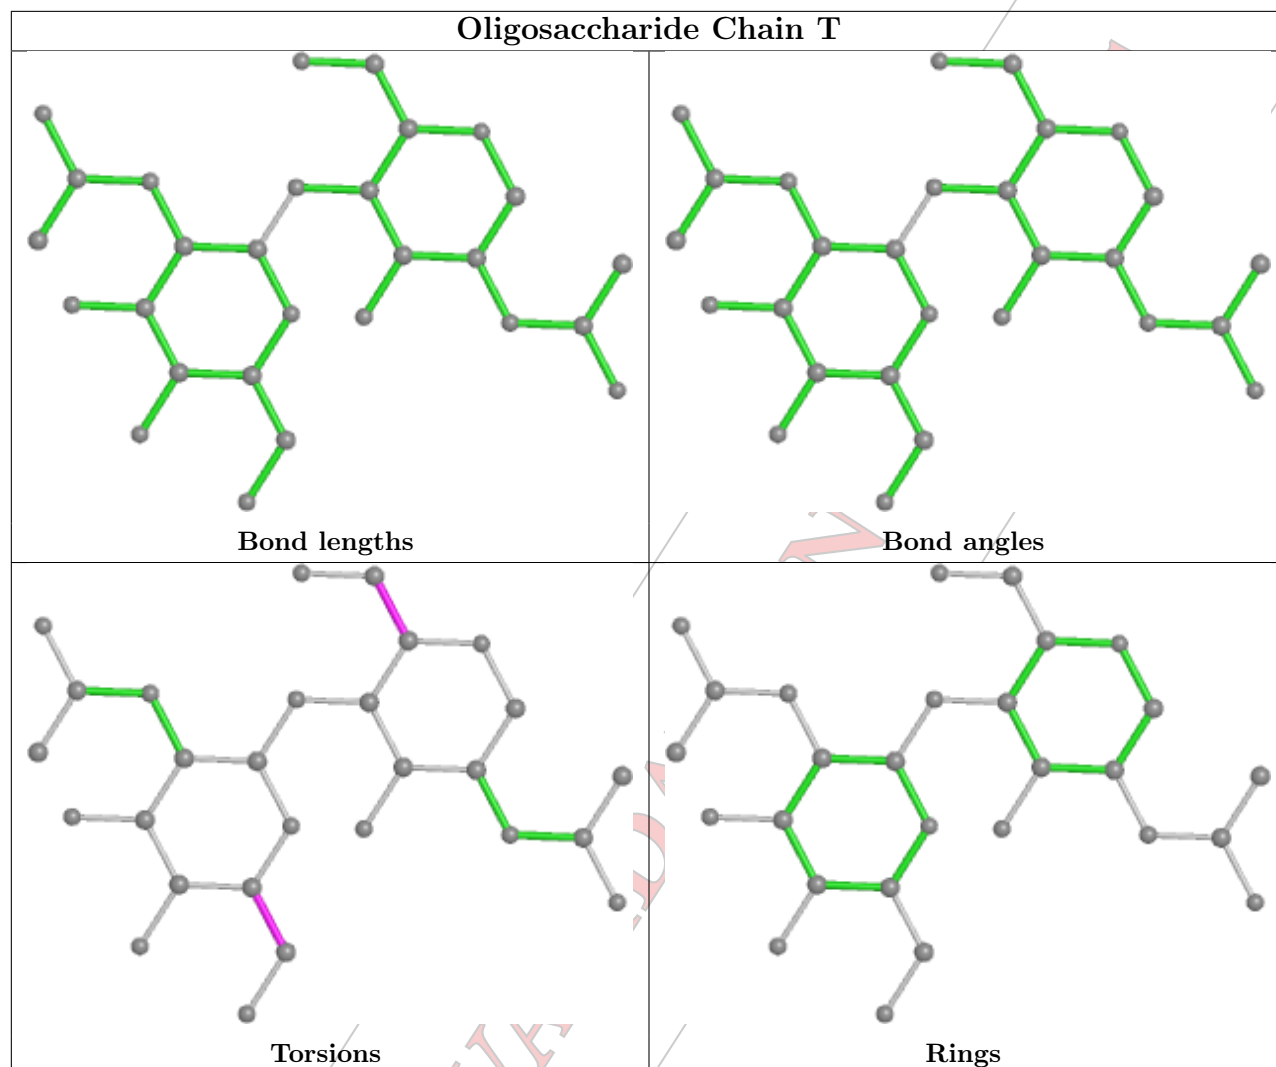

## 5.6 Ligand geometry [i](#)

26 ligands are modelled in this entry.

In the following table, the Counts columns list the number of bonds (or angles) for which Mogul statistics could be retrieved, the number of bonds (or angles) that are observed in the model and the number of bonds (or angles) that are defined in the Chemical Component Dictionary. The Link column lists molecule types, if any, to which the group is linked. The Z score for a bond length (or angle) is the number of standard deviations the observed value is removed from the expected value. A bond length (or angle) with  $|Z| > 2$  is considered an outlier worth inspection. RMSZ is the root-mean-square of all Z scores of the bond lengths (or angles).

| Mol | Type | Chain | Res  | Link | Bond lengths |      |             | Bond angles |      |             |
|-----|------|-------|------|------|--------------|------|-------------|-------------|------|-------------|
|     |      |       |      |      | Counts       | RMSZ | $\# Z  > 2$ | Counts      | RMSZ | $\# Z  > 2$ |
| 8   | NAG  | A     | 1304 | 1    | 14,14,15     | 0.34 | 0           | 17,19,21    | 0.57 | 0           |
| 8   | NAG  | B     | 1302 | 2    | 14,14,15     | 0.27 | 0           | 17,19,21    | 0.54 | 0           |
| 8   | NAG  | B     | 1303 | 2    | 14,14,15     | 0.19 | 0           | 17,19,21    | 0.51 | 0           |
| 8   | NAG  | C     | 1308 | 3    | 14,14,15     | 0.26 | 0           | 17,19,21    | 0.43 | 0           |

| Mol | Type | Chain | Res  | Link | Bond lengths |      |          | Bond angles |      |          |
|-----|------|-------|------|------|--------------|------|----------|-------------|------|----------|
|     |      |       |      |      | Counts       | RMSZ | # Z  > 2 | Counts      | RMSZ | # Z  > 2 |
| 8   | NAG  | C     | 1306 | 3    | 14,14,15     | 0.18 | 0        | 17,19,21    | 0.47 | 0        |
| 8   | NAG  | B     | 1307 | 2    | 14,14,15     | 0.24 | 0        | 17,19,21    | 0.42 | 0        |
| 8   | NAG  | B     | 1304 | 2    | 14,14,15     | 0.33 | 0        | 17,19,21    | 0.54 | 0        |
| 8   | NAG  | C     | 1307 | 3    | 14,14,15     | 0.39 | 0        | 17,19,21    | 0.38 | 0        |
| 8   | NAG  | C     | 1302 | 3    | 14,14,15     | 0.19 | 0        | 17,19,21    | 0.45 | 0        |
| 8   | NAG  | C     | 1304 | 3    | 14,14,15     | 0.19 | 0        | 17,19,21    | 0.43 | 0        |
| 8   | NAG  | C     | 1305 | 3    | 14,14,15     | 0.21 | 0        | 17,19,21    | 0.42 | 0        |
| 8   | NAG  | B     | 1309 | 2    | 14,14,15     | 0.38 | 0        | 17,19,21    | 0.41 | 0        |
| 8   | NAG  | A     | 1305 | 1    | 14,14,15     | 0.26 | 0        | 17,19,21    | 0.48 | 0        |
| 8   | NAG  | B     | 1310 | 2    | 14,14,15     | 0.32 | 0        | 17,19,21    | 0.70 | 1 (5%)   |
| 8   | NAG  | A     | 1302 | 1    | 14,14,15     | 0.51 | 0        | 17,19,21    | 0.62 | 0        |
| 8   | NAG  | B     | 1306 | 2    | 14,14,15     | 0.21 | 0        | 17,19,21    | 0.49 | 0        |
| 8   | NAG  | B     | 1312 | 2    | 14,14,15     | 0.19 | 0        | 17,19,21    | 0.71 | 1 (5%)   |
| 8   | NAG  | C     | 1309 | 3    | 14,14,15     | 0.15 | 0        | 17,19,21    | 0.57 | 0        |
| 8   | NAG  | A     | 1307 | 1    | 14,14,15     | 0.22 | 0        | 17,19,21    | 0.56 | 0        |
| 8   | NAG  | C     | 1301 | 3    | 14,14,15     | 0.22 | 0        | 17,19,21    | 0.42 | 0        |
| 8   | NAG  | A     | 1306 | 1    | 14,14,15     | 0.34 | 0        | 17,19,21    | 1.27 | 1 (5%)   |
| 8   | NAG  | A     | 1303 | 1    | 14,14,15     | 0.23 | 0        | 17,19,21    | 0.44 | 0        |
| 8   | NAG  | B     | 1308 | 2    | 14,14,15     | 0.18 | 0        | 17,19,21    | 0.49 | 0        |
| 8   | NAG  | A     | 1301 | 1    | 14,14,15     | 0.31 | 0        | 17,19,21    | 0.43 | 0        |
| 8   | NAG  | B     | 1311 | 2    | 14,14,15     | 0.31 | 0        | 17,19,21    | 0.39 | 0        |
| 8   | NAG  | B     | 1301 | 2    | 14,14,15     | 0.25 | 0        | 17,19,21    | 0.53 | 0        |

In the following table, the Chirals column lists the number of chiral outliers, the number of chiral centers analysed, the number of these observed in the model and the number defined in the Chemical Component Dictionary. Similar counts are reported in the Torsion and Rings columns. '-' means no outliers of that kind were identified.

| Mol | Type | Chain | Res  | Link | Chirals | Torsions  | Rings   |
|-----|------|-------|------|------|---------|-----------|---------|
| 8   | NAG  | A     | 1304 | 1    | -       | 4/6/23/26 | 0/1/1/1 |
| 8   | NAG  | B     | 1302 | 2    | -       | 3/6/23/26 | 0/1/1/1 |
| 8   | NAG  | B     | 1303 | 2    | -       | 4/6/23/26 | 0/1/1/1 |
| 8   | NAG  | C     | 1308 | 3    | -       | 0/6/23/26 | 0/1/1/1 |
| 8   | NAG  | C     | 1306 | 3    | -       | 2/6/23/26 | 0/1/1/1 |
| 8   | NAG  | B     | 1307 | 2    | -       | 0/6/23/26 | 0/1/1/1 |
| 8   | NAG  | B     | 1304 | 2    | -       | 3/6/23/26 | 0/1/1/1 |
| 8   | NAG  | C     | 1307 | 3    | -       | 2/6/23/26 | 0/1/1/1 |
| 8   | NAG  | C     | 1302 | 3    | -       | 4/6/23/26 | 0/1/1/1 |
| 8   | NAG  | C     | 1304 | 3    | -       | 2/6/23/26 | 0/1/1/1 |
| 8   | NAG  | C     | 1305 | 3    | -       | 0/6/23/26 | 0/1/1/1 |

Continued on next page...

Continued from previous page...

| Mol | Type | Chain | Res  | Link | Chirals | Torsions  | Rings   |
|-----|------|-------|------|------|---------|-----------|---------|
| 8   | NAG  | B     | 1309 | 2    | -       | 2/6/23/26 | 0/1/1/1 |
| 8   | NAG  | A     | 1305 | 1    | -       | 2/6/23/26 | 0/1/1/1 |
| 8   | NAG  | B     | 1310 | 2    | -       | 1/6/23/26 | 0/1/1/1 |
| 8   | NAG  | A     | 1302 | 1    | -       | 3/6/23/26 | 0/1/1/1 |
| 8   | NAG  | B     | 1306 | 2    | -       | 3/6/23/26 | 0/1/1/1 |
| 8   | NAG  | B     | 1312 | 2    | -       | 2/6/23/26 | 0/1/1/1 |
| 8   | NAG  | C     | 1309 | 3    | -       | 2/6/23/26 | 0/1/1/1 |
| 8   | NAG  | A     | 1307 | 1    | -       | 2/6/23/26 | 0/1/1/1 |
| 8   | NAG  | C     | 1301 | 3    | -       | 2/6/23/26 | 0/1/1/1 |
| 8   | NAG  | A     | 1306 | 1    | -       | 3/6/23/26 | 0/1/1/1 |
| 8   | NAG  | A     | 1303 | 1    | -       | 4/6/23/26 | 0/1/1/1 |
| 8   | NAG  | B     | 1308 | 2    | -       | 2/6/23/26 | 0/1/1/1 |
| 8   | NAG  | A     | 1301 | 1    | -       | 3/6/23/26 | 0/1/1/1 |
| 8   | NAG  | B     | 1311 | 2    | -       | 2/6/23/26 | 0/1/1/1 |
| 8   | NAG  | B     | 1301 | 2    | -       | 4/6/23/26 | 0/1/1/1 |

There are no bond length outliers.

All (3) bond angle outliers are listed below:

| Mol | Chain | Res  | Type | Atoms    | Z    | Observed(°) | Ideal(°) |
|-----|-------|------|------|----------|------|-------------|----------|
| 8   | A     | 1306 | NAG  | C2-N2-C7 | 4.31 | 129.04      | 122.90   |
| 8   | B     | 1312 | NAG  | C1-O5-C5 | 2.58 | 115.69      | 112.19   |
| 8   | B     | 1310 | NAG  | C1-O5-C5 | 2.39 | 115.43      | 112.19   |

There are no chirality outliers.

All (61) torsion outliers are listed below:

| Mol | Chain | Res  | Type | Atoms       |
|-----|-------|------|------|-------------|
| 8   | B     | 1304 | NAG  | C4-C5-C6-O6 |
| 8   | C     | 1301 | NAG  | C4-C5-C6-O6 |
| 8   | C     | 1306 | NAG  | C4-C5-C6-O6 |
| 8   | A     | 1301 | NAG  | O5-C5-C6-O6 |
| 8   | A     | 1303 | NAG  | O5-C5-C6-O6 |
| 8   | A     | 1305 | NAG  | O5-C5-C6-O6 |
| 8   | C     | 1306 | NAG  | O5-C5-C6-O6 |
| 8   | B     | 1304 | NAG  | O5-C5-C6-O6 |
| 8   | C     | 1301 | NAG  | O5-C5-C6-O6 |
| 8   | A     | 1307 | NAG  | C4-C5-C6-O6 |

Continued on next page...

*Continued from previous page...*

| Mol | Chain | Res  | Type | Atoms       |
|-----|-------|------|------|-------------|
| 8   | B     | 1302 | NAG  | C4-C5-C6-O6 |
| 8   | B     | 1306 | NAG  | O5-C5-C6-O6 |
| 8   | B     | 1312 | NAG  | O5-C5-C6-O6 |
| 8   | A     | 1304 | NAG  | O5-C5-C6-O6 |
| 8   | A     | 1301 | NAG  | C4-C5-C6-O6 |
| 8   | B     | 1301 | NAG  | O5-C5-C6-O6 |
| 8   | B     | 1303 | NAG  | O5-C5-C6-O6 |
| 8   | C     | 1309 | NAG  | O5-C5-C6-O6 |
| 8   | A     | 1304 | NAG  | C4-C5-C6-O6 |
| 8   | A     | 1302 | NAG  | C4-C5-C6-O6 |
| 8   | A     | 1307 | NAG  | O5-C5-C6-O6 |
| 8   | B     | 1311 | NAG  | O5-C5-C6-O6 |
| 8   | B     | 1301 | NAG  | C4-C5-C6-O6 |
| 8   | C     | 1309 | NAG  | C4-C5-C6-O6 |
| 8   | A     | 1303 | NAG  | C4-C5-C6-O6 |
| 8   | A     | 1305 | NAG  | C4-C5-C6-O6 |
| 8   | C     | 1307 | NAG  | C4-C5-C6-O6 |
| 8   | B     | 1303 | NAG  | C4-C5-C6-O6 |
| 8   | B     | 1306 | NAG  | C4-C5-C6-O6 |
| 8   | B     | 1312 | NAG  | C4-C5-C6-O6 |
| 8   | A     | 1303 | NAG  | C8-C7-N2-C2 |
| 8   | A     | 1303 | NAG  | O7-C7-N2-C2 |
| 8   | A     | 1304 | NAG  | C8-C7-N2-C2 |
| 8   | A     | 1304 | NAG  | O7-C7-N2-C2 |
| 8   | A     | 1306 | NAG  | C8-C7-N2-C2 |
| 8   | A     | 1306 | NAG  | O7-C7-N2-C2 |
| 8   | B     | 1301 | NAG  | C8-C7-N2-C2 |
| 8   | B     | 1301 | NAG  | O7-C7-N2-C2 |
| 8   | B     | 1303 | NAG  | C8-C7-N2-C2 |
| 8   | B     | 1303 | NAG  | O7-C7-N2-C2 |
| 8   | C     | 1302 | NAG  | C8-C7-N2-C2 |
| 8   | C     | 1302 | NAG  | O7-C7-N2-C2 |
| 8   | B     | 1302 | NAG  | O5-C5-C6-O6 |
| 8   | C     | 1307 | NAG  | O5-C5-C6-O6 |
| 8   | B     | 1309 | NAG  | O5-C5-C6-O6 |
| 8   | A     | 1302 | NAG  | O5-C5-C6-O6 |
| 8   | C     | 1302 | NAG  | C4-C5-C6-O6 |
| 8   | B     | 1311 | NAG  | C4-C5-C6-O6 |
| 8   | B     | 1310 | NAG  | O5-C5-C6-O6 |
| 8   | C     | 1302 | NAG  | O5-C5-C6-O6 |
| 8   | B     | 1308 | NAG  | C4-C5-C6-O6 |
| 8   | B     | 1304 | NAG  | C1-C2-N2-C7 |

*Continued on next page...*

Continued from previous page...

| Mol | Chain | Res  | Type | Atoms       |
|-----|-------|------|------|-------------|
| 8   | B     | 1308 | NAG  | O5-C5-C6-O6 |
| 8   | B     | 1309 | NAG  | C4-C5-C6-O6 |
| 8   | A     | 1302 | NAG  | C3-C2-N2-C7 |
| 8   | B     | 1302 | NAG  | C3-C2-N2-C7 |
| 8   | B     | 1306 | NAG  | C3-C2-N2-C7 |
| 8   | C     | 1304 | NAG  | C4-C5-C6-O6 |
| 8   | A     | 1301 | NAG  | C1-C2-N2-C7 |
| 8   | C     | 1304 | NAG  | O5-C5-C6-O6 |
| 8   | A     | 1306 | NAG  | C3-C2-N2-C7 |

There are no ring outliers.

4 monomers are involved in 6 short contacts:

| Mol | Chain | Res  | Type | Clashes | Symm-Clashes |
|-----|-------|------|------|---------|--------------|
| 8   | A     | 1302 | NAG  | 2       | 0            |
| 8   | C     | 1301 | NAG  | 2       | 0            |
| 8   | A     | 1306 | NAG  | 1       | 0            |
| 8   | B     | 1301 | NAG  | 1       | 0            |

## 5.7 Other polymers [i](#)

There are no such residues in this entry.

## 5.8 Polymer linkage issues [i](#)

The following chains have linkage breaks:

| Mol | Chain | Number of breaks |
|-----|-------|------------------|
| 3   | C     | 8                |
| 1   | A     | 8                |
| 2   | B     | 8                |

All chain breaks are listed below:

| Model | Chain | Residue-1 | Atom-1 | Residue-2 | Atom-2 | Distance (Å) |
|-------|-------|-----------|--------|-----------|--------|--------------|
| 1     | C     | 241:LEU   | C      | 261:GLY   | N      | 14.44        |
| 1     | A     | 241:LEU   | C      | 261:GLY   | N      | 13.72        |
| 1     | C     | 620:VAL   | C      | 641:ASN   | N      | 12.86        |
| 1     | A     | 620:VAL   | C      | 640:SER   | N      | 12.55        |
| 1     | C     | 176:LEU   | C      | 187:LYS   | N      | 12.05        |

Continued on next page...

Continued from previous page...

| Model | Chain | Residue-1 | Atom-1 | Residue-2 | Atom-2 | Distance (Å) |
|-------|-------|-----------|--------|-----------|--------|--------------|
| 1     | A     | 176:LEU   | C      | 187:LYS   | N      | 11.99        |
| 1     | B     | 176:LEU   | C      | 187:LYS   | N      | 11.91        |
| 1     | A     | 828:LEU   | C      | 853:GLN   | N      | 11.67        |
| 1     | C     | 828:LEU   | C      | 853:GLN   | N      | 10.51        |
| 1     | B     | 620:VAL   | C      | 638:THR   | N      | 9.78         |
| 1     | B     | 241:LEU   | C      | 263:ALA   | N      | 9.47         |
| 1     | B     | 209:PRO   | C      | 217:PRO   | N      | 9.42         |
| 1     | B     | 828:LEU   | C      | 853:GLN   | N      | 9.11         |
| 1     | C     | 95:THR    | C      | 99:ASN    | N      | 8.82         |
| 1     | A     | 95:THR    | C      | 99:ASN    | N      | 7.64         |
| 1     | B     | 66:HIS    | C      | 81:ASN    | N      | 7.50         |
| 1     | A     | 142:GLY   | C      | 156:GLU   | N      | 7.26         |
| 1     | C     | 66:HIS    | C      | 81:ASN    | N      | 6.61         |
| 1     | C     | 140:PHE   | C      | 157:PHE   | N      | 6.54         |
| 1     | A     | 66:HIS    | C      | 79:PHE    | N      | 6.04         |
| 1     | B     | 672:ALA   | C      | 687:VAL   | N      | 5.40         |
| 1     | A     | 672:ALA   | C      | 687:VAL   | N      | 5.33         |
| 1     | C     | 672:ALA   | C      | 687:VAL   | N      | 5.14         |
| 1     | B     | 141:LEU   | C      | 155:SER   | N      | 4.86         |

PRELIMINARY VALIDATION REPORT



## 6 Map visualisation [i](#)

This section contains visualisations of the EMDB entry D\_1300026375. These allow visual inspection of the internal detail of the map and identification of artifacts.

No raw map or half-maps were deposited for this entry and therefore no images, graphs, etc. pertaining to the raw map can be shown.

### 6.1 Orthogonal projections [i](#)

#### 6.1.1 Primary map

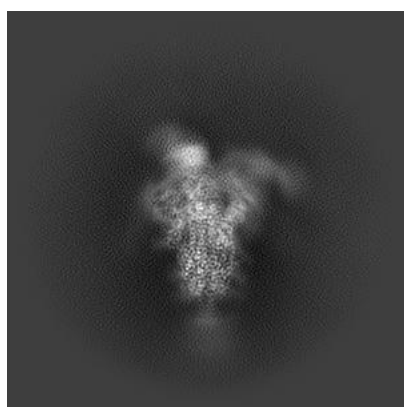

X

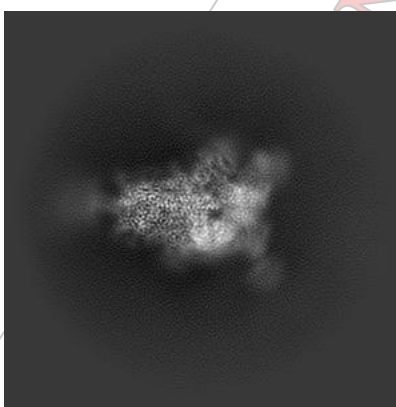

Y

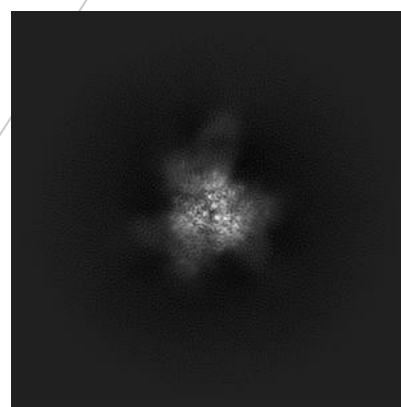

Z

The images above show the map projected in three orthogonal directions.

### 6.2 Central slices [i](#)

#### 6.2.1 Primary map

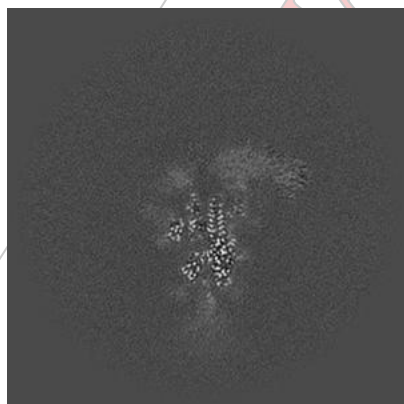

X Index: 200

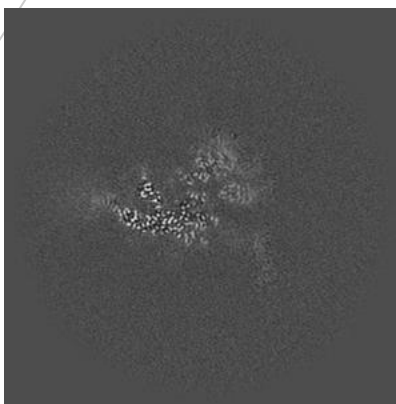

Y Index: 200

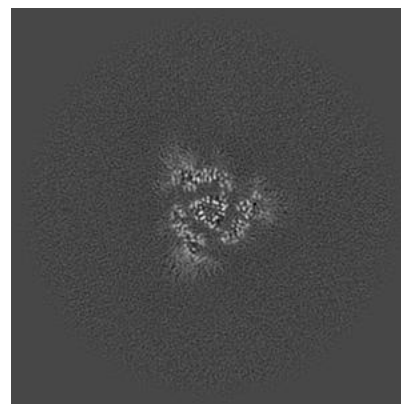

Z Index: 200



The images above show central slices of the map in three orthogonal directions.

## 6.3 Largest variance slices [i](#)

### 6.3.1 Primary map

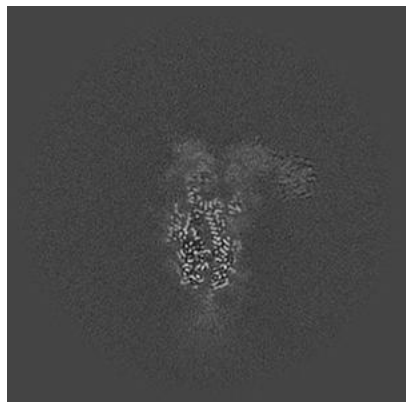

X Index: 211

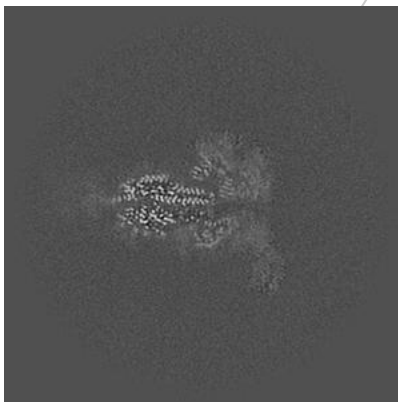

Y Index: 192

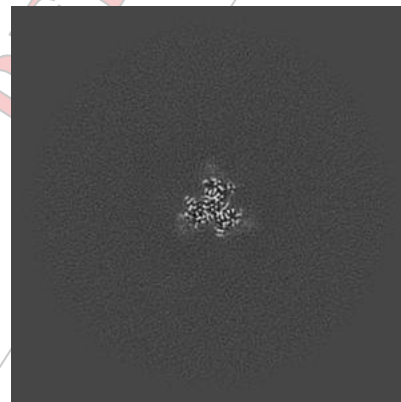

Z Index: 153

The images above show the largest variance slices of the map in three orthogonal directions.

## 6.4 Orthogonal surface views [i](#)

### 6.4.1 Primary map

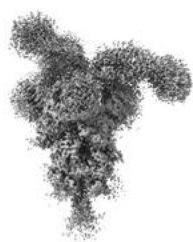

X

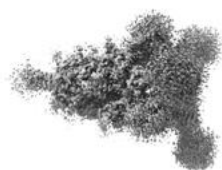

Y

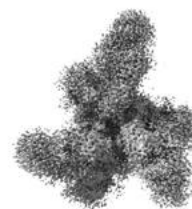

Z

The images above show the 3D surface view of the map at the recommended contour level 0.177. These images, in conjunction with the slice images, may facilitate assessment of whether an appropriate contour level has been provided.

## 6.5 Mask visualisation [i](#)

This section was not generated. No masks/segmentation were deposited.

**PRELIMINARY VALIDATION REPORT**

## 7 Map analysis [i](#)

This section contains the results of statistical analysis of the map.

### 7.1 Map-value distribution [i](#)

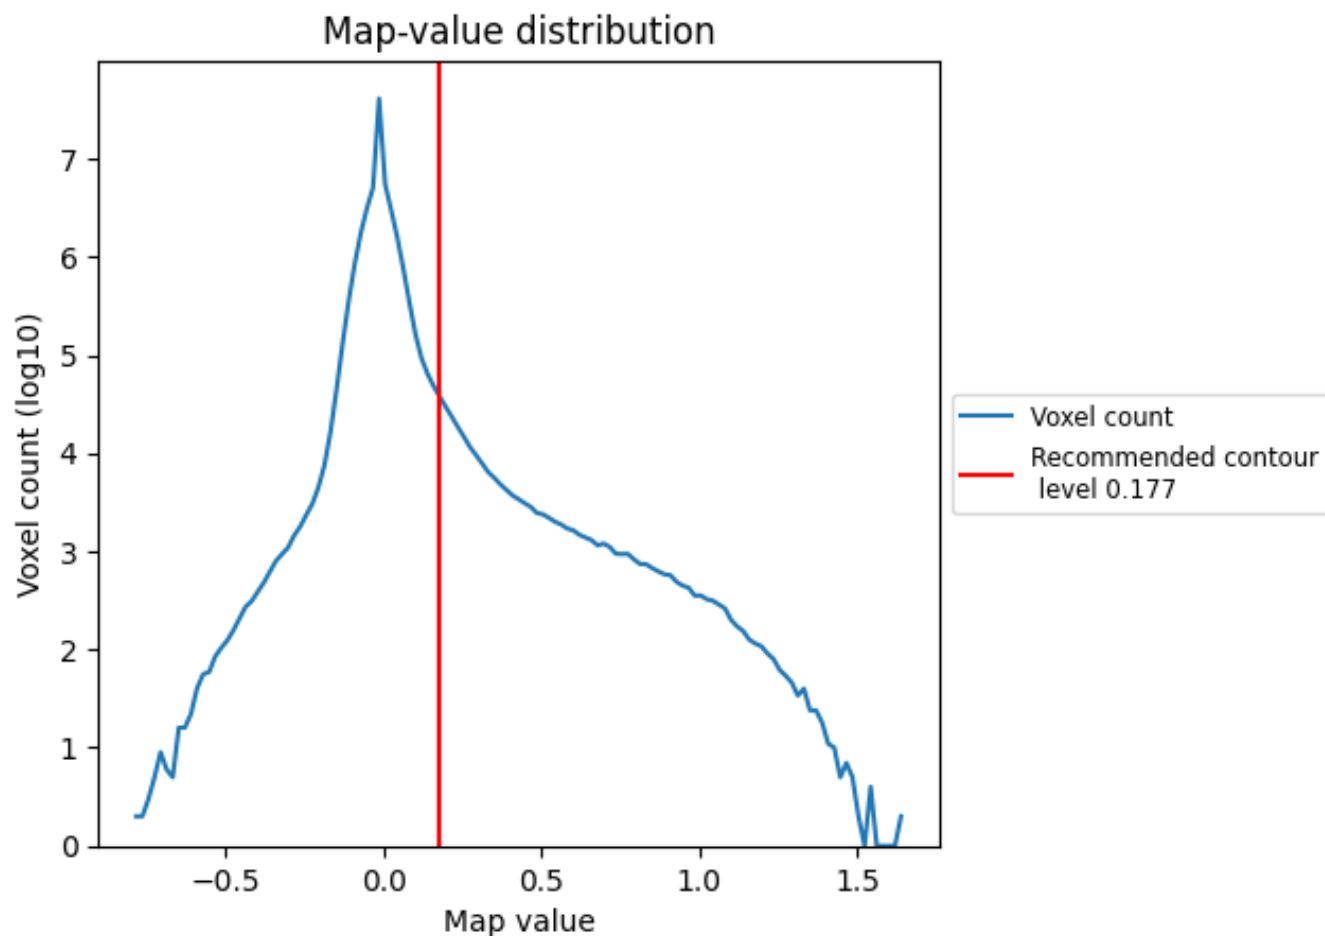

The map-value distribution is plotted in 128 intervals along the x-axis. The y-axis is logarithmic. A spike in this graph at zero usually indicates that the volume has been masked.

## 7.2 Volume estimate [\(i\)](#)

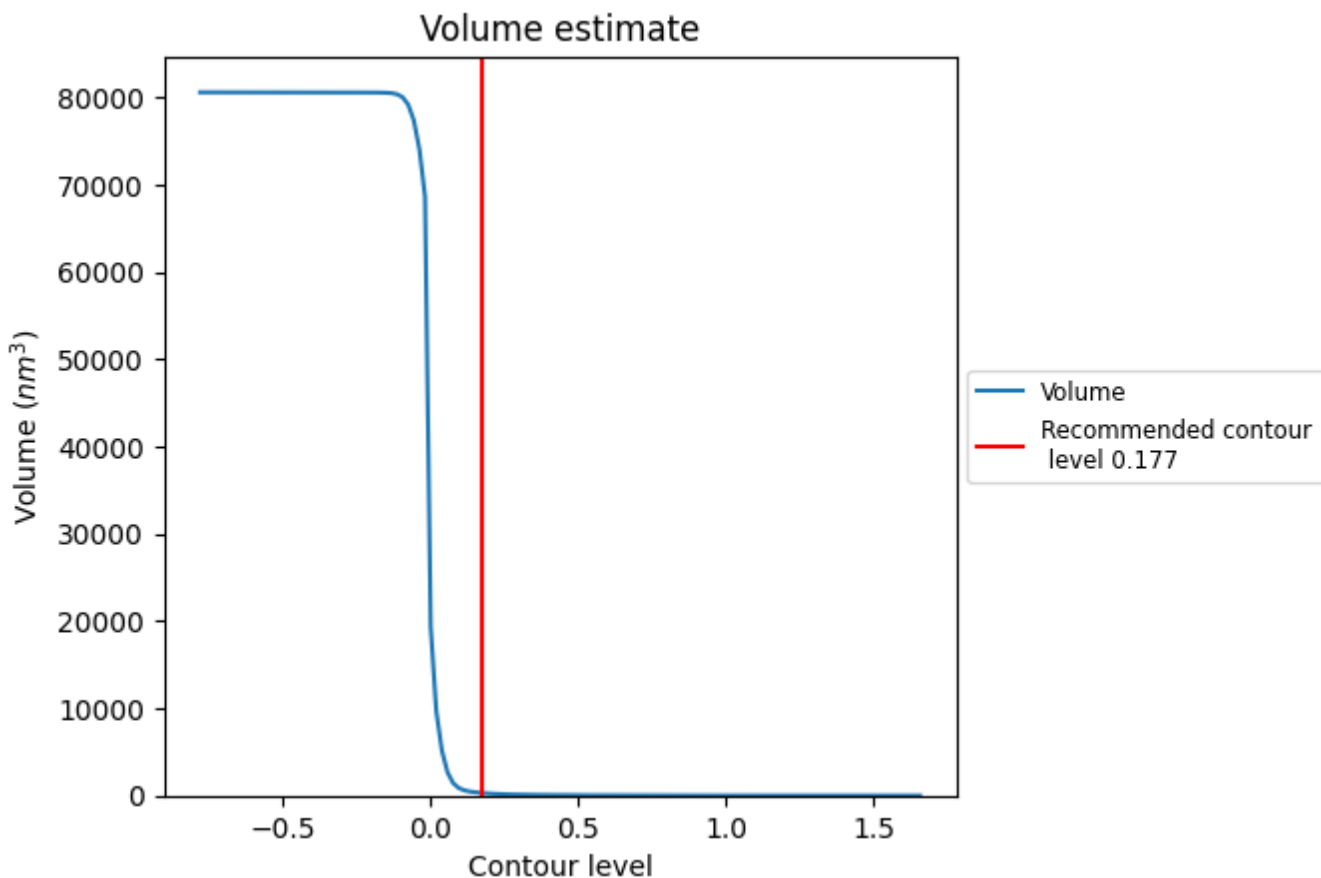

The volume at the recommended contour level is 285 nm<sup>3</sup>; this corresponds to an approximate mass of 257 kDa.

The volume estimate graph shows how the enclosed volume varies with the contour level. The recommended contour level is shown as a vertical line and the intersection between the line and the curve gives the volume of the enclosed surface at the given level.

### 7.3 Rotationally averaged power spectrum i

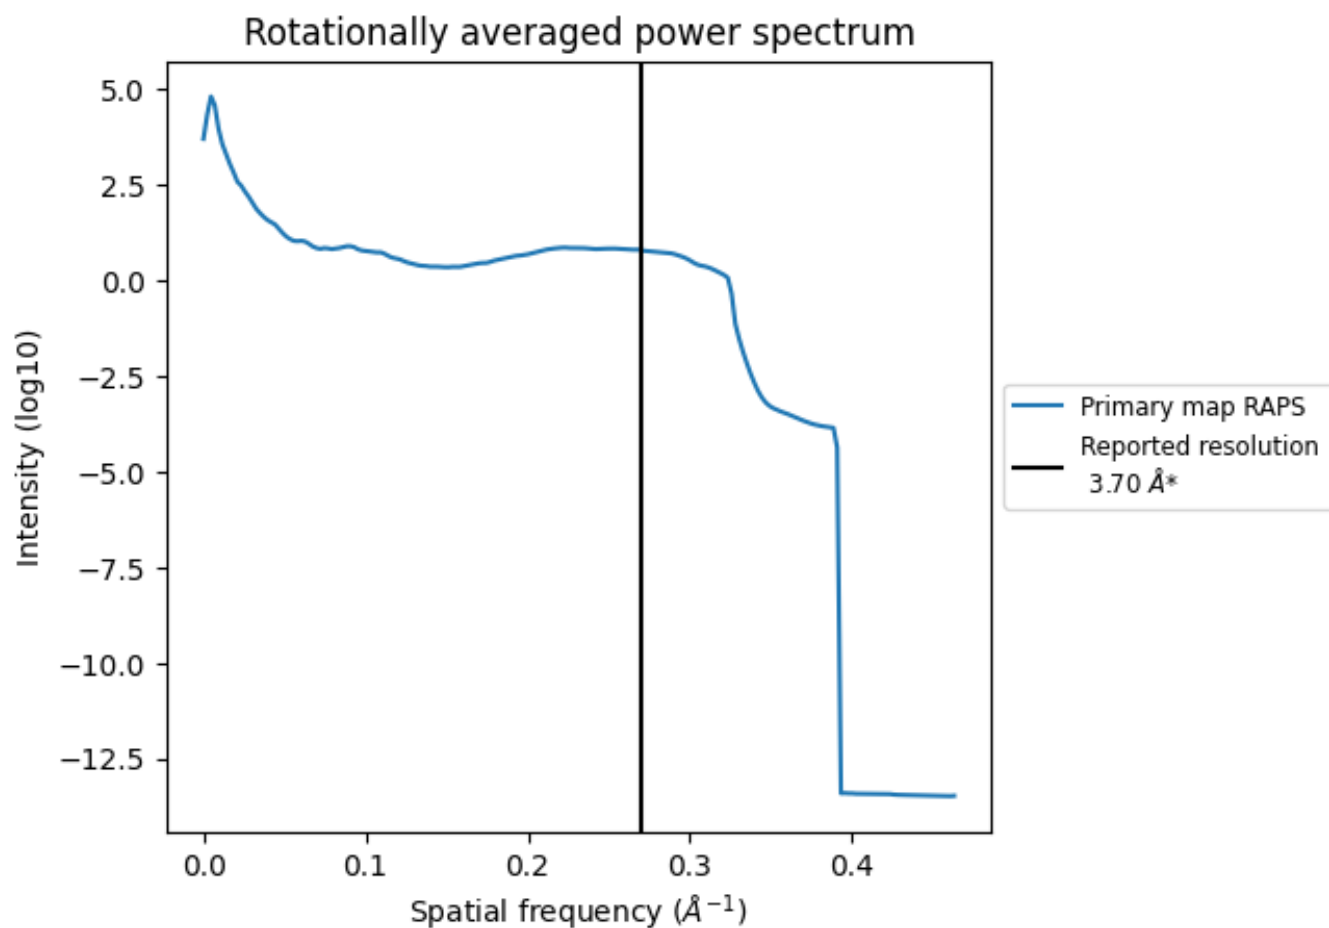

\*Reported resolution corresponds to spatial frequency of 0.270 Å<sup>-1</sup>

PRELIMINARY

## 8 Fourier-Shell correlation [i](#)

This section was not generated. No FSC curve or half-maps provided.

**PRELIMINARY VALIDATION REPORT**

## 9 Map-model fit [i](#)

This section contains information regarding the fit between EMDB map D\_1300026375 and PDB model D\_1300026375. Per-residue inclusion information can be found in section [3](#) on page [8](#).

### 9.1 Map-model overlay [i](#)

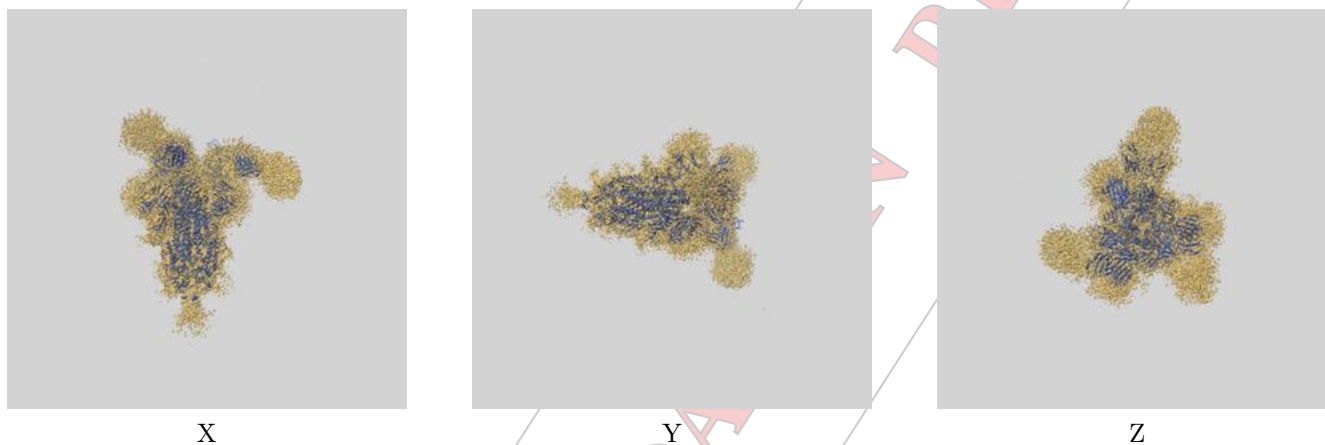

The images above show the 3D surface view of the map at the recommended contour level 0.177 at 50% transparency in yellow overlaid with a ribbon representation of the model coloured in blue. These images allow for the visual assessment of the quality of fit between the atomic model and the map.



## 9.2 Atom inclusion [i](#)

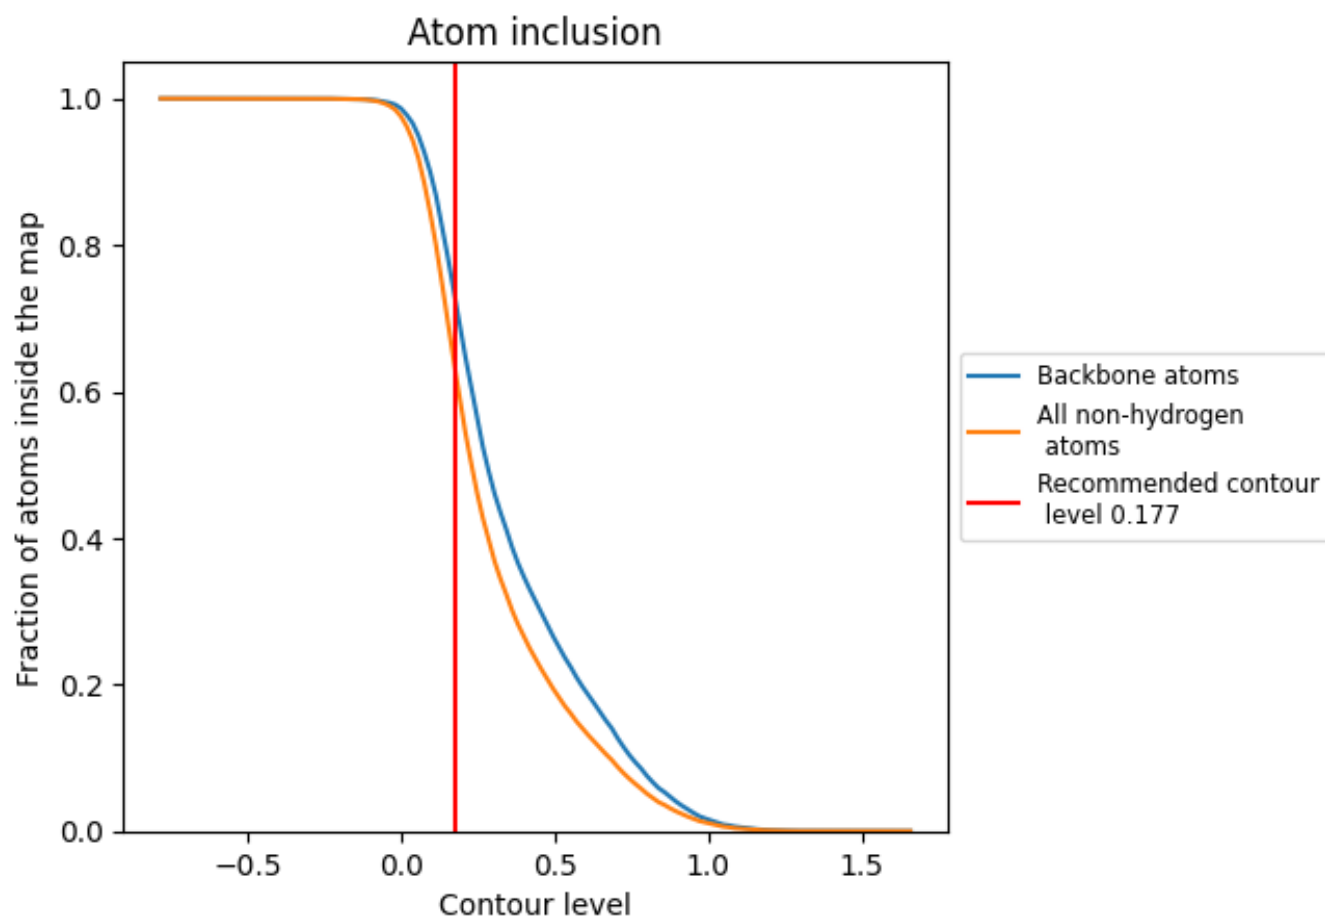

At the recommended contour level, 73% of all backbone atoms, 63% of all non-hydrogen atoms, are inside the map.

PRELIMINARY
